# Supplementary material
Source: PubMed Central journal article supplement (PMC3732023)

*Supporting Information for*

**Tunable Heparan Sulfate Mimetics for Modulating Chemokine Activity**

Gloria J. Sheng, Young In Oh, Shuh-Kuen Chang, and Linda C. Hsieh-Wilson

**CONTENTS:**

1. Supporting Figures
2. Supporting Tables
3. Experimental Methods
  - 3-1. General Synthetic Procedures
  - 3-2. Synthesis of Compounds and Assignments
  - 3-3. Direct and Competitive Enzyme-Linked Immunosorbent Assay (ELISA)
  - 3-4. Cell Culture
  - 3-5. Cell Migration Assay
  - 3-6. Chemokine Cell Binding Assay
  - 3-7. Chromogenic Assay for the Measurement of Antithrombin Activity
4. References
5. Nuclear Magnetic Resonance (NMR) Spectra

## 1. Supporting Figures

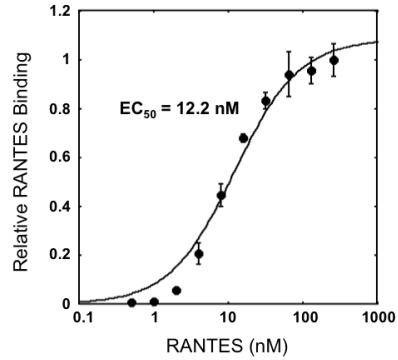

**Figure S1.** Binding of RANTES to heparin, as determined by ELISA. Heparin-binding 96-well plates were coated with heparin (25  $\mu\text{g}/\text{mL}$ ; 20-kDa). Human RANTES (1 – 1024 nM; ●) was serially diluted and then incubated in the heparin-coated plates. For ELISA analysis, RANTES was first incubated with a mouse anti-RANTES primary antibody and then with a goat anti-mouse IgG antibody conjugated to horseradish peroxidase (HRP). Levels of plate-bound RANTES were measured by detecting HRP activity at 450 nm. Data were fitted to a sigmoidal curve to determine the half-maximal effective concentration ( $\text{EC}_{50}$ ) for RANTES binding to heparin. Experiments were conducted in quadruplicate, and the standard error is depicted.

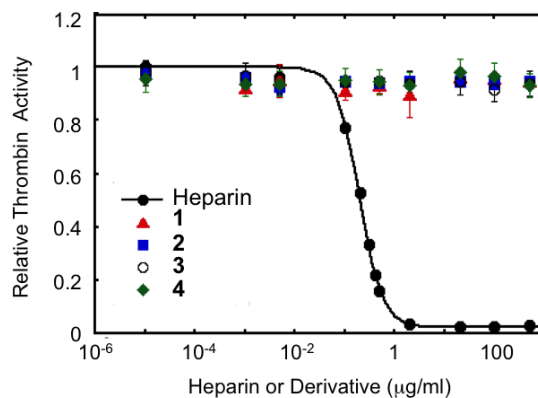

**Figure S2.** Glycopolymers **1** – **4** do not potentiate inhibition of thrombin in a purified system with antithrombin III. Human antithrombin III (1 IU/mL) was incubated with an excess of thrombin (24 IU/mL) in the presence of either heparin or glycopolymer ( $10^{-5}$  – 500  $\mu\text{g/mL}$ ). Heparin is known to bind to and induce a conformation change in the structure of antithrombin III, thereby increasing its inhibitory activity for thrombin (as observed in this assay). A chromogenic substrate (1.25  $\mu\text{mol/mL}$ ) specific for the proteolytic activity of thrombin was added to measure residual levels of thrombin in the mixture. The absorbance was measured at 405 nm and is inversely proportional to the ability of heparin or glycopolymer to potentiate the inhibitory activity of antithrombin III. Data represent the mean  $\pm$  standard error for quadruplicate assays.

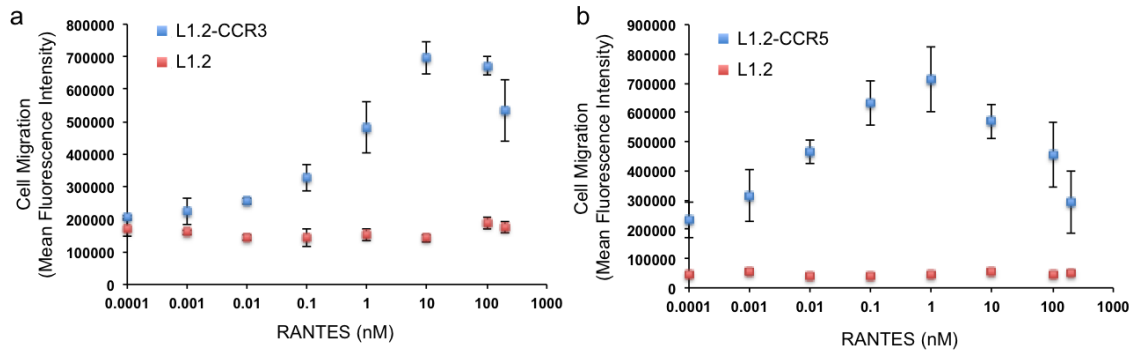

**Figure S3.** RANTES-induced migration of CCR3- and CCR5-expressing cells. Chemotactic response to RANTES is maximal at (a) 10 nM for CCR3-stably transfected L1.2 cells and (b) 1 nM for CCR5-stably transfected L1.2 cells. In both experiments, wild-type L1.2 cells did not migrate in response to RANTES as expected. Chemotaxis was measured using a 96-well modified Boyden chamber, and the relative number of migrated cells was determined using a fluorescent nucleic acid dye. Data represent the mean  $\pm$  standard error for two independent experiments, each conducted in quadruplicate.



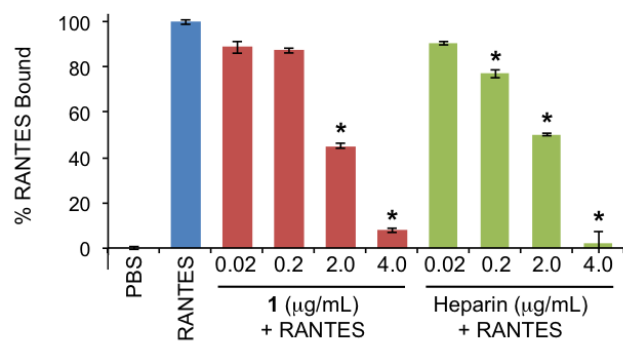

**Figure S4.** RANTES binding to CCR3-expressing cells. RANTES (100 nM) was preincubated with varying concentrations of heparin or glycopolymer **1** (0.02 – 2 µg/mL). Heparin or **1** inhibits the binding of RANTES to L1.2-CCR3 cells, as determined by flow cytometry (\*,  $P < 0.05$ ; means were compared to RANTES treatment alone using a Student's  $t$  test). Data represent the mean  $\pm$  standard error for three independent experiments, each conducted in quadruplicate.

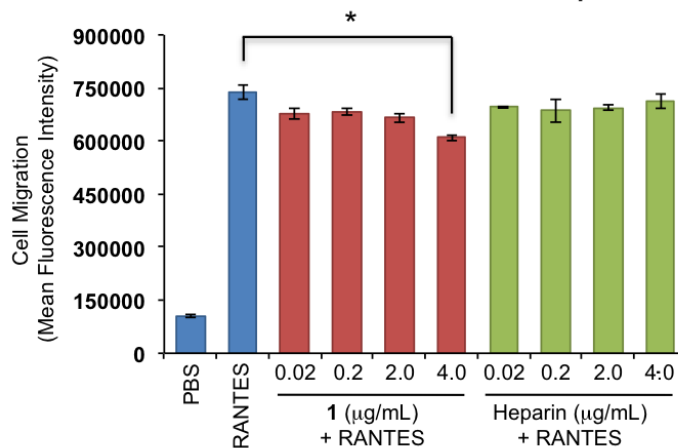

**Figure S5.** RANTES-induced migration of CCR5-expressing cells. RANTES (1 nM) was added to the bottom half of a 96-well modified Boyden chamber and pre-incubated with various concentrations of heparin or glycopolymer **1** prior to chemotaxis induction. The relative number of migrated cells was measured using a fluorescent nucleic acid dye. Heparin and **1** did not affect the migration of L1.2-CCR5 cells, except at the highest concentration of **1** (4 μg/mL; \*,  $P < 0.01$ ; means were compared to RANTES treatment alone using a Student's  $t$  test). Experiments were conducted in quadruplicate, and the standard error is depicted.

## 2. Supporting Tables

**Table S1. Properties of glycopolymers 1 – 4.**

| <b>Polymer</b> | <b>Monomer</b> | <b>mol%<br/>Catalyst</b> | <b>M<sub>n</sub><sup>a</sup><br/>(g/mol)</b> | <b>PDI<sup>a</sup></b> | <b>n<br/>(DP<sup>b</sup>)</b> |
|----------------|----------------|--------------------------|----------------------------------------------|------------------------|-------------------------------|
| <b>1</b>       | <b>22</b>      | 5                        | 27,870                                       | 1.22                   | 35                            |
| <b>2</b>       | <b>23</b>      | 5                        | 36,490                                       | 1.02                   | 48                            |
| <b>3</b>       | <b>24</b>      | 5                        | 53,580                                       | 1.16                   | 90                            |
| <b>4</b>       | <b>25</b>      | 5                        | 32,880                                       | 1.03                   | 46                            |

<sup>a</sup> Number average molecular weight (M<sub>n</sub>) and polydispersity index (PDI) were determined by size exclusion chromatography multi-angle light scattering (SEC-MALS).

<sup>b</sup> Degree of polymerization (DP). Despite equal mol% of catalyst, the DP was notably higher for unsulfated monomer **24**. This was likely due to increased solubility of the unsulfated polymer (**3**) in the polymerization co-solvent (10:1 dichloroethane/methanol) compared to the sulfated polymers (**1**, **2**, and **4**).

**Table S2. Half maximal inhibitory concentration (IC<sub>50</sub>) for antagonists of RANTES**

| Antagonist | IC <sub>50</sub><br>( $\mu\text{g/mL}$ ) <sup>a</sup> | IC <sub>50</sub><br>(nM) <sup>b</sup> | IC <sub>50</sub><br>( $\mu\text{g/mL}$<br>of disac) <sup>c</sup> | IC <sub>50</sub><br>( $\mu\text{M}$<br>of disac) <sup>d</sup> |
|------------|-------------------------------------------------------|---------------------------------------|------------------------------------------------------------------|---------------------------------------------------------------|
| <b>1</b>   | 9.3 $\pm$ 1.1                                         | 334 $\pm$ 39                          | 6.8 $\pm$ 0.80                                                   | 11.7 $\pm$ 1.4                                                |
| <b>2</b>   | 31.1 $\pm$ 6.2                                        | 852 $\pm$ 170                         | 21.8 $\pm$ 4.4                                                   | 40.3 $\pm$ 8.0                                                |
| <b>4</b>   | 58.0 $\pm$ 5.7                                        | 1760 $\pm$ 170                        | 40.6 $\pm$ 4.0                                                   | 81.3 $\pm$ 8.0                                                |
| Heparin    | 0.90 $\pm$ 0.03                                       | 45.0 $\pm$ 1.5                        | 0.90 $\pm$ 0.03                                                  | 1.50 $\pm$ 0.05                                               |

<sup>a</sup> Values were determined from Figure 1 using KaleidaGraph software. Data represent the mean  $\pm$  standard error for quadruplicate assays.

<sup>b</sup> Values were calculated from Figure 1 based on molar concentration of antagonist (see Table S1 for molecular weights of polymers **1-4**).

<sup>c</sup> Values were corrected for ligand valence after taking into account the mass percentage of disaccharide contributing to each disaccharide-norbornyl linker unit.

<sup>d</sup> Values were corrected for ligand valence based on molar concentration of disaccharide.

### 3. Experimental Methods

#### 3-1. General Synthetic Procedures

Unless stated otherwise, reactions were performed in flame-dried glassware under an argon atmosphere using freshly dried solvents. Solvents were dried via passage through an activated alumina column under argon. All other commercially obtained reagents were used as received unless otherwise noted. Thin-layer chromatography (TLC) was performed using E. Merck silica gel 60 F254 pre-coated plates (0.25 mm). Visualization of the chromatogram was accomplished by UV, cerium ammonium molybdate or ninhydrin staining as necessary. ICN silica gel (particle size 0.032 – 0.063 mm) was used for flash chromatography. Gel filtration chromatography was also used in order to achieve purification of the final products.

$^1\text{H}$  and  $^{13}\text{C}$  NMR experiments were recorded on Varian Mercury 300 (at 300 MHz), Varian Inova 500 (at 500 MHz), or Varian Inova 600 (600 MHz) spectrometers and are reported in parts per million ( $\delta$ ) relative to  $\text{CDCl}_3$  (7.26 ppm) or  $\text{CD}_3\text{OD}$  (4.80 ppm). Data for  $^1\text{H}$  are reported as follows: chemical shift ( $\delta$  ppm), multiplicity (s = singlet, d = doublet, t = triplet, q = quartet, m = multiplet), coupling constant in Hz, and integration.  $^{13}\text{C}$  NMR spectra were obtained on Varian Inova 500 (at 125 MHz) or Varian Inova 600 (at 150 MHz) spectrometers and are reported in terms of chemical shift (77.2 ppm for  $\text{CDCl}_3$ ; 49.0 for  $\text{CD}_3\text{OD}$ ). When necessary, proton and carbon assignments were made by means of  $^1\text{H}$ - $^1\text{H}$  gCOSY,  $^1\text{H}$ - $^1\text{H}$  TOCSY, and  $^1\text{H}$ - $^{13}\text{C}$  gHSQCAD. Stereochemical assignments are supported by  $^1\text{H}$ - $^1\text{H}$  ROESY spectra. Mass spectra were obtained using a Perkin Elmer/Sciex API 365 triple quadrupole/electrospray tandem mass spectrometer or a Waters LCT Premier XE high resolution mass spectrometer.

#### 3-2. Synthesis of Compounds and Assignments

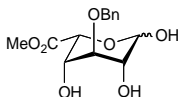

**Methyl 3-O-benzyl-L-idopyranosyluronate (9).** Compound **9** was prepared in six steps from the commercially available diacetone glucose (Sigma Aldrich) using previously reported procedures.<sup>1</sup> The analytical data were in agreement with the reported spectra.

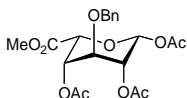

**Methyl 1,2,4-tri-*O*-acetyl-3-*O*-benzyl- $\beta$ -L-idopyranosyluronate (10).** Compound **9** (0.30 g, 1.0 mmol) was added to CH<sub>2</sub>Cl<sub>2</sub> (5.5 mL) at 0 °C, and the solution was cooled to -40 °C. 4-Dimethylaminopyridine (120 mg, 0.10 mmol) was added, followed by pyridine (700  $\mu$ L, 10 mmol). Acetyl chloride (470  $\mu$ L, 6.0 mmol) was then added dropwise to the reaction mixture, which was stirred for 10 h at -40 °C. The reaction was quenched with aqueous NaHCO<sub>3</sub> (50 mL), extracted with CH<sub>2</sub>Cl<sub>2</sub> (2.0 x 50 mL), and subsequently washed with H<sub>2</sub>O, 1M H<sub>2</sub>SO<sub>4</sub>, and then H<sub>2</sub>O (50 mL for each wash). The combined organic layers were dried over MgSO<sub>4</sub> and concentrated under reduced pressure. Purification by silica gel flash chromatography (3:1 hexanes:EtOAc) afforded compound **10** (0.40 g) in quantitative yield. The analytical data were in agreement with previously reported spectra.<sup>3</sup> ESI-TOF HRMS: *m/z* calcd for C<sub>20</sub>H<sub>23</sub>O<sub>10</sub> [M+H]-H<sub>2</sub> 423.1286; found: 423.1286.

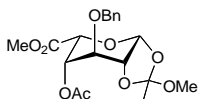

**Methyl 4-*O*-acetyl-3-*O*-benzyl- $\beta$ -L-idopyranuronate 1,2-(methyl-orthoacetate) (11).** TiBr<sub>4</sub> (8.1 g, 22 mmol) was added to a solution of compound **10** (6.9 g, 16 mmol) in CH<sub>2</sub>Cl<sub>2</sub> (360 mL), and the reaction was stirred for 16 h at ambient temperature with exclusion of light. The reaction was quenched with ice-cold H<sub>2</sub>O (2.0 x 500 mL), filtered through Celite, and concentrated under reduced pressure. The resulting brown oil was immediately used in the next reaction without further purification. The crude bromide intermediate (16 mmol) was dissolved in CH<sub>2</sub>Cl<sub>2</sub> (220 mL). 2,4,6-Collidine (11 mL, 80 mmol) and methanol (8.0 mL) were added to this solution, and the reaction was stirred for 14 h at room temperature (rt). The reaction mixture was then diluted with CH<sub>2</sub>Cl<sub>2</sub> (500 mL), washed with aqueous NaHCO<sub>3</sub> and H<sub>2</sub>O (200 mL each), dried over MgSO<sub>4</sub>, and concentrated under reduced pressure. Purification by silica gel flash chromatography (6:1 hexanes:EtOAc + 1% Et<sub>3</sub>N) afforded **11** (7.6 g, 75% over 2 steps) as a light yellow oil. <sup>1</sup>H NMR (500 MHz; CDCl<sub>3</sub>):  $\delta$  7.44 – 7.30 (m, 5H, OCH<sub>2</sub>Ph), 5.57 (d, *J* = 2.7 Hz, 1H, H-1), 5.20 (dt, *J* = 2.7, 1.3 Hz, 1H, H-4), 4.82 (d, *J* = 11.7 Hz, 1H, OCH<sub>2</sub>Ph), 4.69 (d, *J* = 11.7 Hz, 1H, OCH<sub>2</sub>Ph), 4.56 (d, *J* = 1.4 Hz, 1H, H-5), 4.15 (dd, *J* = 2.7, 1.9 Hz, 1H, H-3), 4.09 (ddd, *J* = 2.9, 1.9, 1.2 Hz, 1H, H-2), 3.79 (s, 3H, CO<sub>2</sub>CH<sub>3</sub>), 3.26 (s, 3H, OCH<sub>3</sub>), 2.05 (s, 3H, OCOCH<sub>3</sub>), 1.74 (s, 3H, CH<sub>3</sub>); <sup>13</sup>C NMR (125 MHz; CDCl<sub>3</sub>):  $\delta$  170.1, 168.1, 136.8, 128.6, 128.4, 128.0, 96.6, 77.3, 76.1, 72.9, 71.3, 69.6, 68.9, 52.6, 49.1, 25.0, 20.1; ESI-TOF HRMS: *m/z* calcd for C<sub>19</sub>H<sub>23</sub>O<sub>9</sub> [M+H]-H<sub>2</sub> 395.1342; found: 395.1354.

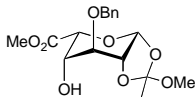

**Methyl 3-*O*-benzyl- $\beta$ -L-idopyranuronate 1,2-(methyl-orthoacetate) (12).** Compound **11** (7.2 g, 18 mmol) was dissolved in methanol (90 mL) and cooled to -10 °C. A 0.5 M solution NaOMe (1.8 mL, 0.91 mmol) was added, and the reaction mixture was stirred at -10 °C for 2 h and at 5 °C overnight. The solution was diluted with CH<sub>2</sub>Cl<sub>2</sub> (200 mL) at 5 °C, quenched with aqueous NaHCO<sub>3</sub> and H<sub>2</sub>O (500 mL each), and then extracted with (3.0 x 250 mL). The organic fractions were dried over MgSO<sub>4</sub> and concentrated under reduced pressure. Purification by silica gel flash chromatography (4:1  $\rightarrow$  1:1 hexanes:EtOAc + 1% Et<sub>3</sub>N) yielded **12** (9.5 g, 80%) as a clear oil. <sup>1</sup>H NMR (500 MHz; CDCl<sub>3</sub>):  $\delta$  7.36 – 7.34 (m, 5H, OCH<sub>2</sub>Ph), 5.51 (d,  $J$  = 2.4 Hz, 1H, H-1), 4.72 (d,  $J$  = 11.7 Hz, 1H, OCH<sub>2</sub>Ph), 4.62 (d,  $J$  = 11.7 Hz, 1H, OCH<sub>2</sub>Ph), 4.52 (s, 1H, H-4), 4.15 – 4.08 (m, 3H, H-2, H-5), 3.81 (s, 3H, CO<sub>2</sub>CH<sub>3</sub>), 3.30 (s, 3H, OCH<sub>3</sub>), 2.78 (d,  $J$  = 11.4 Hz, 1H, H-3), 1.76 (s, 3H, CH<sub>3</sub>); <sup>13</sup>C NMR (125 MHz; CDCl<sub>3</sub>):  $\delta$  168.3, 136.8, 128.7, 128.4, 127.9, 96.8, 75.8, 73.0, 72.9, 71.8, 67.0, 52.5, 50.3, 24.4; ESI-TOF HRMS:  $m/z$  calcd for C<sub>17</sub>H<sub>21</sub>O<sub>8</sub> [M+H]-H<sub>2</sub> 353.1236; found: 353.1226.

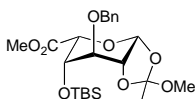

**Methyl 3-*O*-benzyl-4-*O*-tert-butyl dimethylsilyl- $\beta$ -L-idopyranuronate 1,2-(methyl-orthoacetate) (13).** Compound **12** (230 mg, 0.64 mmol) was dissolved in pyridine (7.8 mL) and the solution was cooled to -10 °C. TBSOTf (1.5 mL, 0.65 mmol) was added, and the reaction was stirred overnight at 0 °C. The reaction was diluted with CH<sub>2</sub>Cl<sub>2</sub> (100 mL), quenched with aqueous NaHCO<sub>3</sub> (100 mL), and extracted with EtOAc (3.0 x 50 mL). The combined organic fractions were dried over MgSO<sub>4</sub> and concentrated under reduced pressure. Purification by silica gel flash chromatography (7:1 hexanes:EtOAc + 1% Et<sub>3</sub>N) yielded compound **32** (380 mg, 92%) as a clear oil. <sup>1</sup>H NMR (500 MHz; CDCl<sub>3</sub>):  $\delta$  7.47 (m, 5H, OCH<sub>2</sub>Ph), 5.62 (d,  $J$  = 2.5 Hz, 1H, H-1), 4.80 (d,  $J$  = 12 Hz, 1H, OCH<sub>2</sub>Ph), 4.75 (d,  $J$  = 12 Hz, 1H, OCH<sub>2</sub>Ph), 4.51 (s, 1H, H-4), 4.21 (s, 1H, H-5), 4.20 (d,  $J$  = 1 Hz, 1H, H-4), 3.98 (s, 1H, H-3), 3.89 (s, 3H, CO<sub>2</sub>CH<sub>3</sub>), 3.40 (s, 3H, OCH<sub>3</sub>), 1.84 (s, 3H, CH<sub>3</sub>), 0.94 (s, 9H, SiC(CH<sub>3</sub>)<sub>3</sub>), 0.08 (s, 3H, SiCH<sub>3</sub>), 0.06 (s, 3H, SiCH<sub>3</sub>); <sup>13</sup>C NMR (125 MHz; CDCl<sub>3</sub>):  $\delta$  169.6, 137.0, 128.9, 128.6, 128.2, 124.6, 97.1, 76.3, 74.6, 72.8, 72.5, 67.9, 52.4, 49.5, 29.9, 25.7, 25.6, -4.4, -5.2; TOF HRMS ES  $m/z$  calcd for C<sub>23</sub>H<sub>36</sub>O<sub>8</sub>SiNa [M+Na]<sup>+</sup>: 491.2077; found: 491.2070.

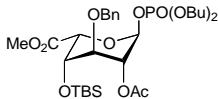

**Methyl (dibutylphosphate-2-*O*-acetyl-3-*O*-benzyl-4-*O*-*tert*-butyldimethylsilyl- $\alpha$ -L-idopyranosid)uronate (6).** Compound **13** (140 mg, 0.29 mmol) was dissolved in CH<sub>2</sub>Cl<sub>2</sub> (7.3 mL) at rt. Freshly activated 4Å molecular sieves (290 mg) were added, and the solution was stirred for 15 min. Dibutylphosphate (0.54 mL, 2.9 mmol) was added slowly, and the reaction mixture was stirred overnight. After confirming that the reaction was complete by TLC, the reaction was quenched with triethylamine (2.0 mL) and concentrated under reduced pressure. Silica gel flash chromatography (5:1  $\rightarrow$  3:1 hexanes:EtOAc + 1% Et<sub>3</sub>N) afforded the desired product (170 mg) in quantitative yield. <sup>1</sup>H NMR (500 MHz; CDCl<sub>3</sub>):  $\delta$  7.36 – 7.35 (m, 5H, OCH<sub>2</sub>Ph), 5.82 (d,  $J$  = 7.2 Hz, 1H, H-1), 4.97 (m, 1H, H-2), 4.86 (d,  $J$  = 2.7 Hz, 1H, H-5), 4.78 (d,  $J$  = 12 Hz, 1H, OCH<sub>2</sub>Ph), 4.62 (d,  $J$  = 12 Hz, 1H, OCH<sub>2</sub>Ph), 4.09 – 3.99 (m, 5H, H-4, P(OCH<sub>2</sub>CH<sub>2</sub>CH<sub>3</sub>)<sub>2</sub>), 3.77 (s, 3H, CO<sub>2</sub>CH<sub>3</sub>), 3.62 (m, 1H, H-3), 2.04 (s, 3H, COCH<sub>3</sub>), 1.64 – 1.60 (m, 4H, P(OCH<sub>2</sub>CH<sub>2</sub>CH<sub>2</sub>CH<sub>3</sub>)<sub>2</sub>), 1.40 – 1.25 (m, 4H, P(OCH<sub>2</sub>CH<sub>2</sub>CH<sub>2</sub>CH<sub>3</sub>)<sub>2</sub>), 0.96 – 0.88 (m, 6H, P(OCH<sub>2</sub>CH<sub>2</sub>CH<sub>2</sub>CH<sub>3</sub>)<sub>2</sub>), 0.81 (s, 9H, SiC(CH<sub>3</sub>)<sub>3</sub>), 0.07 (s, 3H, SiCH<sub>3</sub>), 0.17 (s, 3H, SiCH<sub>3</sub>); <sup>13</sup>C NMR (125 MHz; CDCl<sub>3</sub>):  $\delta$  169.8, 169.2, 146.6, 137.3, 128.4, 128.0, 95.4, 73.8, 72.0, 68.0, 67.8, 67.0, 66.9, 52.1, 32.1, 25.4, 20.9, 18.6, 17.8, 13.5, -4.7, -5.7; ESI-TOF HRMS  $m/z$  calcd for C<sub>30</sub>H<sub>52</sub>O<sub>11</sub>PSi [M+H]<sup>+</sup>: 647.3017; found: 647.3001.

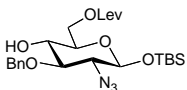

**2-*O*-Azido-3-*O*-benzyl-6-*O*-levulinoyl-1-*O*-*tert*-butyldimethylsilyl-2-deoxy- $\beta$ -D-glucopyranoside (7).** Compound **7** was prepared from readily available D-glucosamine (Sigma Aldrich) using previously published procedures, and the analytical data were in agreement with previously reported spectra.<sup>1</sup>

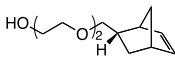

**2-(2-((2*S*)-bicyclo[2.2.1]hept-5-en-2-ylmethoxy)ethoxy)ethanol (8).** Compound **8** was prepared using a previously published procedure, and the analytical data were in agreement with reported spectra.<sup>2</sup>



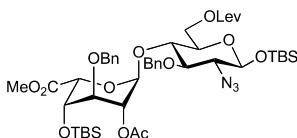

**Methyl 2-*O*-acetyl-3-*O*-benzyl-4-*O*-*tert*-butyldimethylsilyl- $\alpha$ -L-idopyranosyluronate-(1 $\rightarrow$ 4)-*tert*-butyldimethylsilyl (2-azido-3-*O*-benzyl-6-*O*-levulinoyl-2-deoxy- $\beta$ -D-glucopyranoside)**

**(14).** Compound **6** (92 mg, 0.14 mmol) and **7** (77 mg, 0.17 mmol) were co-evaporated with toluene (3.0 x 1.0 mL) and placed under vacuum overnight. The mixture was dissolved in CH<sub>2</sub>Cl<sub>2</sub> (4.2 mL), and freshly activated 4Å molecular sieves (0.21 g) were added. After stirring at rt for 15 min, the temperature was lowered to -10 °C and the mixture stirred for an additional 15 min. TMSOTf (31  $\mu$ L, 0.18 mmol) was added dropwise to the reaction mixture. The reaction was stirred at -30 °C for 30 min, quenched with Et<sub>3</sub>N (1.0 mL), filtered through a silica pad, and concentrated under reduced pressure. Silica gel flash chromatography (5:1  $\rightarrow$  4:1 hexanes:EtOAc) afforded the desired product (120 mg) in 93% yield. <sup>1</sup>H NMR (600 MHz; CDCl<sub>3</sub>):  $\delta$  7.37 – 7.24 (m, 10H, OCH<sub>2</sub>Ph), 5.20 (d, *J* = 4.2 Hz, 1H, H-1 of IdoA), 4.85 (t, *J* = 4.1 Hz, 1H, H-2 of IdoA), 4.82 (d, *J* = 10.6 Hz, 1H, OCH<sub>2</sub>Ph), 4.74 (d, *J* = 11.8 Hz, 1H, OCH<sub>2</sub>Ph), 4.71 (d, *J* = 10.8 Hz, 1H, OCH<sub>2</sub>Ph), 4.69 (d, *J* = 3.9 Hz, 1H, H-5 of IdoA), 4.64 (d, *J* = 11.8 Hz, 1H, OCH<sub>2</sub>Ph), 4.54 (dd, *J* = 11.8, 2.1 Hz, 1H, H-1 of GlcN), 4.51 – 4.45 (m, 1H, H-6), 4.20 – 4.03 (m, 1H, H-6), 3.99 (t, *J* = 4.3 Hz, 1H, H-4 of IdoA), 3.91 – 3.77 (m, 1H, H-4 of GlcN), 3.61 (t, *J* = 4.3 Hz, 1H, H-3 of IdoA), 3.54 (s, 3H, CO<sub>2</sub>CH<sub>3</sub>), 3.48 (ddd, *J* = 9.8, 5.9, 2.2 Hz, 1H, H-5 of GlcN), 3.37 – 3.24 (m, 2H, H-2 and H-3 of GlcN), 2.89 – 2.66 (m, 2H, COCH<sub>2</sub>CH<sub>2</sub>COCH<sub>3</sub>), 2.61 (t, *J* = 6.7 Hz, 2H, COCH<sub>2</sub>CH<sub>2</sub>COCH<sub>3</sub>), 2.19 (s, 3H, COCH<sub>2</sub>CH<sub>2</sub>COCH<sub>3</sub>), 2.00 (s, 3H, COCH<sub>3</sub>), 0.92 (s, 9H, SiC(CH<sub>3</sub>)<sub>3</sub>), 0.81 (s, 9H, SiC(CH<sub>3</sub>)<sub>3</sub>), 0.13 (d, *J* = 4.6 Hz, 6H, SiCH<sub>3</sub>), -0.06 (s, 3H, SiCH<sub>3</sub>), -0.12 (s, 3H, SiCH<sub>3</sub>); <sup>13</sup>C NMR (125 MHz; CDCl<sub>3</sub>):  $\delta$  206.5, 172.2, 170.2, 169.9, 138.2, 137.7, 128.5, 128.1, 128.1, 127.9, 127.4, 97.6, 97.1, 80.6, 76.8, 76.5, 75.4, 74.8, 73.4, 72.7, 71.5, 69.9, 68.9, 68.5, 62.6, 51.7, 38.0, 29.9, 28.0, 25.6, 25.5, 20.9, 18.0, 17.8, -4.3, -4.7, -5.2, -5.5; ESI-TOF HRMS *m/z* calcd for C<sub>46</sub>H<sub>69</sub>N<sub>3</sub>O<sub>14</sub>Si<sub>2</sub> [M+Na]<sup>+</sup>: 966.4216; found: 966.4211.

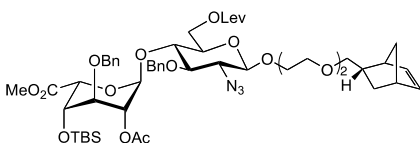

**Methyl 2-*O*-acetyl-3-*O*-benzyl-4-*O*-*tert*-butyldimethylsilyl- $\alpha$ -L-idopyranosyluronate-(1 $\rightarrow$ 4)-2-azido-3-*O*-benzyl-1-*O*-(2-(2-((2*S*)-bicyclo[2.2.1]hept-5-en-2-yl-methoxy)ethoxy)ethyl)-6-*O*-levulinoyl-2-deoxy- $\alpha$ -D-glucopyranoside (**5**).** Compound **15** (37 mg, 60  $\mu$ mol) and **8** (33 mg, 70

$\mu\text{mol}$ ) were co-evaporated with toluene (3.0 x 1.0 mL) and placed under vacuum overnight. The mixture was dissolved in  $\text{CH}_2\text{Cl}_2$  (1.7 mL) and freshly activated 4Å molecular sieves (80 mg) were added. After stirring at rt for 15 min, the temperature was lowered to  $-30\text{ }^\circ\text{C}$  and the mixture stirred for an additional 15 min. TMSOTf (14  $\mu\text{L}$ , 70  $\mu\text{mol}$ ) was added dropwise to the reaction mixture. The reaction was stirred at  $-10\text{ }^\circ\text{C}$  for 10 min, slowly raised to rt over 15 min, quenched with  $\text{Et}_3\text{N}$  (0.50 mL), filtered through a silica pad, and concentrated under reduced pressure. Silica gel flash chromatography (10:1  $\rightarrow$  4:1  $\rightarrow$  3:1 hexanes:EtOAc) afforded the desired product (35 mg) in 67% yield.  $^1\text{H}$  NMR (500 MHz;  $\text{CDCl}_3$ ):  $\delta$  7.38 – 7.25 (m, 10H,  $\text{OCH}_2\text{Ph}$ ), 6.07 (ddd,  $J = 25.6, 5.7, 3.0$  Hz, 2H,  $\text{CH}=\text{CH}$  of Nb), 5.19 (d,  $J = 4.2$  Hz, 1H, H-1 of IdoA), 4.89 – 4.79 (m, 2H, H-2 of IdoA,  $\text{OCH}_2\text{Ph}$ ), 4.72 – 4.68 (m, 3H, H-5 of IdoA,  $\text{OCH}_2\text{Ph}$ ), 4.64 (d,  $J = 11.9$  Hz, 1H,  $\text{OCH}_2\text{Ph}$ ), 4.52 (dd,  $J = 12.1, 2.2$  Hz, 1H, H-6 of GlcN), 4.34 (d,  $J = 7.9$  Hz, 1H, H-1 of GlcN), 4.12 (dd,  $J = 12.1, 2.2$  Hz, 1H, H-6 of GlcN), 4.02 – 3.93 (m, 2H, H-4 of IdoA,  $\text{OCH}_2$  of PEG linker), 3.87 (dd,  $J = 9.8, 8.9$  Hz, 1H, H-4 of GlcN), 3.82 – 3.55 (m, 5H, H-3 of IdoA,  $\text{OCH}_2$  of PEG linker), 3.54 (s, 3H,  $\text{CO}_2\text{CH}_3$ ), 3.53 – 3.29 (m, 5H, H-5 of GlcN, H-2 of GlcN, H-3 of GlcN,  $\text{OCH}_2$  of PEG linker), 2.88 – 2.67 (m, 4H,  $\text{CH}-\text{CH}=\text{CH}$  of Nb,  $\text{COCH}_2\text{CH}_2\text{COCH}_3$ ), 2.67 – 2.56 (m, 2H,  $\text{COCH}_2\text{CH}_2\text{COCH}_3$ ), 2.19 (s, 3H,  $\text{COCH}_2\text{CH}_2\text{COCH}_3$ ), 2.00 (s, 3H,  $\text{OCOCH}_3$ ), 1.75 – 1.66 (m, 1H,  $\text{CH}$  of Nb), 1.39 – 1.15 (m, 4H,  $\text{CH}_2$  of Nb), 0.81 (s, 9H,  $\text{Si}(\text{CH}_3)_3$ ),  $-0.06$  (s, 3H,  $\text{SiCH}_3$ ),  $-0.11$  (s, 3H,  $\text{SiCH}_3$ );  $^{13}\text{C}$  NMR (125 MHz;  $\text{CDCl}_3$ ):  $\delta$  136.6, 128.5, 128.2, 127.8, 102.2, 80.9, 76.8, 76.1, 75.0, 73.2, 72.9, 71.6, 70.7, 70.4, 66.0, 45.0, 43.6, 38.8, 38.0, 29.8, 28.1, 25.5; ESI-TOF HRMS  $m/z$  calcd for  $\text{C}_{52}\text{H}_{73}\text{N}_3\text{O}_{16}\text{Si}$   $[\text{M}+\text{Na}]^+$ : 1046.4658; found: 1046.4670

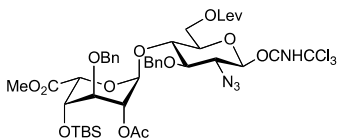

**Methyl 2-O-acetyl-3-O-benzyl-4-O-tert-butyltrimethylsilyl- $\alpha$ -L-idopyranosyluronate-(1 $\rightarrow$ 4)-2-azido-3-O-benzyl-6-O-levulinoyl-2-deoxy- $\beta$ -D-glucopyranosyl trichloroacetimidate (15).**

Compound **14** (840 mg, 0.89 mmol) was dissolved in THF (27 mL) and the solution was cooled to  $0\text{ }^\circ\text{C}$ . 1M TBAF (1.2 mL, 1.2 mmol) and AcOH (60  $\mu\text{L}$ , 1.1 mmol) were added simultaneously, and the reaction was stirred for 30 min at  $0\text{ }^\circ\text{C}$ . The reaction was quenched with aqueous  $\text{NaHCO}_3$  (10 mL), extracted with  $\text{CH}_2\text{Cl}_2$  (2.0 x 10 mL), and subsequently washed with  $\text{H}_2\text{O}$ , 1M  $\text{H}_2\text{SO}_4$ , and then  $\text{H}_2\text{O}$  (10 mL for each wash). After concentrating under reduced pressure, the crude mixture (0.89 mmol) was dissolved in  $\text{CH}_2\text{Cl}_2$  (27 mL) and cooled to  $0\text{ }^\circ\text{C}$ . To

the reaction mixture, trichloroacetonitrile (1.3 mL, 13 mmol) and DBU (26  $\mu$ L, 0.18 mmol) were added. The reaction was stirred at 0  $^{\circ}$ C for 12 h, quenched with Et<sub>3</sub>N (1.0 mL), and concentrated under reduced pressure. Silica gel flash chromatography (5:1  $\rightarrow$  4:1  $\rightarrow$  3:1 hexanes:EtOAc + 1% Et<sub>3</sub>N) afforded the desired product (770 mg) in 89% yield over two steps. <sup>1</sup>H NMR (600 MHz; CDCl<sub>3</sub>):  $\delta$  8.72 (s, 1H, OCNHCCl<sub>3</sub>), 7.47 – 7.28 (m, 10H, OCH<sub>2</sub>Ph), 6.37 (d,  $J$  = 3.6 Hz, 1H, H-1 of IdoA), 5.24 (d,  $J$  = 4.7 Hz, 1H, H-1 of GlcN), 4.96 (d,  $J$  = 10.5 Hz, 1H, OCH<sub>2</sub>Ph), 4.90 (t,  $J$  = 4.4 Hz, 1H, H-2 of GlcN), 4.75 (d,  $J$  = 11.7 Hz, 1H, OCH<sub>2</sub>Ph), 4.71 (d,  $J$  = 10.5 Hz, 1H, OCH<sub>2</sub>Ph), 4.66 (d,  $J$  = 11.8 Hz, 1H, OCH<sub>2</sub>Ph), 4.63 (d,  $J$  = 4.2 Hz, 1H, H-5 of GlcN), 4.52 (dd,  $J$  = 12.3, 1.8 Hz, 1H, H-6 of GlcN), 4.13 (dd,  $J$  = 12.3, 4.3 Hz, 1H, H-6 of GlcN), 4.08 – 3.98 (m, 3H, H-4 and H-5 of IdoA, H-4 of GlcN), 3.91 (dd,  $J$  = 10.2, 8.5 Hz, 1H, H-3 of IdoA), 3.69 (dd,  $J$  = 10.2, 3.6 Hz, 1H, H-2 of IdoA), 3.66 – 3.61 (m, 1H, H-3 of GlcN), 3.57 (s, 3H, CO<sub>2</sub>CH<sub>3</sub>), 2.89 – 2.69 (m, 2H, COCH<sub>2</sub>CH<sub>2</sub>COCH<sub>3</sub>), 2.67 – 2.54 (m, 2H, COCH<sub>2</sub>CH<sub>2</sub>COCH<sub>3</sub>), 2.18 (s, 3H, COCH<sub>2</sub>CH<sub>2</sub>COCH<sub>3</sub>), 2.01 (s, 3H, COCH<sub>3</sub>), 0.82 (d,  $J$  = 2.5 Hz, 9H, SiC(CH<sub>3</sub>)<sub>3</sub>), -0.05 (s, 3H, SiCH<sub>3</sub>), -0.09 (s, 3H, SiCH<sub>3</sub>); <sup>13</sup>C NMR (125 MHz; CDCl<sub>3</sub>):  $\delta$  206.5, 172.1, 170.2, 170.0, 160.7, 137.7, 137.6, 128.7, 128.2, 128.1, 128.0, 127.9, 127.6, 97.7, 94.4, 78.2, 77.2, 76.7, 75.1, 75.0, 73.0, 72.0, 71.9, 70.2, 69.0, 62.8, 61.9, 51.7, 38.0, 29.9, 28.0, 25.5, 20.1, 17.8, 4.7, 5.4; ESI-TOF HRMS  $m/z$  calcd for C<sub>42</sub>H<sub>55</sub>N<sub>3</sub>O<sub>15</sub>SiCl<sub>3</sub> [M+Na]<sup>+</sup>: 997.2366; found: 997.2415.

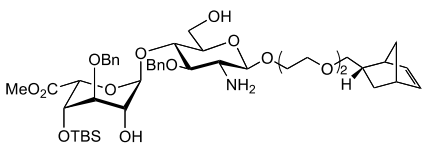

**Methyl 3-O-benzyl-4-O-tert-butyltrimethylsilyl- $\alpha$ -L-idopyranosyluronate-(1 $\rightarrow$ 4)-2-amino-3-O-benzyl-1-O-(2-(2-((2S)-bicyclo[2.2.1]hept-5-en-2-ylmethoxy)ethoxy)ethyl)-2-deoxy- $\alpha$ -D-glucopyranoside (16).** Compound **5** (17 mg, 20  $\mu$ mol) was dissolved in anhydrous MeOH (0.80 mL), and 1,3-propanedithiol (0.14 mL, 60  $\mu$ mol) and DIPEA (0.12 mL, 60  $\mu$ mol) were added dropwise. Upon confirmation of partial disappearance of **5** by TLC, flame-dried K<sub>2</sub>CO<sub>3</sub> (2.4 mg, 20  $\mu$ mol) was added and the reaction mixture was stirred for 24 h at rt. The reaction was quenched with Dowex 5W-X8 (H<sup>+</sup> form), filtered through a pad of Celite, and concentrated under reduced pressure. Silica gel flash chromatography (1:1 hexanes:EtOAc) afforded the desired product (14 mg) in 93% yield. <sup>1</sup>H NMR (500 MHz; CDCl<sub>3</sub>):  $\delta$  7.48 – 7.20 (m, 10H, OCH<sub>2</sub>Ph), 6.17 – 5.88 (m, 2H, CH=CH of Nb), 5.25 (d,  $J$  = 4.5 Hz, 1H, H-1 of IdoA), 4.96 (d,  $J$  = 11.4 Hz, 1H, OCH<sub>2</sub>Ph), 4.83 (d,  $J$  = 11.4 Hz, 1H, OCH<sub>2</sub>Ph), 4.68 – 4.51 (m, 3H, OCH<sub>2</sub>Ph, H-5 of IdoA), 4.32 (d,  $J$  = 8.0 Hz, 1H, H-1 of GlcN), 4.09 – 3.76 (m, 5H, H-6 of IdoA, H-4 of IdoA, H-2 of

IdoA,  $OCH_2$  of PEG linker), 3.76 – 3.53 (m, 10H, H-2 of IdoA, H-6 of IdoA,  $OCH_2$  of PEG linker,  $CO_2CH_3$ ), 3.47 – 3.32 (m, 4H, H-4 of GlcN,  $OCH_2$  of PEG linker, H-5 of GlcN, H-3 of GlcN), 2.84 – 2.68 (m, 3H, H-2 of GlcN,  $CH-CH=CH$  of Nb), 1.69 – 1.63 (m, 1H,  $CH$  of Nb), 1.40 – 1.03 (m, 4H,  $CH_2$  of Nb), 0.82 (s, 9H,  $SiC(CH_3)_3$ ), -0.03 (d,  $J = 7.3$  Hz, 7H,  $SiCH_3$ );  $^{13}C$  NMR (125 MHz;  $CD_3OD$ ):  $\delta$  171.7, 140.1, 139.7, 137.7, 137.5, 129.2, 128.8, 128.4, 104.5, 102.3, 84.1, 79.5, 77.7, 77.0, 75.2, 74.4, 72.8, 71.5, 71.4, 61.8, 57.8, 52.4, 45.8, 44.9, 42.8, 40.1, 30.6, 26.1, 18.7, -4.5, -5.1; ESI-TOF HRMS:  $m/z$  calcd for  $C_{45}H_{66}NO_{13}Si$   $[M-H]^-$  856.4303; found: 856.4326.

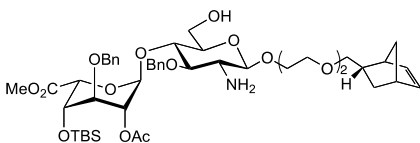

**Methyl 2-O-acetyl-3-O-benzyl-4-O-tert-butyltrimethylsilyl- $\alpha$ -L-idopyranosyluronate-(1 $\rightarrow$ 4)-2-acetylamido-3-O-benzyl-1-O-(2-(2-((2S)-bicyclo[2.2.1]hept-5-en-2-ylmethoxy)ethoxy)ethyl)-2-deoxy- $\alpha$ -D-glucopyranoside (17).** Compound **5** (190 mg, 0.18 mmol) was dissolved in anhydrous MeOH (11 mL). 1,3-propanedithiol (1.1 mL, 5.4 mmol) and DIPEA (1.1 mL, 6.3 mmol) were added dropwise, and the reaction mixture was stirred for 24 h at rt. The reaction was quenched with Dowex 5W-X8 ( $H^+$  form), filtered through a pad of Celite, and concentrated under reduced pressure. Silica gel flash chromatography (30:2:1  $\rightarrow$  20:2:1 EtOAc:MeOH:H<sub>2</sub>O) afforded the desired product (150 mg), and the resulting intermediate was dissolved in pyridine (2.8 mL). To this mixture, a solution of hydrazine monohydrate (1.2 mmol) and AcOH (9.9 mmol) in pyridine (17 mL) was added at rt. The reaction mixture was diluted with  $CH_2Cl_2$  (10 mL), washed with cold water (15 mL), saturated  $NaHCO_3$  (15 mL), water (15 mL), and saturated brine (15 mL). The combined organic fractions were dried over  $MgSO_4$  and concentrated under reduced pressure. Silica gel flash chromatography (20:2:1 EtOAc:MeOH:H<sub>2</sub>O) afforded the desired product (140 mg) in 87% yield over two steps.  $^1H$  NMR (500 MHz;  $CDCl_3$ ):  $\delta$  7.46 – 7.27 (m, 10H,  $OCH_2Ph$ ), 6.14 – 5.98 (m, 2H,  $CH=CH$  of Nb), 5.31 (d,  $J = 4.4$  Hz, 1H, H-1 of IdoA), 4.99 (d,  $J = 11.2$  Hz, 1H,  $OCH_2Ph$ ), 4.88 (q,  $J = 3.6$  Hz, 1H, H-2 of IdoA), 4.80 – 4.68 (m, 2H,  $OCH_2Ph$ , H-5 of IdoA), 4.67 – 4.55 (m, 2H,  $OCH_2Ph$ ), 4.36 (dt,  $J = 8.0, 4.1$  Hz, 1H, H-1 of GlcN), 4.05 – 3.85 (m, 4H, H-4 of IdoA, H-6 of GlcN, H-5 of GlcN,  $OCH_2$  of PEG linker), 3.85 – 3.34 (m, 15H,  $OCH_2$  of PEG linker, H-6 of GlcN, H-3 of IdoA,  $CO_2CH_3$ , H-3 of GlcN, H-4 of GlcN), 2.89 (dd,  $J = 10.0, 7.8$  Hz, 1H, H-2 of GlcN), 2.81 – 2.67 (m, 2H,  $CH-CH=CH$  of Nb), 2.01 (s, 3H,  $OCOCH_3$ ), 1.42 – 1.14 (m, 5H,  $CH$  and  $CH_2$  of Nb), 0.82 (s, 9H,  $SiC(CH_3)_3$ ), -0.08 (d,  $J = 7.3$  Hz, 6H,  $SiCH_3$ );  $^{13}C$  NMR (125 MHz;  $CDCl_3$ ):  $\delta$  170.2, 138.7, 137.8, 136.7, 128.5, 128.1,

127.9, 127.6, 97.8, 76.8, 76.2, 75.7, 75.5, 74.2, 72.7, 72.0, 70.7, 70.4, 69.3, 69.0, 61.7, 56.6, 51.9, 45.1, 43.8, 41.7, 38.9, 38.6, 29.9, 25.7, 21.1, 17.9, -4.5, -5.4; ESI-TOF HRMS:  $m/z$  calcd for  $C_{47}H_{70}NO_{14}Si$  [M-H]<sup>-</sup> 900.4565; found: 900.4568.

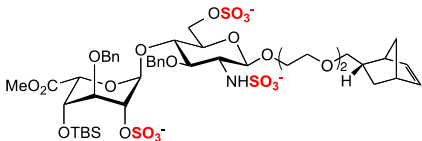

**Methyl 3-*O*-benzyl-2-*O*-sulfonato-4-*O*-*tert*-butyldimethylsilyl- $\alpha$ -L-idopyranosyluronate-(1 $\rightarrow$ 4)-3-*O*-benzyl-1-*O*-(2-(2-((2*S*)-bicyclo[2.2.1]hept-5-en-2-ylmethoxy)ethoxy)ethyl)-2-deoxy-2-sulfonatamido-6-*O*-sulfonato- $\alpha$ -D-glucopyranoside (18).** Compound **16** (9.2 mg, 10  $\mu$ mol) was dissolved in freshly distilled pyridine (1.0 mL) and to this  $SO_3 \cdot Py$  (50 mg, 0.32 mmol) and  $Et_3N$  (0.20 mL) were added. The reaction mixture was stirred at rt for 24 h, refluxed at 50  $^\circ C$  for 24 h, quenched with MeOH (1.0 mL), and concentrated to afford a golden syrup. Purification by Sephadex LH-20 gel filtration (1:1  $CH_2Cl_2$ :MeOH), followed by silica gel flash chromatography (15:2:1  $\rightarrow$  10:2:1  $\rightarrow$  8:2:1 EtOAc:MeOH:H<sub>2</sub>O) gave the desired product (8.7 mg) in 78% yield. <sup>1</sup>H NMR (500 MHz; CD<sub>3</sub>OD):  $\delta$  7.51 – 7.50 (m, 2H, OCH<sub>2</sub>Ph), 7.43 – 7.41 (m, 2H, OCH<sub>2</sub>Ph), 7.37 – 7.34 (m, 2H, OCH<sub>2</sub>Ph), 7.30 – 7.26 (m, 3H, OCH<sub>2</sub>Ph), 7.23 – 7.22 (m, 1H, OCH<sub>2</sub>Ph), 6.11 – 6.04 (m, 2H, CH=CH of Nb), 5.30 (s, H-1 of IdoA), 4.98 (d,  $J$  = 12.5 Hz, 1H, OCH<sub>2</sub>Ph), 4.87 (d,  $J$  = 11.5 Hz, 1H, OCH<sub>2</sub>Ph), 4.78 (d,  $J$  = 6 Hz, 1H, H-1 of GlcN), 4.67 (d,  $J$  = 11.5 Hz, 1H, OCH<sub>2</sub>Ph), 4.59 (d,  $J$  = 12.5 Hz, 1H, OCH<sub>2</sub>Ph), 4.43 (s, 1H, H-2 of IdoA), 4.37 – 4.28 (m, 2H, H-6, H-6 of GlcN), 4.13 – 4.12 (m, 1H, H-4 of GlcN), 4.05 – 4.03 (m, 1H, H-5 of GlcN), 3.96 – 3.93 (m, 1H, H-4 of IdoA), 3.81 – 3.78 (m, 2H, H-3 of IdoA, OCH<sub>2</sub> of PEG linker), 3.73 – 3.71 (m, 2H, OCH<sub>2</sub> of PEG linker), 3.69 – 3.56 (m, 5H, OCH<sub>2</sub> of PEG linker), 3.54 – 3.51 (m, 1H, H-2 of GlcN), 3.45 – 3.35 (m, 2H, OCH<sub>2</sub> of PEG linker), 3.15 (s, 3H, CO<sub>2</sub>CH<sub>3</sub>), 2.77 (s, 1H, CH=CH of Nb), 2.72 (s, 1H, CH-CH=CH of Nb), 2.11 (s, 3H, OCOCH<sub>3</sub>), 1.98 (s, 3H, OCOCH<sub>3</sub>), 1.72 – 1.68 (m, 1H, CH of Nb), 1.38 – 1.21 (m, 3H, CH<sub>2</sub> of Nb), 1.15 – 1.12 (m, 1H, CH<sub>2</sub> of Nb), 0.76 (s, 9H, SiC(CH<sub>3</sub>)), -0.17 (s, 3H, SiCH<sub>3</sub>), -0.24 (s, 3H, SiCH<sub>3</sub>); <sup>13</sup>C NMR (125 MHz; CD<sub>3</sub>OD):  $\delta$  172.8, 141.1, 140.4, 138.7, 131.6, 131.0, 130.6, 130.4, 130.3, 130.2, 130.0, 129.4, 104.3, 100.1, 80.9, 78.0, 77.0, 72.7, 72.4, 71.0, 70.7, 56.2, 53.5, 46.9, 46.0, 43.8, 41.1, 31.7, 27.4, 19.9, -3.0, -4.4; ESI-TOF HRMS:  $m/z$  calcd for  $C_{45}H_{66}NO_{22}S_3Si$  [M-H]<sup>-</sup> 1016.2597; found: 1016.2583.

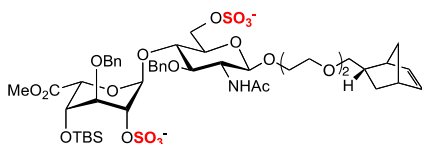

**Methyl 2-*O*-sulfonato-3-*O*-benzyl-4-*O*-*tert*-butyldimethylsilyl- $\alpha$ -L-idopyranosyluronate-(1 $\rightarrow$ 4)-2-acetylamido-3-*O*-benzyl-1-*O*-(2-(2-((2*S*)-bicyclo[2.2.1]hept-5-en-2-ylmethoxy)ethoxy)ethyl)-2-deoxy-6-*O*-sulfonato- $\alpha$ -D-glucopyranoside (19).** To a solution of compound **16** (130 mg, 0.15 mmol) in anhydrous MeOH (8.4 mL) at ambient temperature were added Ac<sub>2</sub>O (0.30 mL, 3.0 mmol) and Et<sub>3</sub>N (0.50 mL). Additional amounts of Ac<sub>2</sub>O (0.30 mL, 3.0 mmol) were added every hour until complete conversion to the desired product was observed by TLC (at least 4 h). The reaction mixture was directly loaded onto a Sephadex LH-20 gel filtration column and eluted with 1:1 CH<sub>2</sub>Cl<sub>2</sub>:MeOH. The *N*-acetylated intermediate was dissolved in freshly distilled pyridine (8.1 mL), and SO<sub>3</sub>•Py (450 mg, 3.3 mmol) and Et<sub>3</sub>N (1.6 mL) were added. The reaction mixture was stirred at rt for 24 h, refluxed at 50 °C for 24 h, quenched with MeOH (5.0 mL), and concentrated to afford a golden syrup. Purification by Sephadex LH-20 gel filtration (1:1 CH<sub>2</sub>Cl<sub>2</sub>:MeOH), followed by silica gel flash chromatography (10:2:1 EtOAc:MeOH:H<sub>2</sub>O) gave the desired product (130 mg) in 85% yield over two steps. <sup>1</sup>H NMR (500 MHz; CD<sub>3</sub>OD):  $\delta$  7.53 – 7.10 (m, 10H, OCH<sub>2</sub>Ph), 6.12 – 5.95 (m, 2H, CH=CH of Nb), 5.35 (s, 1H, H-1 of IdoA), 4.84 (m, 2H, H-5 of IdoA, OCH<sub>2</sub>Ph), 4.73 (d, *J* = 11.2 Hz, 1H, OCH<sub>2</sub>Ph), 4.60 (d, *J* = 11.6 Hz, 1H, OCH<sub>2</sub>Ph), 4.55 (d, *J* = 8.3 Hz, 1H, H-1 of GlcN), 4.52 (dd, *J* = 2.1, 1.1 Hz, 1H, H-2 of IdoA), 4.47 (d, *J* = 11.2 Hz, 1H, OCH<sub>2</sub>Ph), 4.41 (dd, *J* = 11.3, 2.2 Hz, 1H, OCH<sub>2</sub> of PEG linker), 4.29 (dd, *J* = 11.2, 5.0 Hz, 1H, OCH<sub>2</sub> of PEG linker), 4.00 – 3.87 (m, 4H, H-4 of IdoA, H-2 of GlcN, H-3 of GlcN, H-6 of GlcN), 3.86 (t, *J* = 1.8 Hz, 1H, H-3 of IdoA), 3.79 – 3.48 (m, 11H, H-6 of GlcN, OCH<sub>2</sub> of PEG linker, H-4 of GlcN, H-5 of GlcN), 3.46 – 3.36 (m, 1H, OCH<sub>2</sub> of PEG linker), 3.33 (s, 3H, CO<sub>2</sub>CH<sub>3</sub>), 2.74 (d, *J* = 31.6 Hz, 2H, CH-CH=CH of Nb), 1.85 (d, *J* = 1.2 Hz, 3H, NHCOCH<sub>3</sub>), 1.67 (d, *J* = 4.5 Hz, 1H, CH of Nb), 1.39 – 1.04 (m, 4H, CH<sub>2</sub> of Nb), 0.78 (d, *J* = 1.2 Hz, 9H, SiC(CH<sub>3</sub>)), -0.11 (dd, *J* = 47.6, 1.1 Hz, 6H, SiCH<sub>3</sub>); <sup>13</sup>C NMR (125 MHz; CD<sub>3</sub>OD):  $\delta$  173.3, 172.1, 139.7, 139.2, 137.7, 137.5, 129.9, 129.5, 129.1, 128.6, 102.6, 99.2, 82.3, 77.1, 76.2, 75.7, 75.3, 74.1, 72.8, 71.5, 71.4, 70.1, 69.7, 67.8, 56.5, 52.4, 45.9, 44.9, 42.8, 40.0, 30.7, 26.2, 23.0, 18.9, -4.2, -5.4; ESI-TOF HRMS: *m/z* calcd for C<sub>47</sub>H<sub>67</sub>NO<sub>20</sub>NaSi<sub>2</sub> [M+Na]<sup>+</sup> 1080.3365; found: 1080.3392.

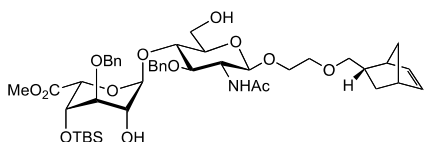

**Methyl 3-O-benzyl-4-O-tert-butyltrimethylsilyl- $\alpha$ -L-idopyranosyluronate-(1 $\rightarrow$ 4)-2-acetyl-amido-3-O-benzyl-1-O-(2-(2-((2S)-bicyclo[2.2.1]hept-5-en-2-ylmethoxy)ethoxy)ethyl)-2-deoxy- $\alpha$ -D-glucopyranoside (20).** To a solution of compound **16** (130 mg, 0.15 mmol) in anhydrous MeOH (8.4 mL) at ambient temperature were added Ac<sub>2</sub>O (0.30 mL, 3.0 mmol) and Et<sub>3</sub>N (0.50 mL). Additional amounts of Ac<sub>2</sub>O (0.30 mL, 3.0 mmol) were added every hour until complete conversion to the desired product was observed by TLC (at least 4 h). Purification by Sephadex LH-20 gel filtration (1:1 CH<sub>2</sub>Cl<sub>2</sub>:MeOH), followed by silica gel flash chromatography (20:2:1 EtOAc:MeOH:H<sub>2</sub>O) gave the desired product (140 mg) in quantitative yield. <sup>1</sup>H NMR (600 MHz; CDCl<sub>3</sub>):  $\delta$  7.36 – 7.09 (m, 10H, OCH<sub>2</sub>Ph), 6.12 – 5.87 (m, 2H, CH=CH of Nb), 5.11 (s, 1H, H-1 of IdoA), 4.76 – 4.72 (m, 1H, H-1 of GlcN), 4.70 (t, *J* = 2.7 Hz, 1H, H-4 of IdoA), 4.68 – 4.56 (m, 2H, OCH<sub>2</sub>Ph), 4.51 – 4.43 (m, 2H, OCH<sub>2</sub>Ph), 4.00 – 3.92 (m, 1H, H-3 of IdoA), 3.91 – 3.80 (m, 2H, OCH<sub>2</sub> of PEG linker, H-6 of GlcN), 3.80 – 3.17 (m, 19H, H-6 of GlcN, H-2 of GlcN, H-3 of GlcN, H-4 of GlcN, H-5 of GlcN, H-2 of IdoA, H-5 of IdoA, OCH<sub>2</sub> of PEG linker, CO<sub>2</sub>CH<sub>3</sub>), 2.75 – 2.46 (m, 2H, CH-CH=CH of Nb), 1.67 (d, *J* = 4.2 Hz, 3H, NHCOCH<sub>3</sub>), 1.64 – 1.53 (m, 1H, CH of Nb), 1.30 – 1.13 (m, 4H, CH<sub>2</sub> of Nb), 0.71 (s, 9H, SiC(CH<sub>3</sub>)), -0.15 (d, *J* = 9.3 Hz, 6H, SiCH<sub>3</sub>); <sup>13</sup>C NMR (125 MHz; CDCl<sub>3</sub>):  $\delta$  170.4, 169.7, 138.6, 137.5, 136.8, 136.6, 128.8, 128.4, 128.2, 127.4, 107.3, 101.6, 100.9, 78.7, 77.0, 76.4, 75.7, 75.5, 72.6, 72.5, 71.0, 70.7, 70.4, 69.8, 69.1, 68.8, 67.2, 62.7, 52.1, 45.2, 43.8, 41.7, 38.8, 30.0, 29.9, 25.6, 23.3, 17.9, -4.7, -5.4; ESI-TOF HRMS: *m/z* calcd for C<sub>47</sub>H<sub>69</sub>NaNO<sub>14</sub>Si [M+Na]<sup>+</sup> 922.4380; found: 922.4385.

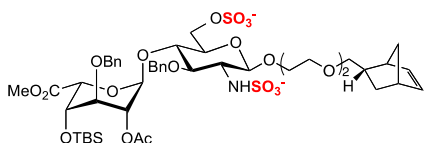

**Methyl 2-O-acetyl-3-O-benzyl-4-O-tert-butyltrimethylsilyl- $\alpha$ -L-idopyranosyluronate-(1 $\rightarrow$ 4)-3-O-benzyl-1-O-(2-(2-((2S)-bicyclo[2.2.1]hept-5-en-2-ylmethoxy)ethoxy)ethyl)-2-deoxy-2-sulfonatamido-6-O-sulfonato- $\alpha$ -D-glucopyranoside (21).** To a solution of compound **17** (22 mg, 0.020 mmol) in freshly distilled pyridine (2.3 mL) were added SO<sub>3</sub>•Py (110 mg, 0.60 mmol) and Et<sub>3</sub>N (0.5 mL). The reaction mixture was stirred at rt for 24 h and refluxed at 50 °C for 24 h, quenched with MeOH (1.0 mL), and concentrated to afford a golden syrup. Purification by Sephadex LH-20 gel filtration (1:1 CH<sub>2</sub>Cl<sub>2</sub>:MeOH), followed by silica gel flash chromatography

(15:2:1 → 10:2:1 EtOAc:MeOH:H<sub>2</sub>O) gave the desired product (26 mg) in 78% yield. <sup>1</sup>H NMR (600 MHz; CD<sub>3</sub>OD): δ 7.79 – 7.03 (m, 10H, OCH<sub>2</sub>Ph), 6.25 – 5.94 (m, 2H, CH=CH of Nb), 5.31 (d, *J* = 4.4 Hz, 1H, H-1 of IdoA), 5.05 – 4.76 (m, 4H, H-2 of IdoA, H-5 of IdoA, OCH<sub>2</sub>Ph), 4.75 – 4.64 (m, 1H, OCH<sub>2</sub>Ph), 4.65 – 4.47 (m, 2H, OCH<sub>2</sub>Ph, H-1 of GlcN), 4.38 (m, 1H, H-6 of GlcN), 4.20 (m, 1H, H-6 of GlcN), 4.07 – 3.85 (m, 4H, H-2 of IdoA, H-2 of GlcN, H-2 of GlcN, OCH<sub>2</sub> of PEG linker), 3.86 – 3.71 (m, 1H, OCH<sub>2</sub> of PEG linker), 3.71 – 3.45 (m, H, 11H, H-3 of IdoA, H-3 of GlcN, H-5 of GlcN, OCH<sub>2</sub> of PEG linker), 3.40 (s, 3H, CO<sub>2</sub>CH<sub>3</sub>), 2.81 – 2.74 (m, 2H, CH-CH=CH of Nb), 2.07 (s, 3H, OCOCH<sub>3</sub>), 1.52 – 1.10 (m, 5H, CH and CH<sub>2</sub> of Nb), 0.83 (s, 9H, SiC(CH<sub>3</sub>)), -0.09 (s, 3H, SiCH<sub>3</sub>), -0.13 (s, 3H, SiCH<sub>3</sub>); <sup>13</sup>C NMR (125 MHz; CDCl<sub>3</sub>): δ 173.3, 172.0, 171.8, 139.8, 139.1, 137.7, 137.5, 102.8, 99.2, 82.1, 79.8, 77.1, 76.6, 76.2, 75.9, 75.3, 75.2, 73.2, 71.5, 71.4, 71.3, 71.0, 70.1, 69.8, 69.4, 67.3, 56.3, 52.4, 45.9, 44.9, 42.8, 40.0, 37.4, 36.0, 30.7, 23.0, 21.2, 18.7, -4.3, -5.4; ESI-TOF HRMS: *m/z* calcd for C<sub>47</sub>H<sub>67</sub>NO<sub>20</sub>NaSi<sub>2</sub> [M+Na]<sup>+</sup> 1080.3365; found: 1080.3392.

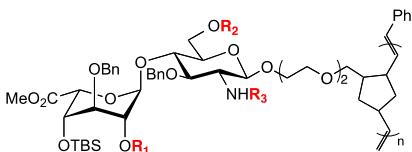

**Protected HS glycopolymers (22 – 25).** Monomers **18 – 21** were converted into polymers **22 – 25**, which contain the following functional groups: R<sub>1</sub> = SO<sub>3</sub><sup>-</sup>, R<sub>2</sub> = SO<sub>3</sub><sup>-</sup>, R<sub>3</sub> = SO<sub>3</sub><sup>-</sup> (**1**); R<sub>1</sub> = SO<sub>3</sub><sup>-</sup>, R<sub>2</sub> = SO<sub>3</sub><sup>-</sup>, R<sub>3</sub> = Ac<sup>-</sup> (**2**); R<sub>1</sub> = H, R<sub>2</sub> = H, R<sub>3</sub> = Ac (**3**); R<sub>1</sub> = H, R<sub>2</sub> = SO<sub>3</sub><sup>-</sup>, R<sub>3</sub> = SO<sub>3</sub><sup>-</sup> (**4**). In a typical polymerization, a small vial was charged with monomer (**18 – 21**; 6.0 mg, 5.0 μmol) and a small stir bar under the flow of argon. To this was added degassed dichloroethane (DCE)/MeOH (10:1, 0.025 M) and *bis*-pyridine Grubbs catalyst ((H<sub>2</sub>IMes)(Py)<sub>2</sub>(Cl)<sub>2</sub>Ru=CHPh)<sup>4</sup> in DCE (5 mg/mL stock solution, 24 μL, 0.11 μmol) by syringe at rt. The reaction mixture was stirred at rt for 1 h, quenched with ethyl vinyl ether (0.10 mL), and diluted with diethyl ether (1.0 mL) and hexanes (0.50 mL) to obtain a white precipitate. The mixture was centrifuged to remove the organic layer, and the resulting white solid (83 – 98% conversion) was dried *in vacuo*. <sup>1</sup>H NMR confirmed disappearance of the norbornene olefinic peaks at 6.04 – 6.11 ppm. The protected polymers were characterized by size exclusion chromatography multi-angle light scattering (SEC-MALS) using a system equipped with an MZ-Gel SDplus organic column (10E5Å, MZ Analysentechnik), a light scattering detector (miniDAWN, Wyatt Technology), and a refractive index detector (TREOS, Wyatt Technology), and 0.2 M LiBr in DMF as the mobile phase. <sup>1</sup>H NMR (500 MHz; D<sub>2</sub>O): δ 7.49 – 7.15 (m, 10H), 5.42 (br, 1H), 5.18 (br, 1H), 4.75 (br, 1H), 4.65 – 4.51 (m, 2H), 4.38 (br, 1H), 4.05 – 3.84 (m, 4H), 3.86 (br, 1H), 3.79 – 3.50 (m, 13H), 3.46 (br,



1H), 3.31 (br, 3H) 3.30 – 3.25 (m, 2H), 2.49 (br, 2H), 1.94 (br, 3H), 1.79 – 1.07 (m, 5H), 0.77 (br, 9H), -0.07 (br, 3H), -0.17 (br, 3H).

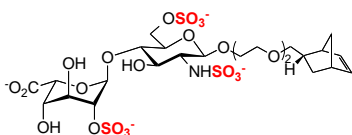

**2-O-Sulfonato- $\alpha$ -L-idopyranosyluronate-(1 $\rightarrow$ 4)-1-O-(2-(2-((2S)bicyclo[2.2.1]hept-5-en-2-ylmethoxy)ethoxy)ethyl)-2-deoxy-2-sulfonamido-6-O-sulfonato- $\alpha$ -D-glucopyranoside (26).**

Compound **18** (14 mg, 0.013 mmol) was dissolved in THF (1.3 mL), and TMSOK (33 mg, 0.26 mmol) was added to the reaction mixture. The reaction was stirred for 24 h at rt and quenched with MeOH (1.0 mL). The crude reaction mixture was loaded directly onto a Sephadex G-25 gel filtration column and eluted with 100% H<sub>2</sub>O, and fractions were combined, lyophilized, and subjected to hydrogenation. The intermediate was dissolved in a 3:2 mixture of 80 mM phosphate buffered saline (2.4 mL, pH = 7.0) and MeOH (0.80 mL). To this, Pd(OH)<sub>2</sub>/charcoal (80 mg, 8x by weight of starting material) was added, and the reaction was carried out under 1 atm H<sub>2</sub> gas for 3 d. The reaction mixture was filtered using a vacuum filtration system (0.45  $\mu$ m PES membrane, VWR) and desalted on a Sephadex G-25 column in 100% H<sub>2</sub>O to obtain the desired product 60% yield after lyophilization. <sup>1</sup>H NMR (500 MHz, D<sub>2</sub>O)  $\delta$  5.24 (s, 1H, H-1 of IdoA), 4.83 (d,  $J$  = 2.7 Hz, 1H, H-5 of IdoA), 4.73 (d,  $J$  = 8.2 Hz, 1H, H-1 of GlcN), 4.44 (m, 1H, H-6 of GlcN), 4.34 (m, 2H, H-6 of GlcN, H-2 of IdoA), 4.10 (m, 2H, H-3 of IdoA, H-4 of IdoA), 4.01 – 3.71 (m, 11H, OCH<sub>2</sub> of PEG linker, H-3 of GlcN, H-4 of GlcN, H-5 of GlcN), 3.44 – 3.31 (m, 2H, OCH<sub>2</sub> of PEG linker), 3.16 (m, 1H, H-2 of GlcN), 2.28 – 2.20 (m, 2H, bridgehead CH<sub>2</sub> of Nb), 1.82 (s, 2H, CH<sub>2</sub> of Nb), 1.59 (s, 2H, CH<sub>2</sub> of Nb), 1.48 – 1.36 (m, 2H, CH of Nb), 1.27 – 1.19 (m, 2H, CH<sub>2</sub> of Nb), 1.08 (s, 1H, CH of Nb); ESI-TOF HRMS:  $m/z$  calcd for C<sub>24</sub>H<sub>37</sub>Na<sub>3</sub>NO<sub>22</sub>S<sub>3</sub> [M+3Na-H]<sup>2+</sup> 856.0662; found: 856.0624.

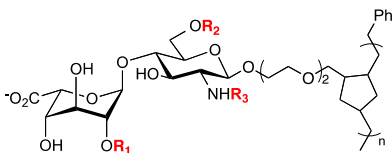

**Deprotected HS glycopolymers (1 – 4).** Polymers **22 – 25** were deprotected to obtain final polymers **1 – 4**, which contain the following functional groups: R<sub>1</sub> = SO<sub>3</sub><sup>-</sup>, R<sub>2</sub> = SO<sub>3</sub><sup>-</sup>, R<sub>3</sub> = SO<sub>3</sub><sup>-</sup> (**1**); R<sub>1</sub> = SO<sub>3</sub><sup>-</sup>, R<sub>2</sub> = SO<sub>3</sub><sup>-</sup>, R<sub>3</sub> = Ac<sup>-</sup> (**2**); R<sub>1</sub> = H, R<sub>2</sub> = H, R<sub>3</sub> = Ac (**3**); R<sub>1</sub> = H, R<sub>2</sub> = SO<sub>3</sub><sup>-</sup>, R<sub>3</sub> = SO<sub>3</sub><sup>-</sup> (**4**). In a typical reaction, polymer (11 mg, 10  $\mu$ mol per unit) was dissolved in THF (1.0 mL), and

TBAI (7.0 mg, 20  $\mu$ mol) and TMSOK (25 mg, 0.20 mmol) were added. The reaction was stirred for 24 h at rt and quenched with MeOH (1.0 mL). The crude reaction mixture was loaded directly onto a Sephadex G-25 gel filtration column and eluted with 100% H<sub>2</sub>O. The polymer-containing fractions were combined, lyophilized, and subjected to hydrogenation. In a typical hydrogenation reaction, the polymer from the previous reaction was dissolved in a 3:2 mixture of 80 mM phosphate buffered saline (0.9 mL, pH = 7.0) and MeOH (0.60 mL). To this, Pd(OH)<sub>2</sub>/charcoal (84 mg, 8x weight of polymer) was added, and the reaction was carried out under 1 atm H<sub>2</sub> gas for 3 d. Samples were filtered using a vacuum filtration system (0.45  $\mu$ m PES membrane, VWR) and desalted on a Sephadex G-25 column in 100% H<sub>2</sub>O to obtain the desired polymers in 35 – 55% yield after lyophilization. <sup>1</sup>H NMR showed disappearance of the benzyl and methyl ester peaks at 7.79 – 7.03 ppm and 3.40 ppm, respectively. Deprotected polymers were characterized by SEC-MALS using a system equipped with an OHPak water column (SB-804 HQ, Shodex), a light scattering detector (miniDAWN, Wyatt Technology), and a refractive index detector (TREOS, Wyatt Technology), and 3 mM NaN<sub>3</sub> and 6 mM NaNO<sub>3</sub> in H<sub>2</sub>O as the mobile phase. <sup>1</sup>H NMR (500 MHz; D<sub>2</sub>O):  $\delta$  5.03 (br, 1H), 4.44 (br, 1H), 4.25 – 4.20 (m, 1H), 4.18 – 4.11 (m, 2H), 3.92 (br, 1H), 3.84 (br, 2H), 3.75 – 3.40 (m, 12H), 3.34 (br, 1H), 3.19 (br, 1H), 1.91 (br, 3H), 1.72 (br, 1H), 1.48 – 0.88 (m, 6H).

### ***3-3. Direct and Competitive Enzyme-Linked Immunosorbent Assay (ELISA)***

A 96-well heparin-binding plate (BD Biosciences) was coated with 25  $\mu$ g/mL of heparin (Neoparin) for 12 h at rt. Wells were rinsed with phosphate-buffered saline (PBS) and blocked with 10% fetal bovine serum (FBS) in PBS for 1 h at 37 °C. For the direct ELISA, various concentrations of RANTES (0.50 – 1024 nM; R&D Systems) were serially diluted in 1% BSA in PBS and incubated in each well for 1.5 h at 37 °C. For the competitive ELISA, RANTES (at 12 nM, the pre-determined EC<sub>50</sub>; Figure S1) was pre-incubated (3 h, 37 °C) with various concentrations of heparin (0.010 – 40  $\mu$ g/mL) or glycopolymers **1** – **4** (0.10 – 180  $\mu$ g/mL), and the co-mixture was added to the 96-well plate for 1.5 h at 37 °C. Wells were washed three times with PBST (PBS + 0.1% Tween-20), incubated with a mouse anti-RANTES antibody (R&D Systems) for 1 h at 37 °C, washed three times with PBST, and incubated with a horseradish peroxidase (HRP)-conjugated anti-mouse IgG antibody (GE Healthcare Life Sciences) for 1 h at 37 °C. After three washes with PBST, RANTES binding was detected using a 3,3',5,5'-tetramethylbenzidine (TMB) substrate kit (Thermo Scientific) according to the manufacturer's instructions. Fluorescence was measured at 450 nm using a Victor 3 plate reader (PerkinElmer). The half-maximal effective concentration (EC<sub>50</sub>) and half maximal inhibitory concentration (IC<sub>50</sub>)

were calculated using KaleidaGraph software (Synergy). IC<sub>50</sub> values reported in the paper are for both the mass and molar concentrations of antagonist. IC<sub>50</sub> values were also corrected for ligand valence (Table S2) by calculating the mass percentage of the disaccharide epitope contributing to each disaccharide-norbornyl linker unit, and then dividing by the molecular weight of the disaccharide epitope.

### ***3-4. Cell Culture***

L1.2 cells (mouse pre-B lymphocytes) stably transfected with CCR3, CCR5, or vector only, were kindly provided by Dr. Osamu Yoshie (Kinki University, School of Medicine, Japan). Cells were maintained in RPMI 1640 (Invitrogen) supplemented with 10% FBS, 100 µg/mL penicillin/streptomycin (Invitrogen), and 50 µM 2-mercaptoethanol (Sigma Aldrich). Cells were routinely analyzed by flow cytometry (FACSCalibur, Beckman Dickinson; see section 2-6) to verify that cultures expressed adequate levels of chemokine receptor (>90%) for migration and cell binding assays.

### ***3-5. Cell Migration Assay***

Experiments were performed using ChemoTx chambers (Neuroprobe). L1.2 cells (wild-type or stably-transfected with CCR3 or CCR5) were harvested and washed twice in flow cytometry buffer (Hank's Balanced Salt Solution (HBSS) with 2.5 mg/mL bovine serum albumin (BSA) and 10 mM HEPES). Human RANTES (R&D Systems) was serially diluted in flow cytometry buffer (0.5 – 1024 nM), and 30 µL of each dilution was added to the bottom wells of the ChemoTx chamber. Alternatively, in competitive migration assays, 1 or 10 nM of RANTES was pre-incubated with various concentrations of heparin or glycopolymer **1** (0.020 – 4.0 µg/mL) for 30 min at rt, and the same volume of each solution was added to the bottom wells. The sample plate was fitted with a 5-µm pore filter, and 10<sup>6</sup> cells (50 µL) were placed on top of each well. Cells were allowed to migrate through the filter for 4 h at 37 °C and 5% CO<sub>2</sub>. Subsequently, non-migrating cells were removed from the top of the filter by manual scraping; cells adhering to the filter were dislodged using 20 µL of 2.5 mM EDTA for 30 min at rt. Migrated cells were transferred (500 x g, 5 min) to a 96-well black-walled clear-bottomed plate (Corning) using a funnel plate (Neuroprobe). Cells were lysed at -80 °C and stained with CyQUANT dye (Invitrogen) as described in the product literature. Fluorescence was measured at 535 nm using a Victor 3 plate reader (PerkinElmer).

### **3-6. Chemokine Cell Binding Assay**

3 x 10<sup>6</sup> L1.2 cells (wild-type or stably-transfected with CCR3) were washed twice with flow cytometry buffer and incubated with RANTES (100 nM in flow cytometry buffer) for 45 min at rt. Alternatively, cells were incubated with RANTES (100 nM in flow cytometry buffer) previously treated with various concentrations of heparin or glycopolymer **1** (0.02 – 2 µg/mL) for 30 min at rt. Cells were spun twice (500 x g, 5 min) through 100% FBS (1.0 mL) to remove excess reagent and stained with phycoerythrin (PE)-conjugated anti-RANTES (1 test) in FACS buffer (100 µL) for 1 h at 4 °C. Cells were again spun twice through 100% FBS (1.0 mL) and resuspended in flow cytometry buffer (500 µL) for flow cytometry analysis. Immediately before analysis, 7-amino-actinomycin-D (7-AAD, 5 µL, eBioscience) was added to evaluate cell viability. Cells were analyzed for PE intensity on a FACSCalibur flow cytometer (Beckman Dickinson, Caltech Flow Cytometry Facility) with 10,000 cell events per sample. Data analysis was performed using FlowJo (Tree Star Inc.).

### **3-7. Chromogenic Assay for the Measurement of Antithrombin Activity**

**Factor Xa Activity:** The BIOPHEN Heparin Anti-Xa (2 stages) USP/EP kit (Aniara) was used to determine factor Xa activity. This chromogenic anti-Xa method for measuring homogeneous heparin in purified systems is in compliance with Pharmacopoeias (USP, EP) and FDA guidelines. All reagents were prepared according to manufacturer's instructions and incubated at 37 °C for 15 min. Varying concentrations of heparin (Neoparin) or glycopolymers **1 – 4** (40 uL) and antithrombin (40 uL) were added to a microcentrifuge tube, mixed, and incubated at 37 °C for 2 min. Factor Xa (40 uL) was added to the solution, incubated at 37 °C for exactly 2 min, and then the factor Xa chromogenic substrate (40 µL) was added. After 2 min, the reaction was quenched with citric acid (20 g/L, 240 µL), and the absorbance was measured at 405 nm. The sample blank was obtained by mixing the reagents in reverse order, and the resulting value was deducted from the absorbance values measured in the assay.

**Thrombin (Factor IIa) Activity:** The BIOPHEN Heparin Anti-IIa (2 stages) USP/EP kit (Aniara) was used to determine factor IIa activity. This chromogenic anti-IIa method was conducted according to the same procedure used for factor Xa.

#### 4. References

- (1) (a) Orgueira, H. A.; Bartolozzi, A.; Schell, P.; Litjens, R. E. J. N.; Palmacci, E. R.; Seeberger, P. H. *Chem. Eur. J.* **2003**, *9*, 140. (b) Lohman, G. J. S.; Hunt, D. K.; Hogermeier, J. A.; Seeberger, P. H. *J. Org. Chem.* **2003**, *68*, 7559.
- (2) Lee, S. G.; Brown, J. M.; Rogers, C. J.; Matson, J. B.; Krishnamurthy, C.; Rawat, M.; Hsieh-Wilson, L. C. *Chem. Sci.* **2010**, *1*, 322.
- (3) Gavard, O.; Hersant, Y.; Alais, J.; Duverger, V.; Dilhas, A.; Bascou, A.; Bonnaffe, D. *Eur. J. Org. Chem.* **2003**, *2003*, 3603.
- (4) Scholl, M.; Ding, S.; Lee, C. W.; Grubbs, R. H. *Org. Lett.* **1999**, *1*, 953.

### 5. Nuclear Magnetic Resonance (NMR) Spectra

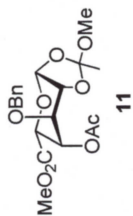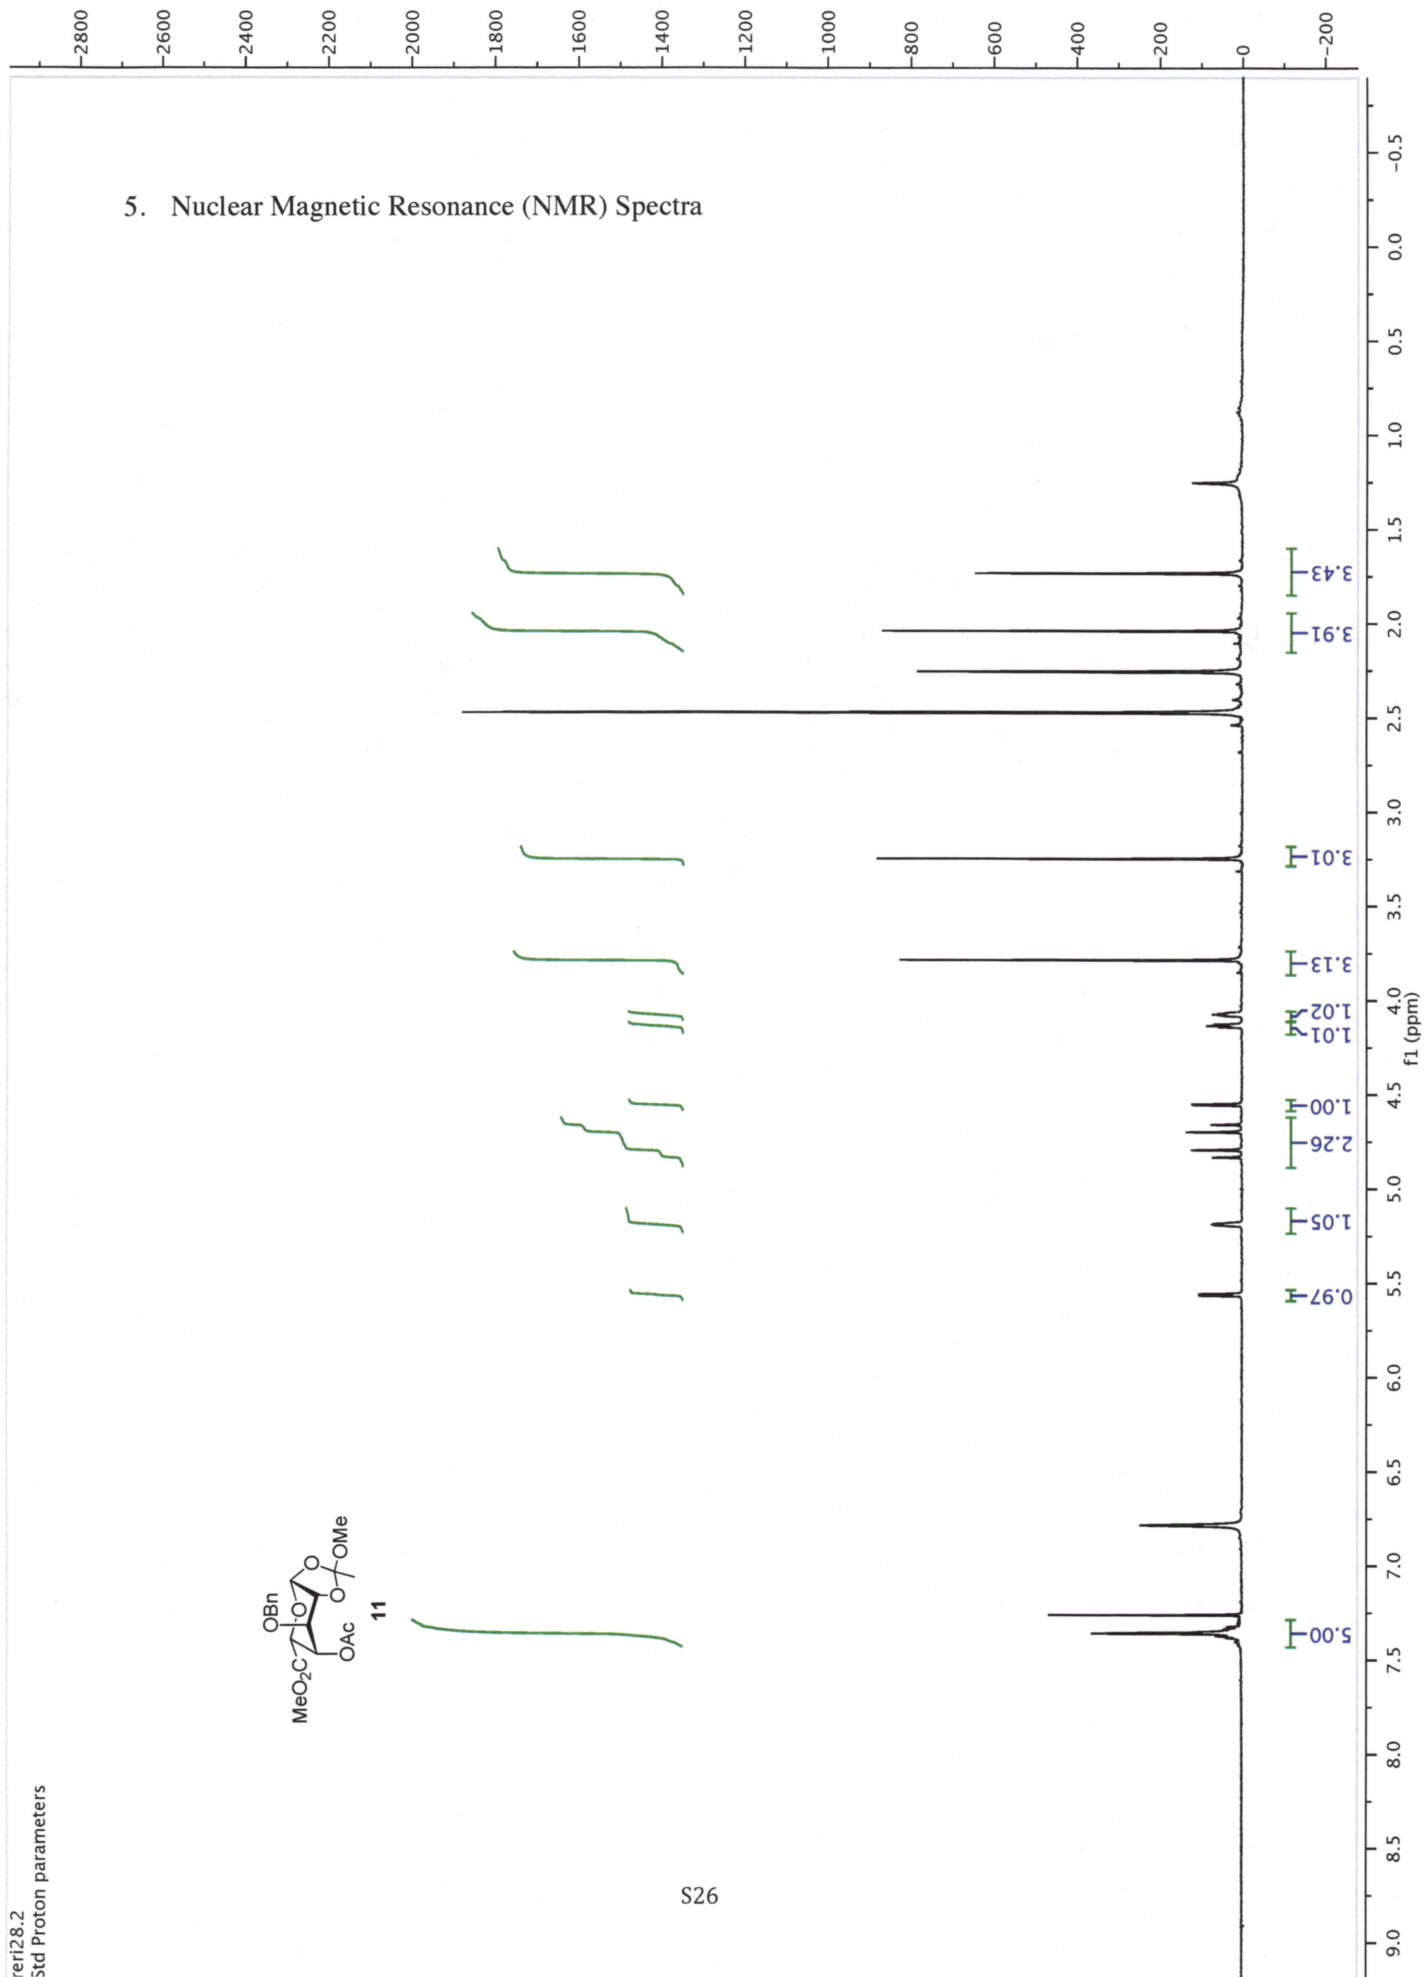

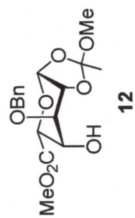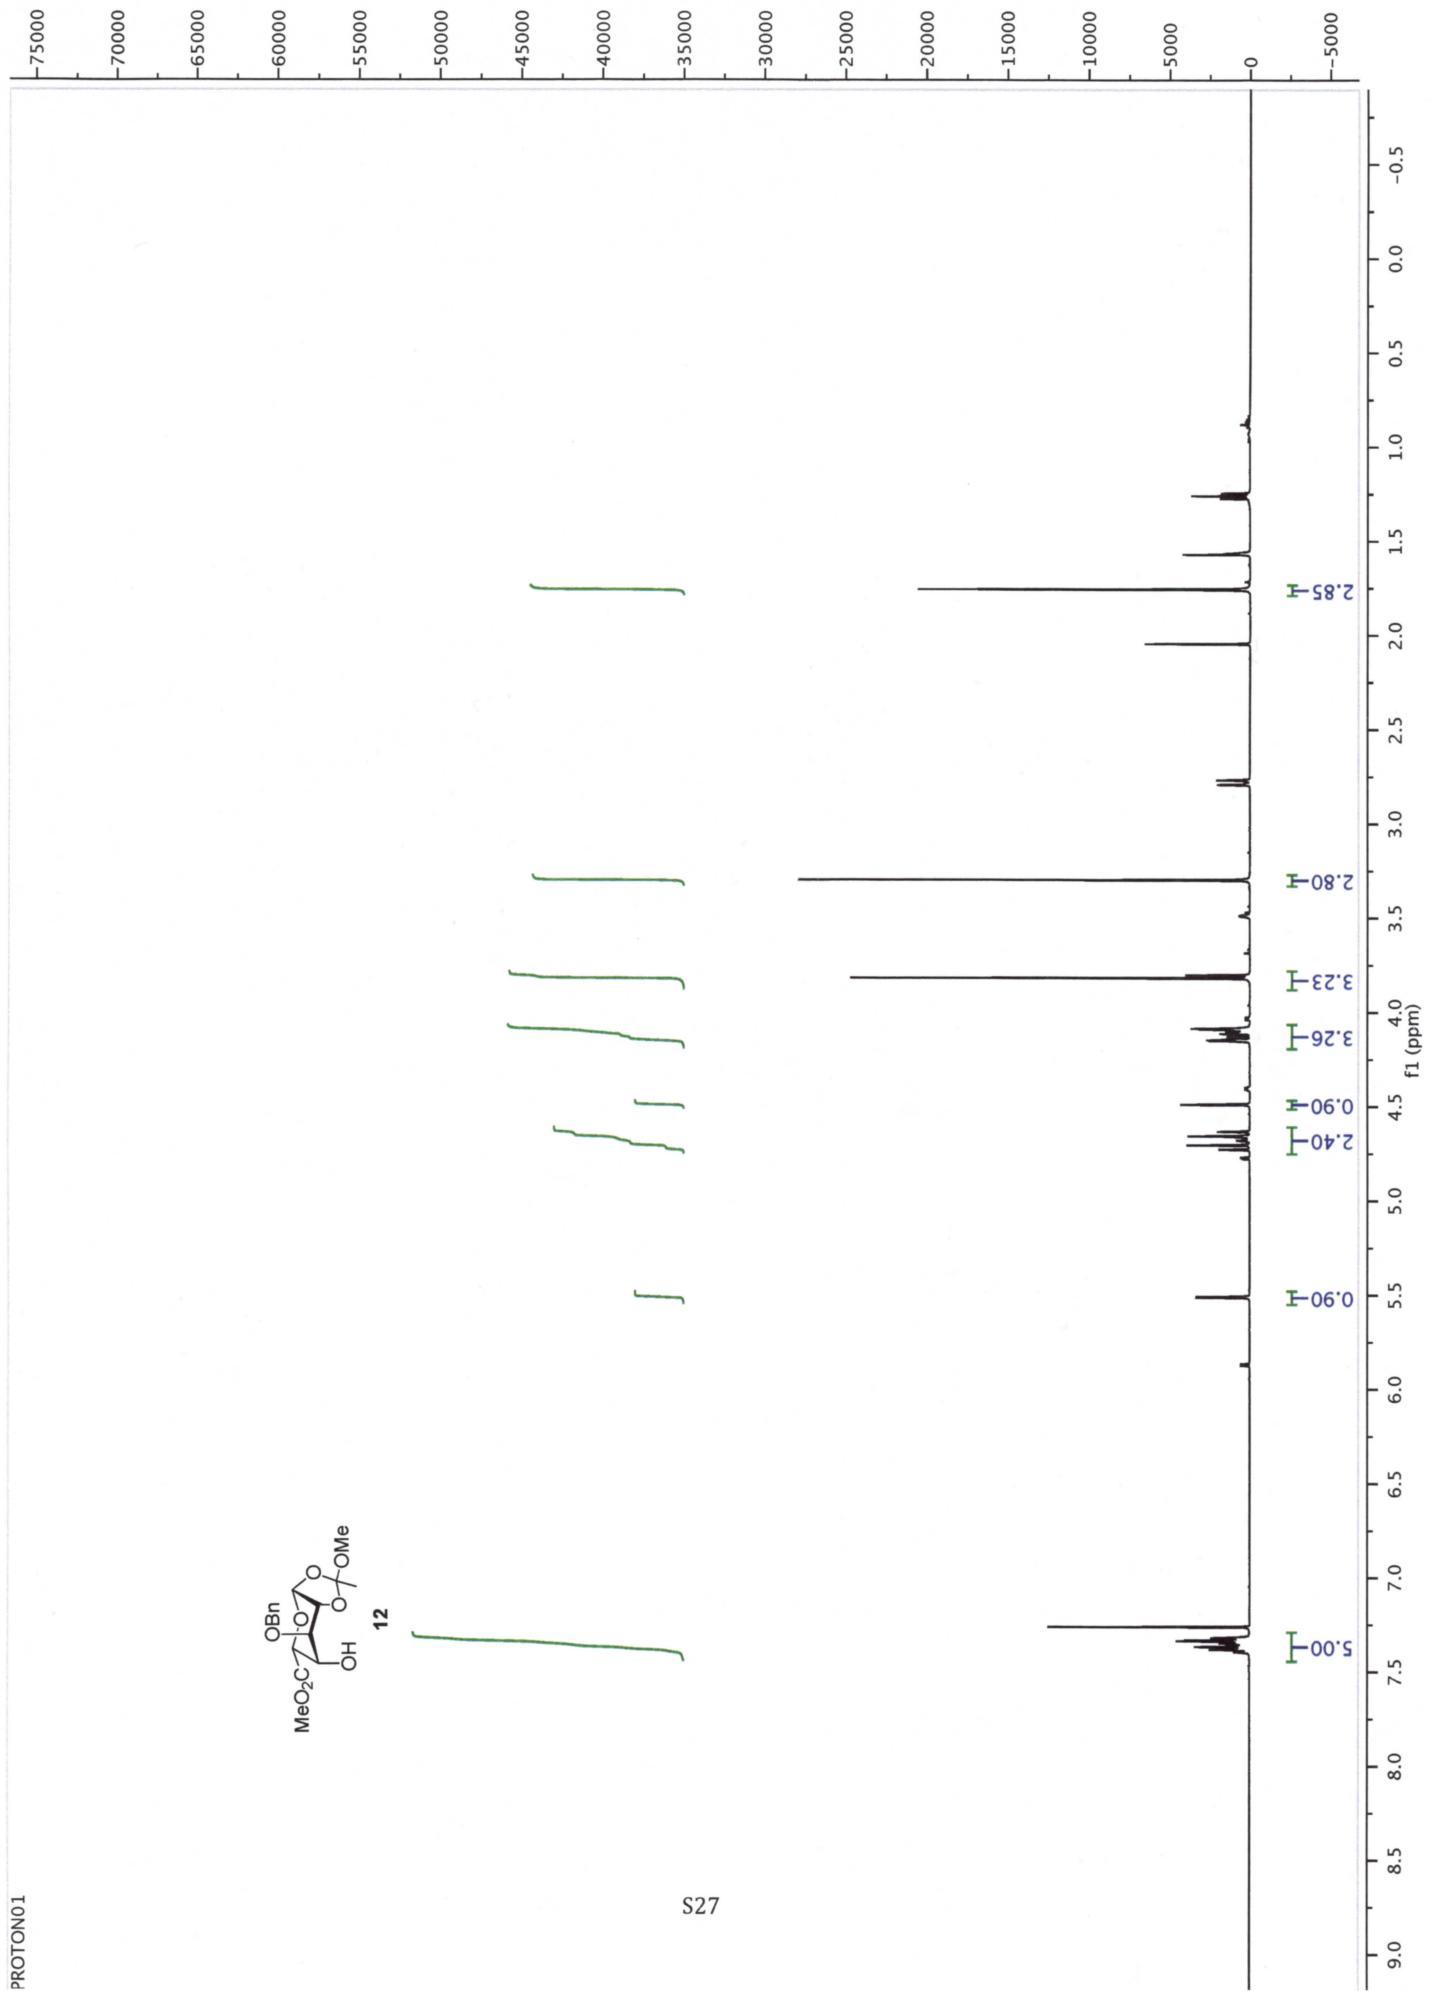

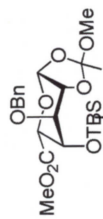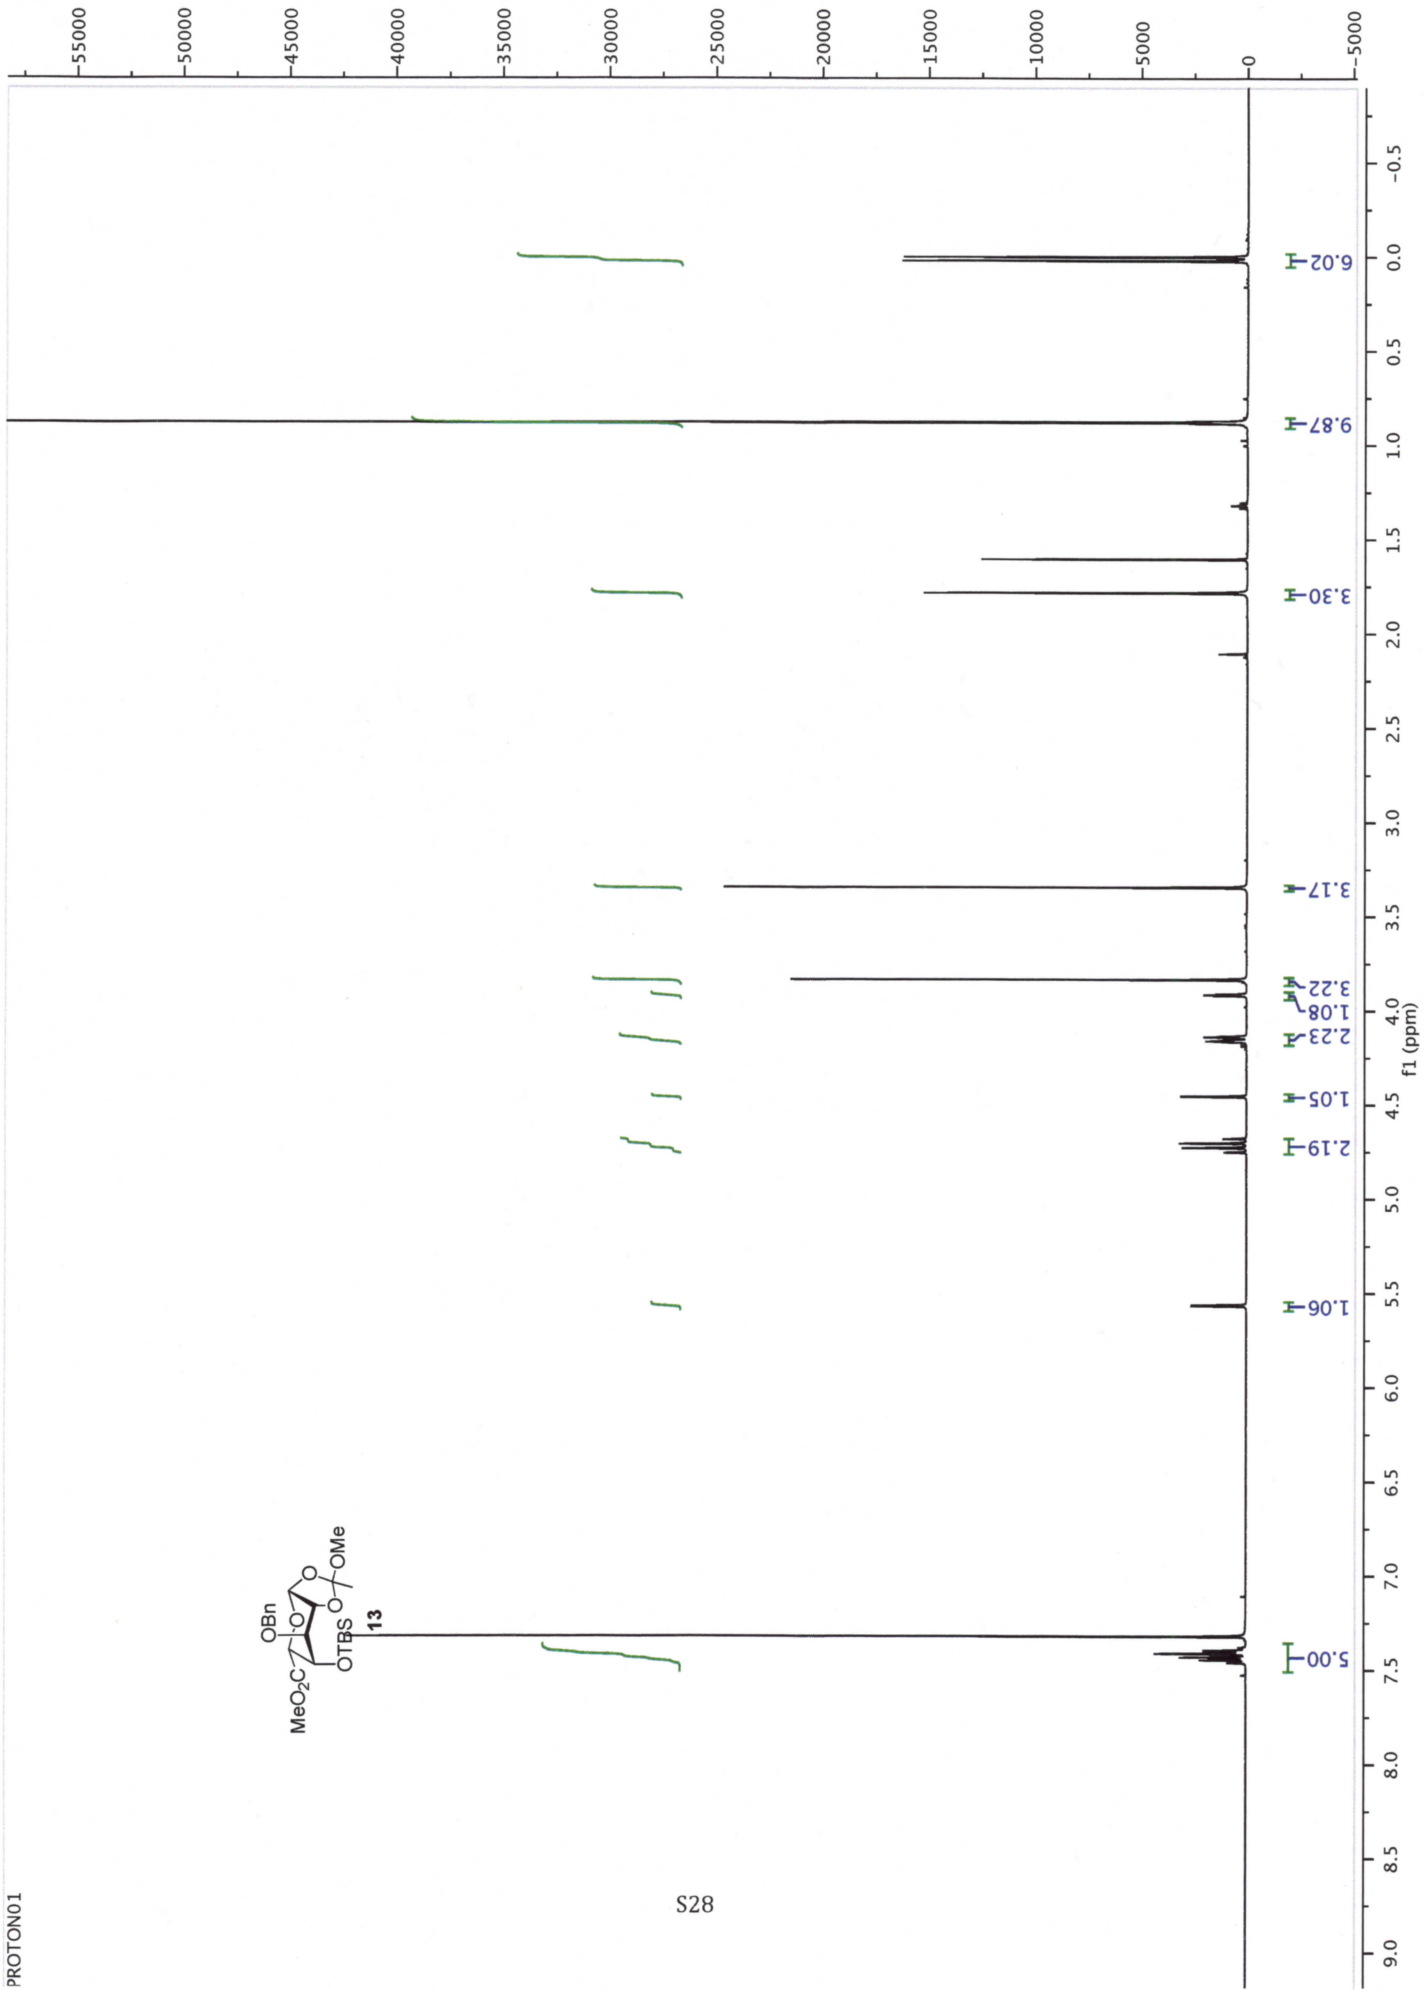



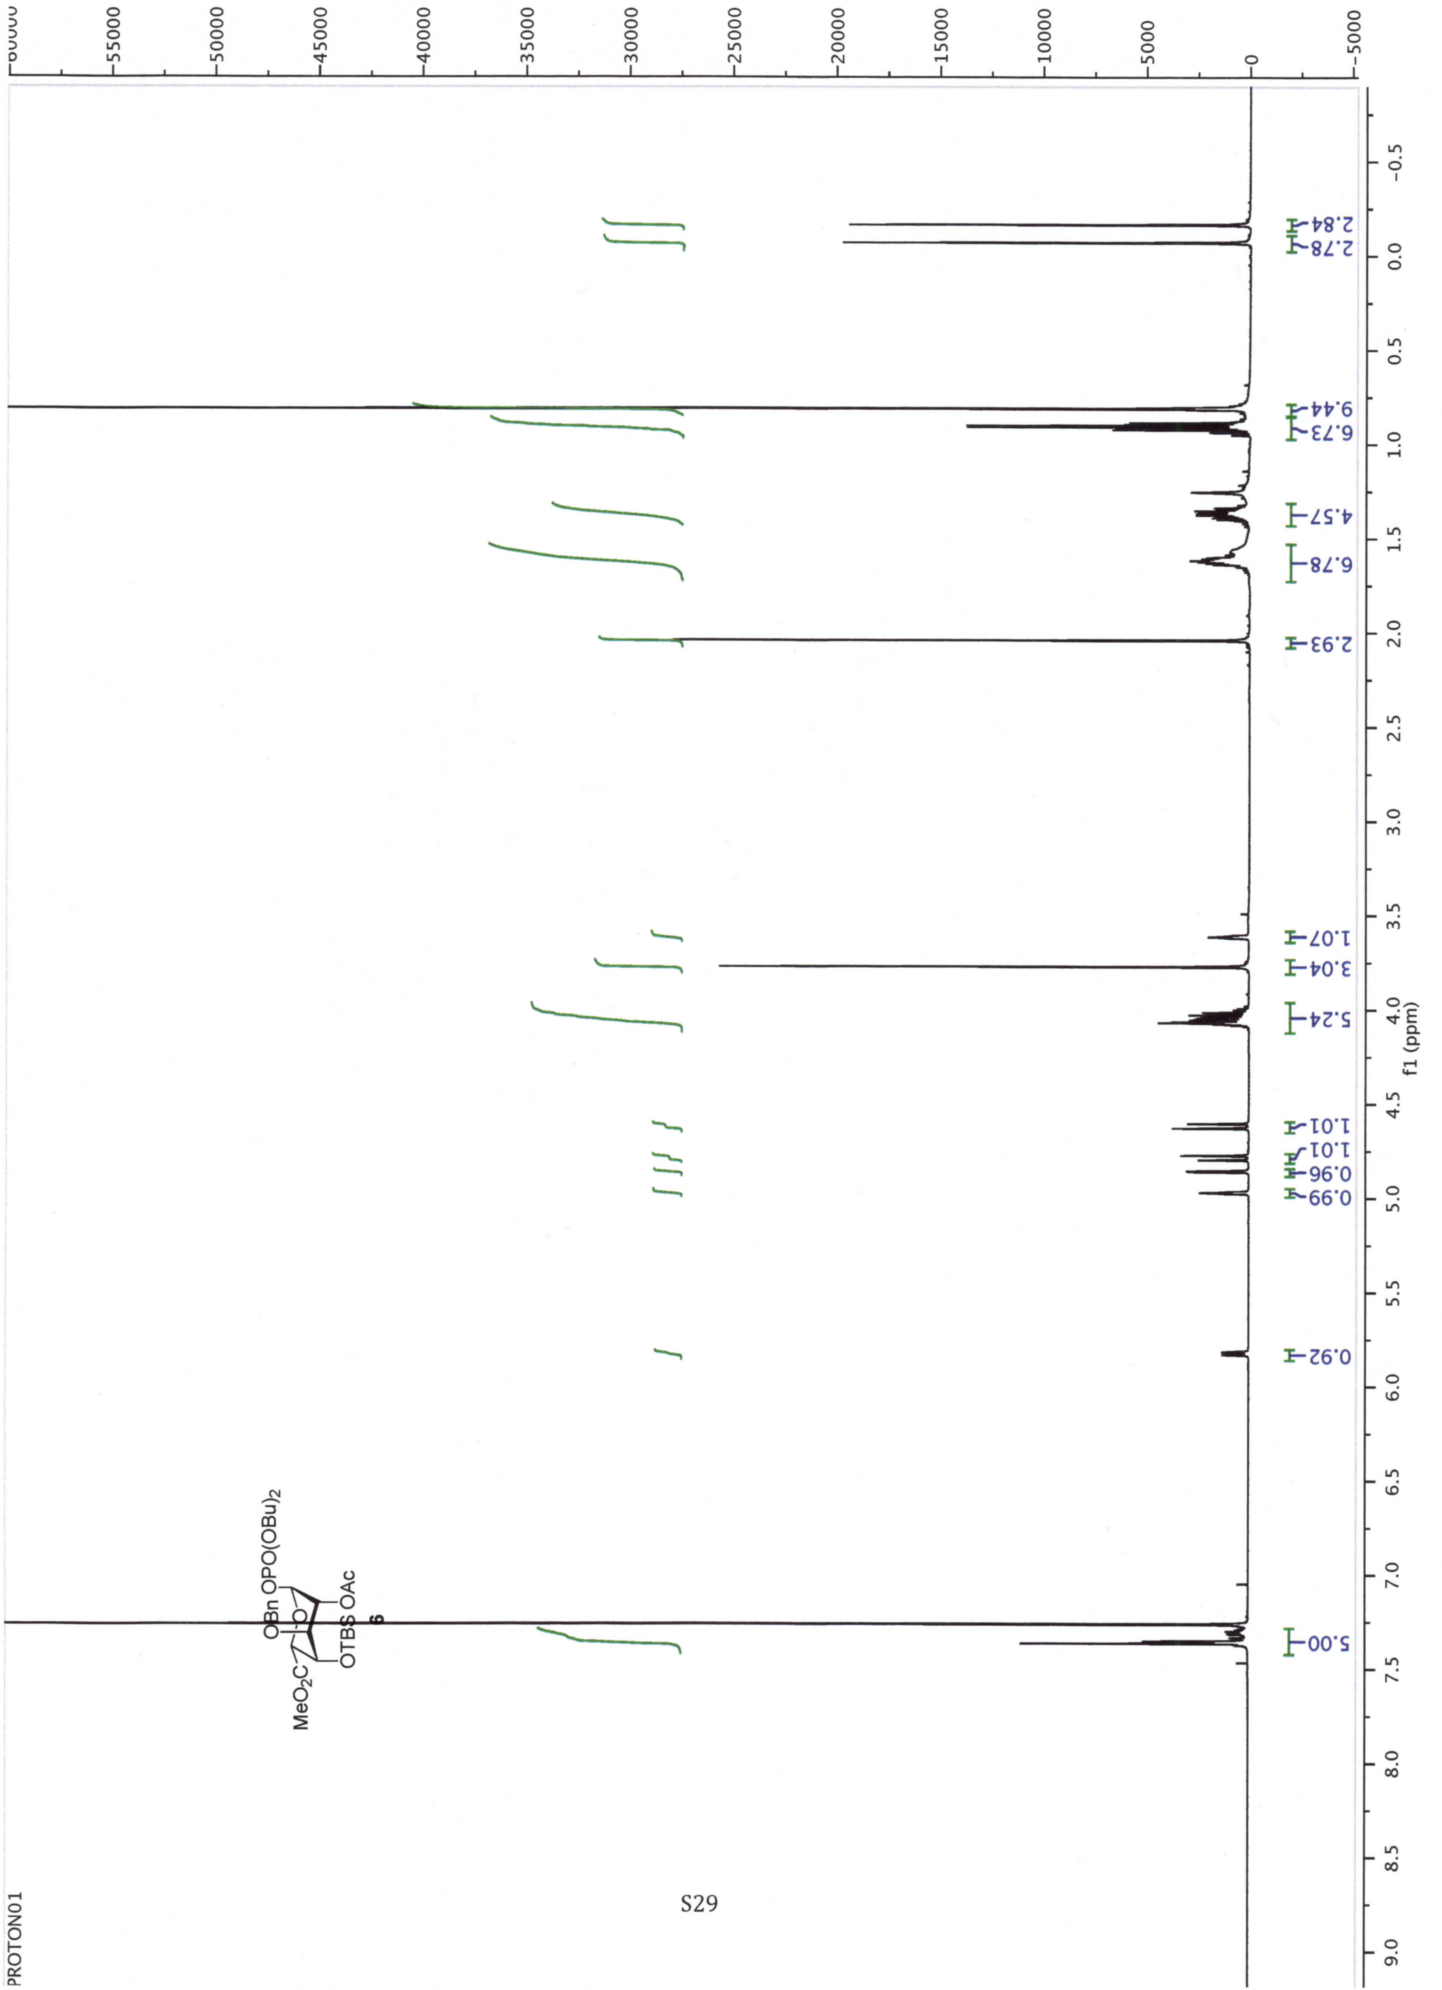

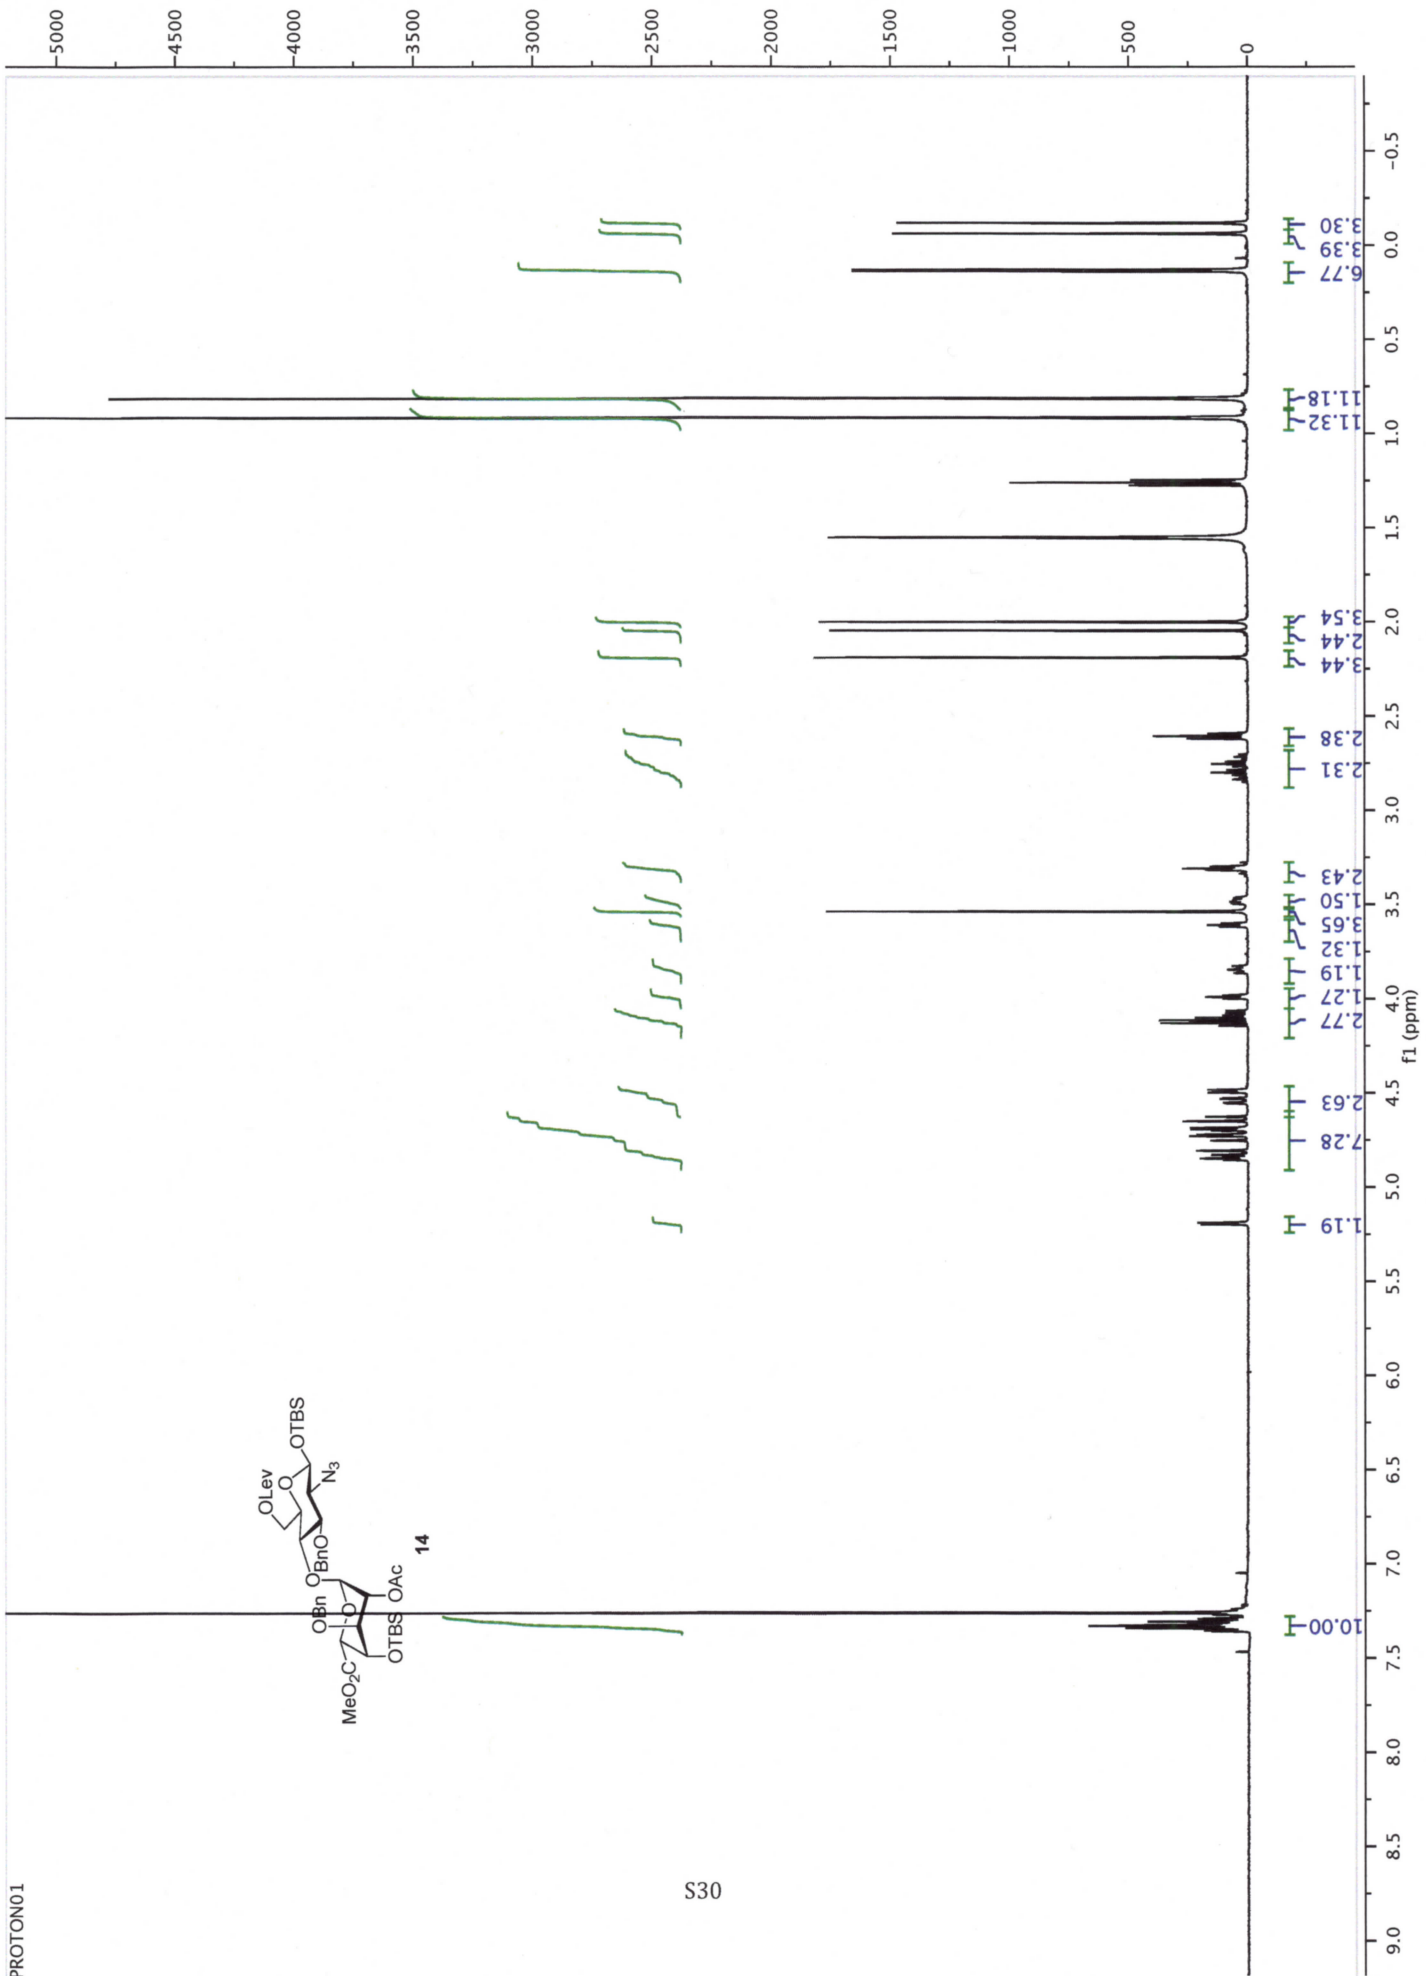

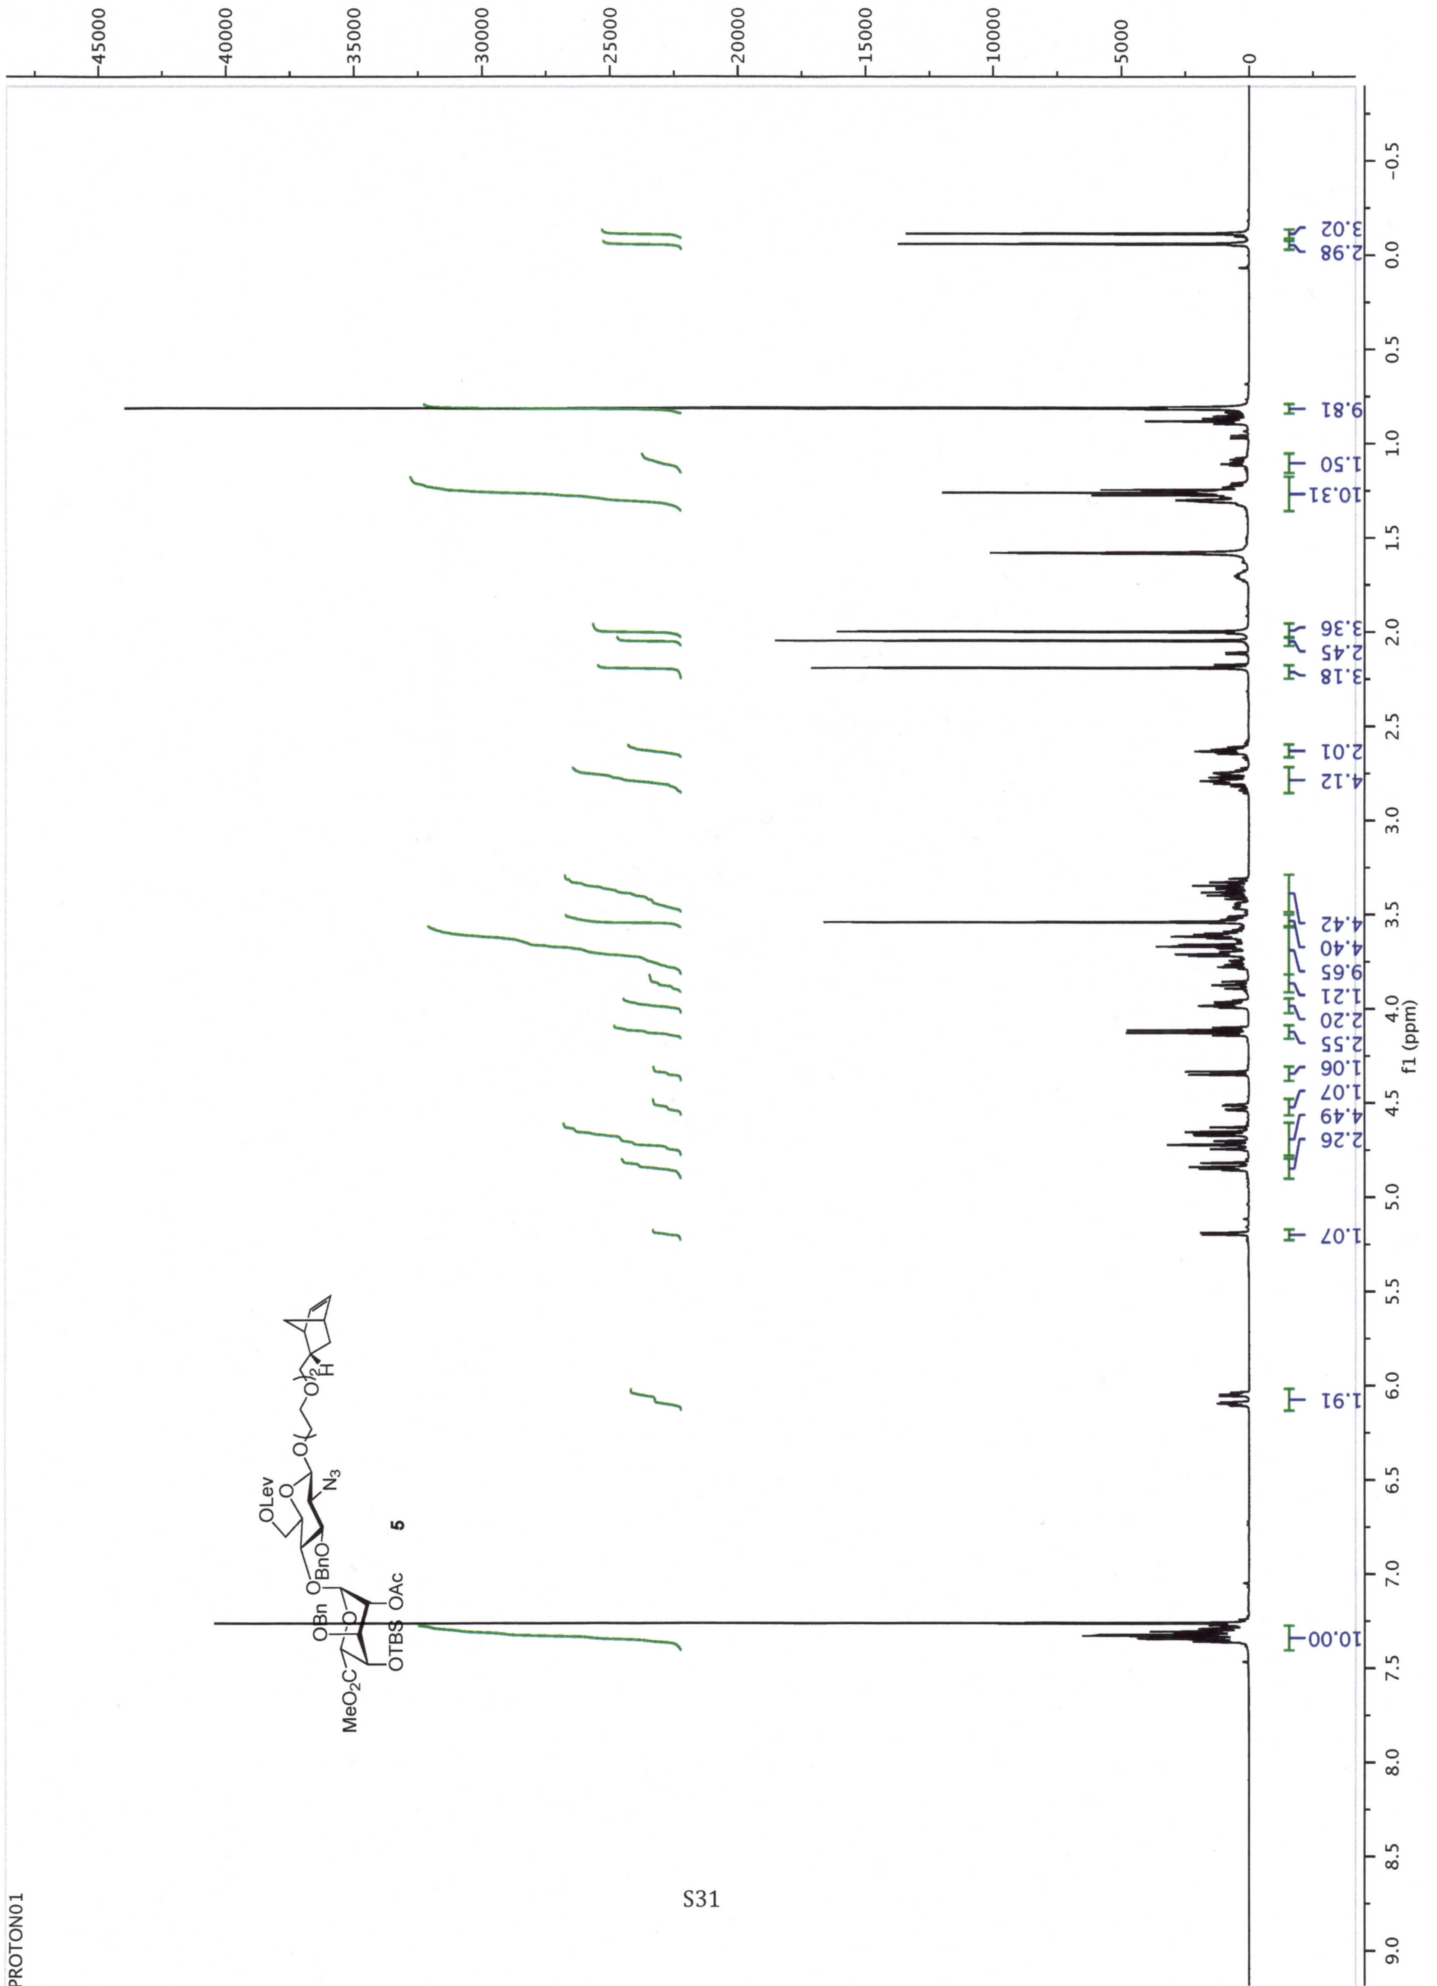

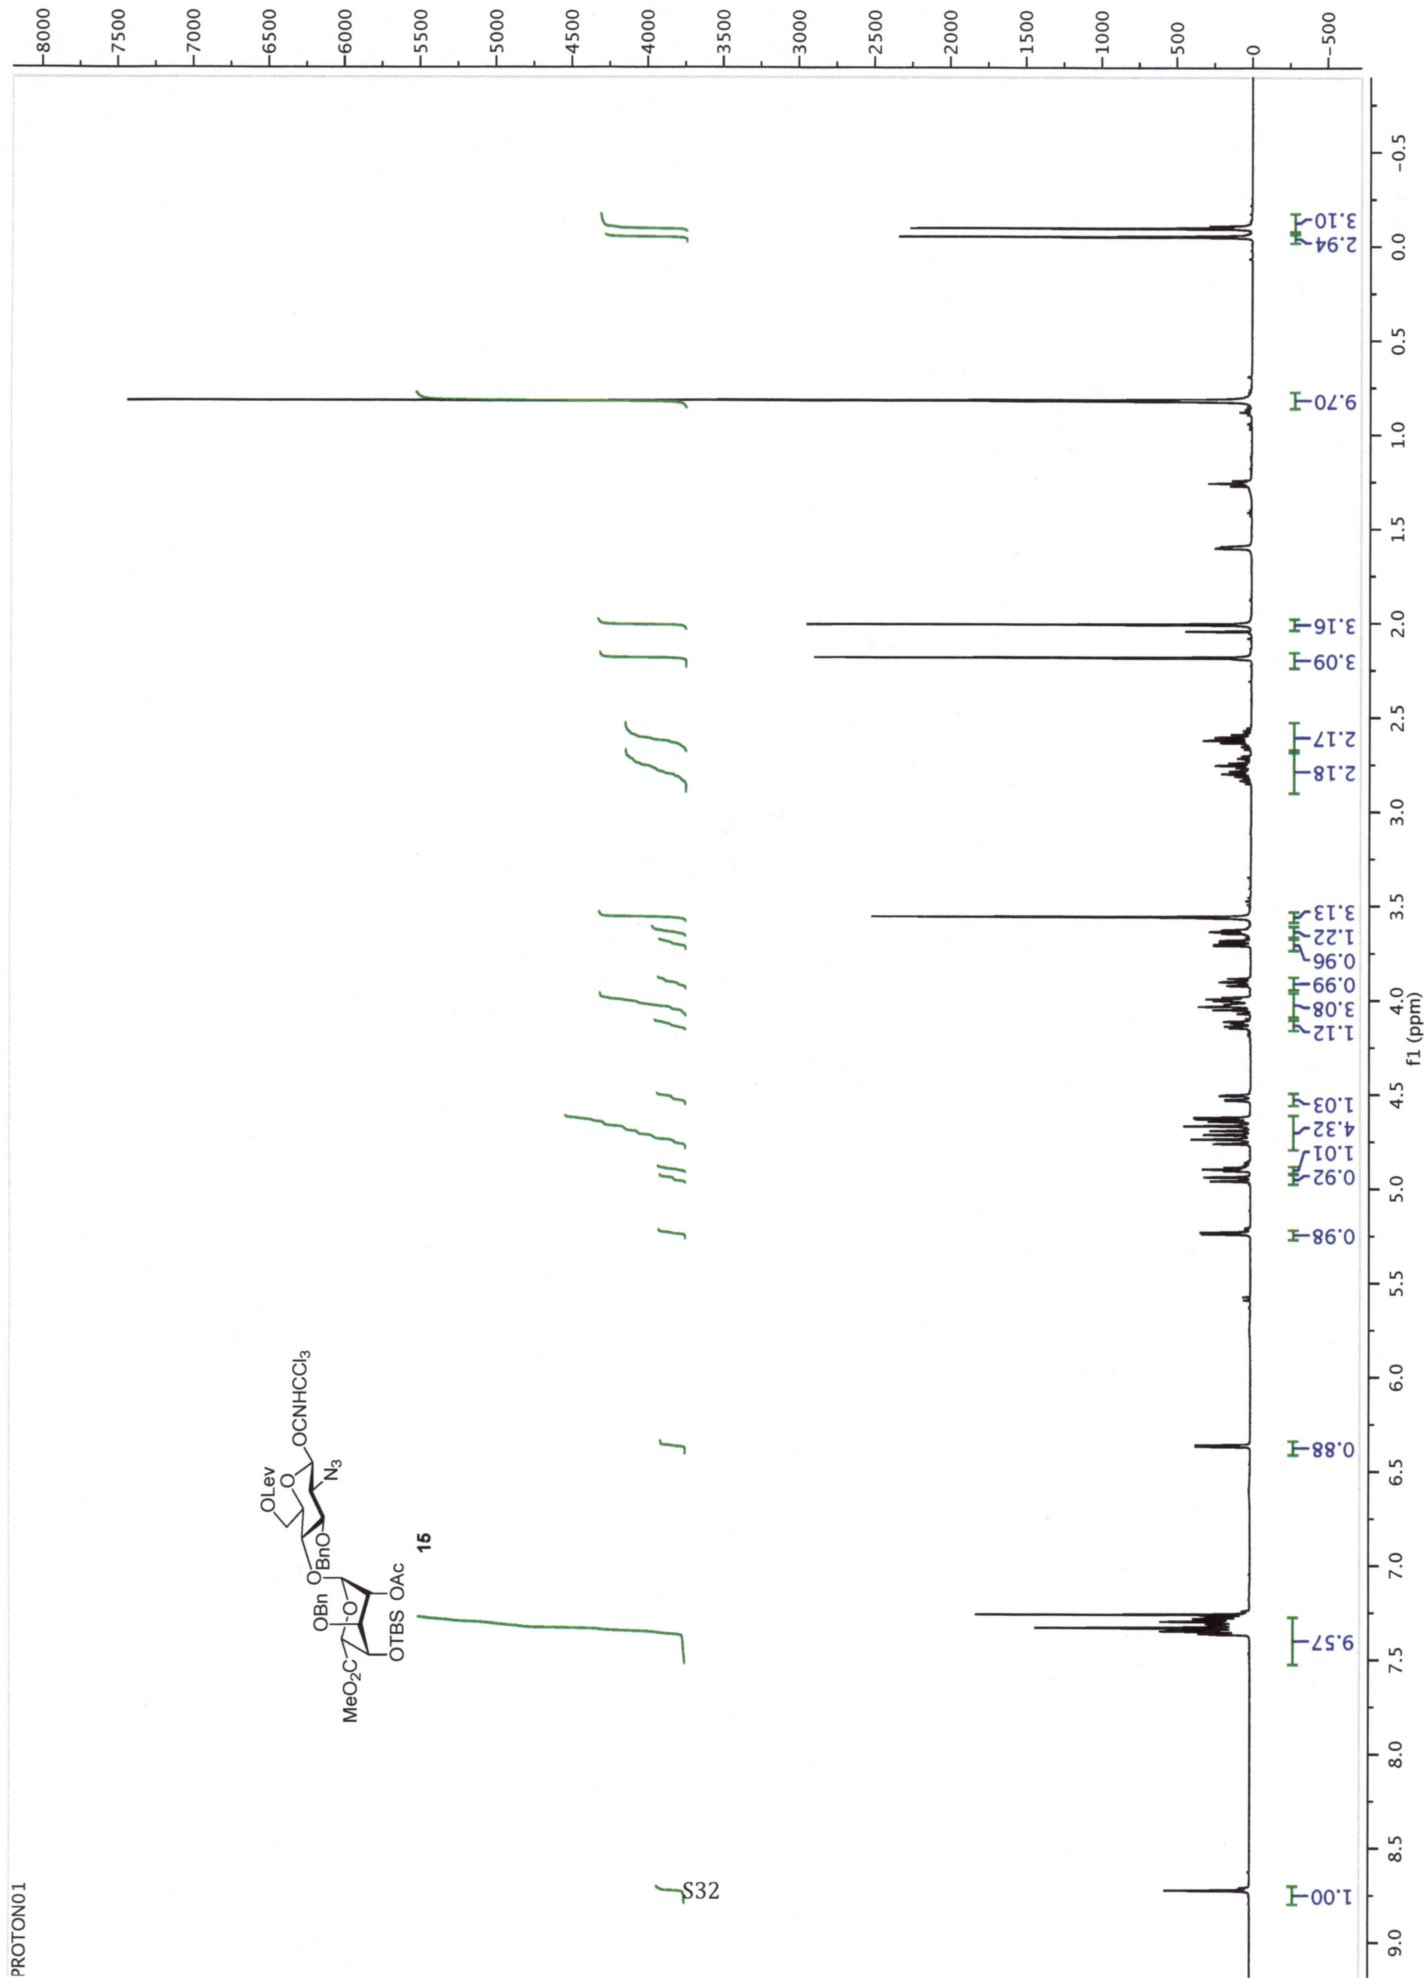

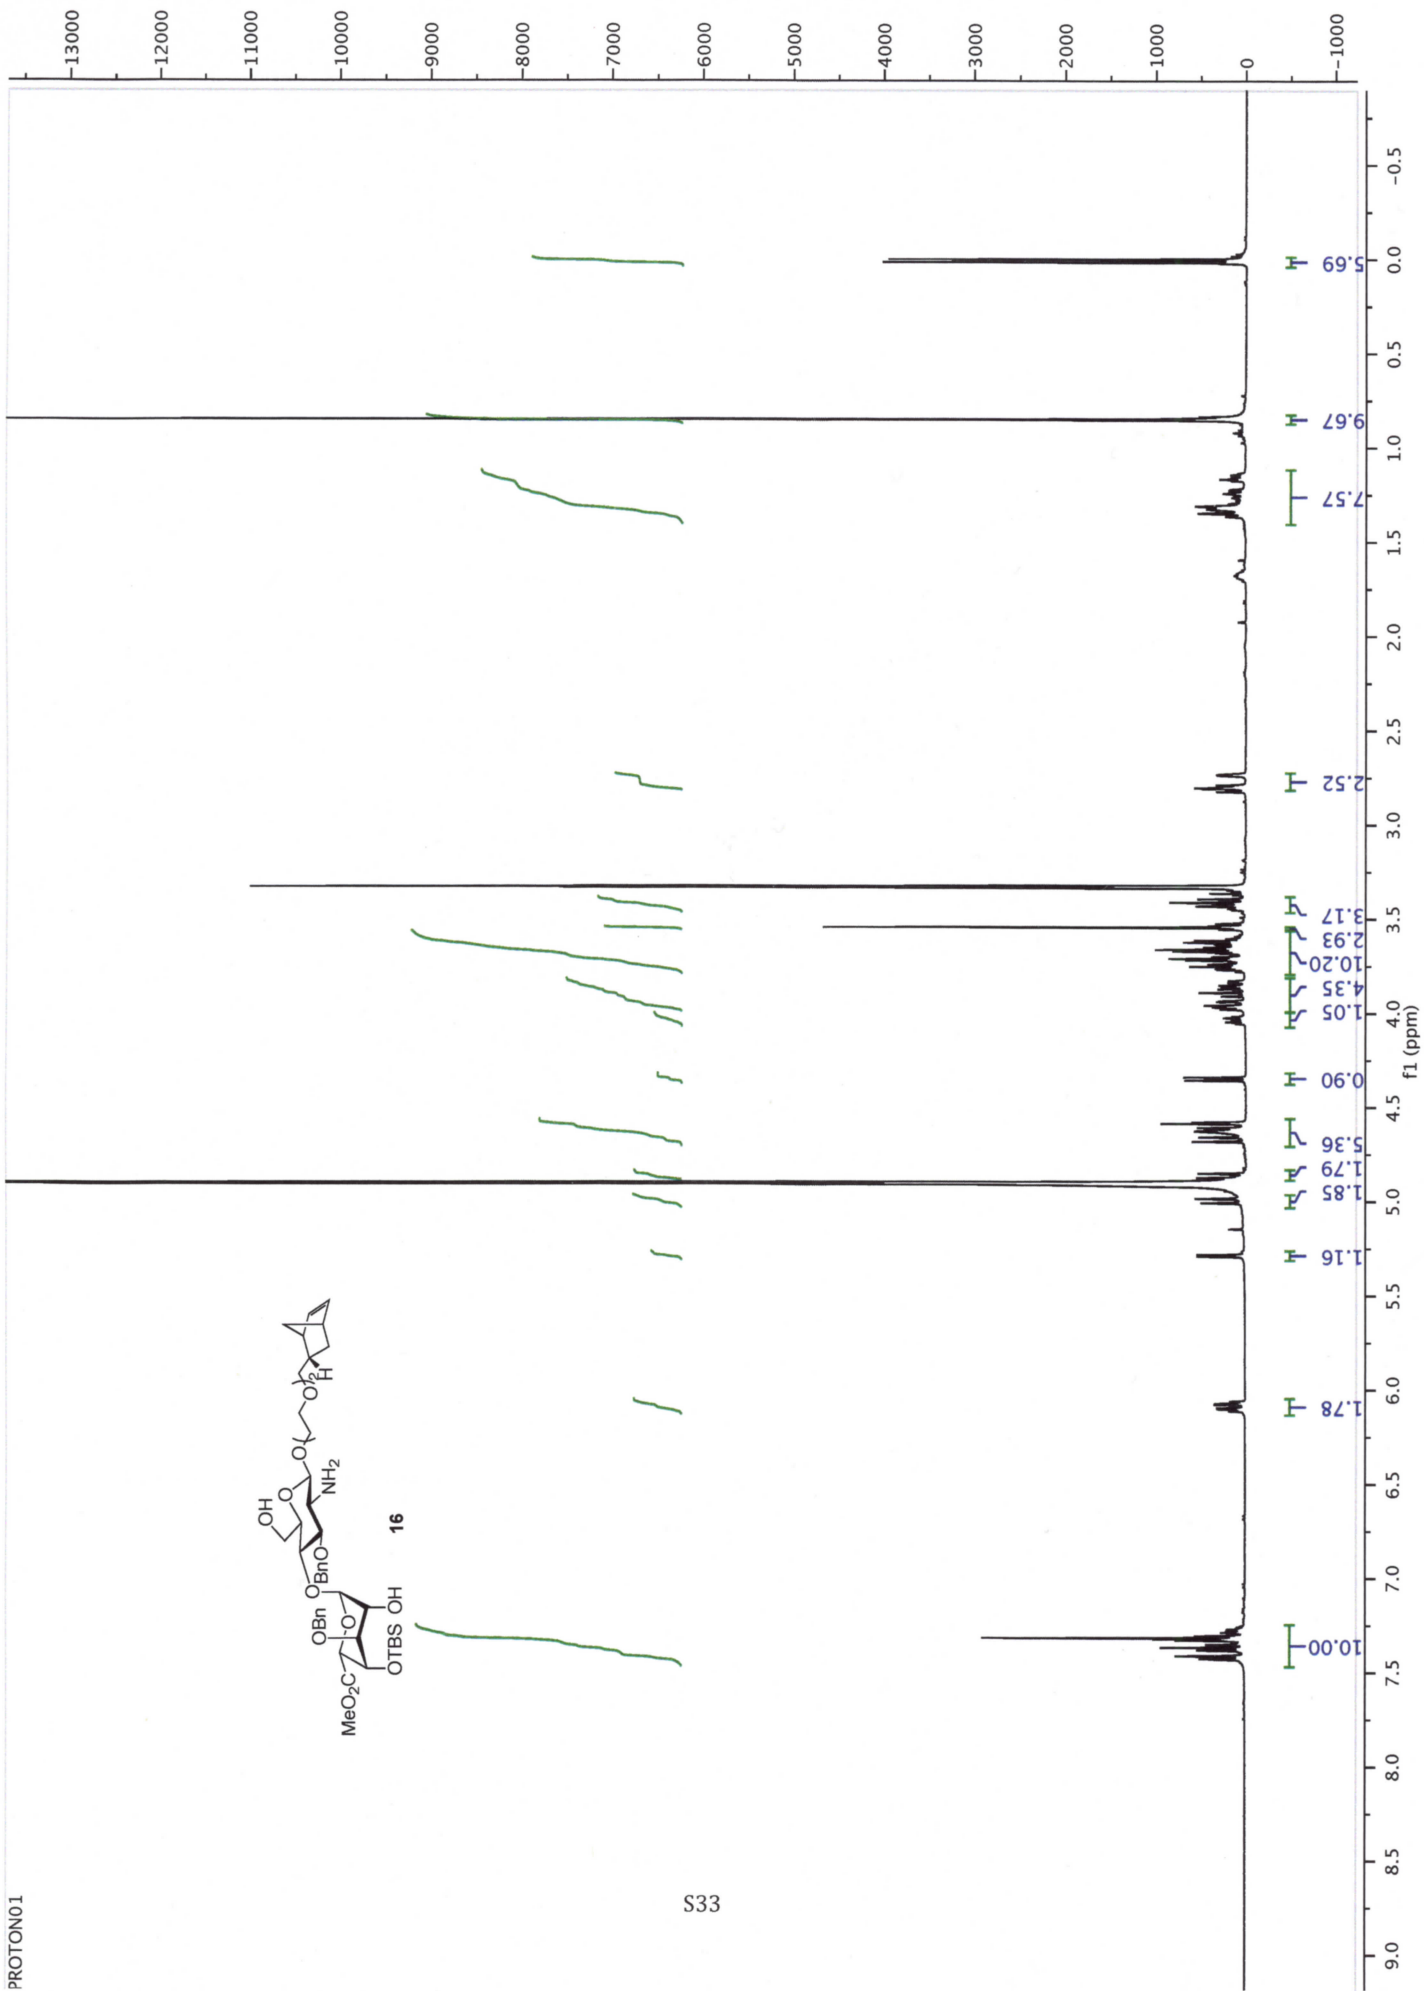

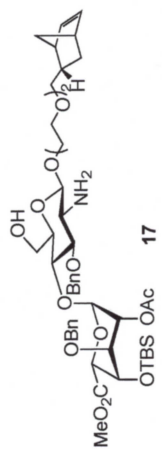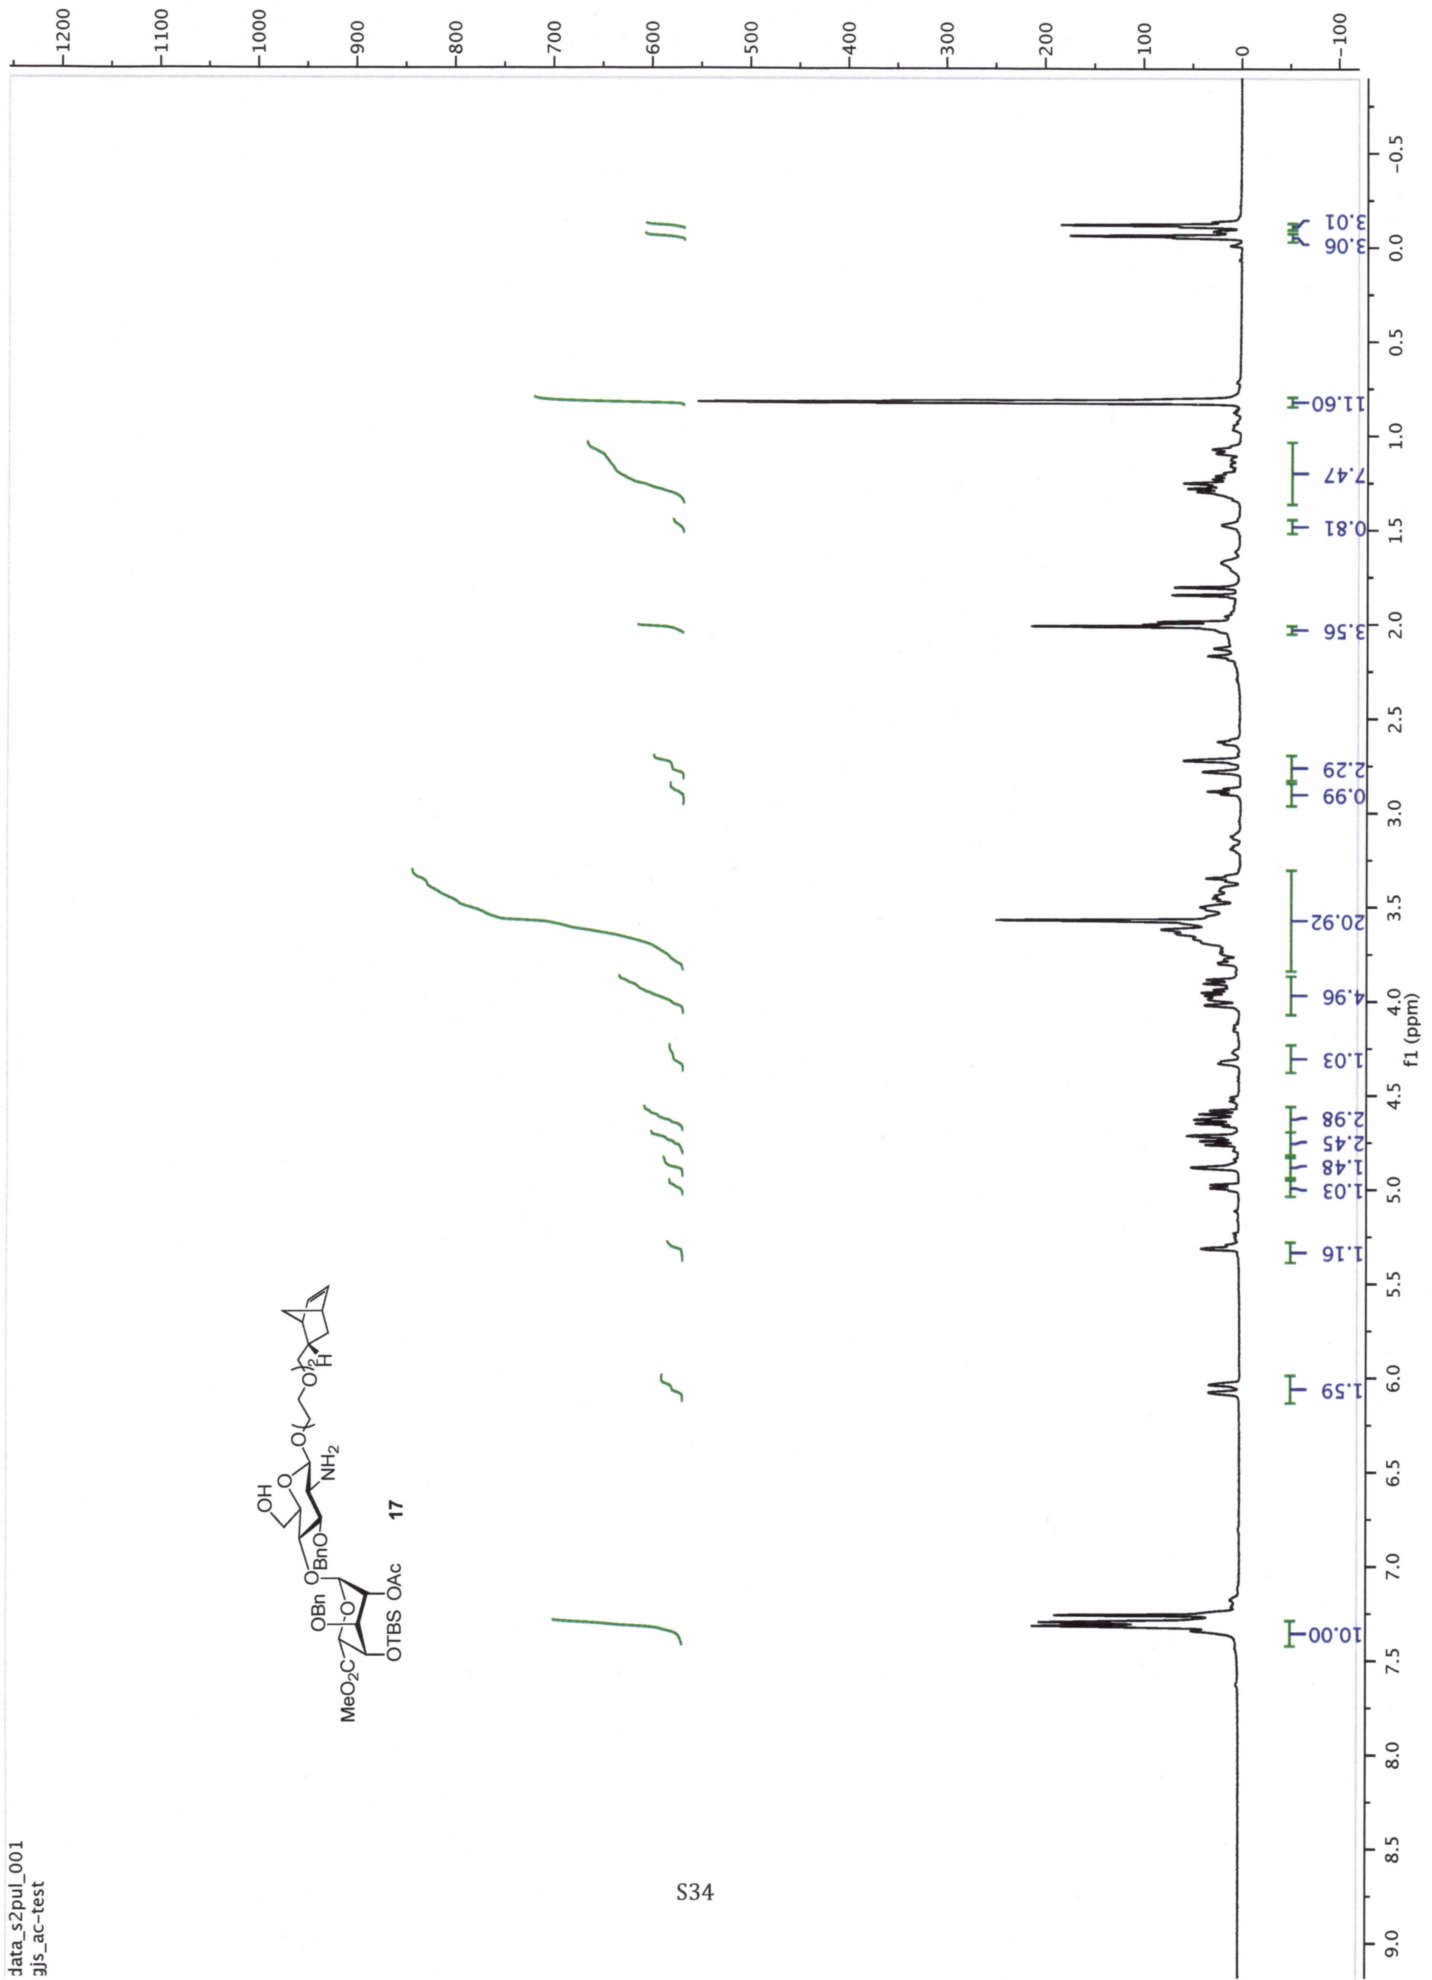

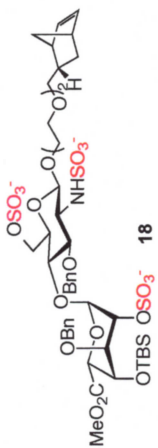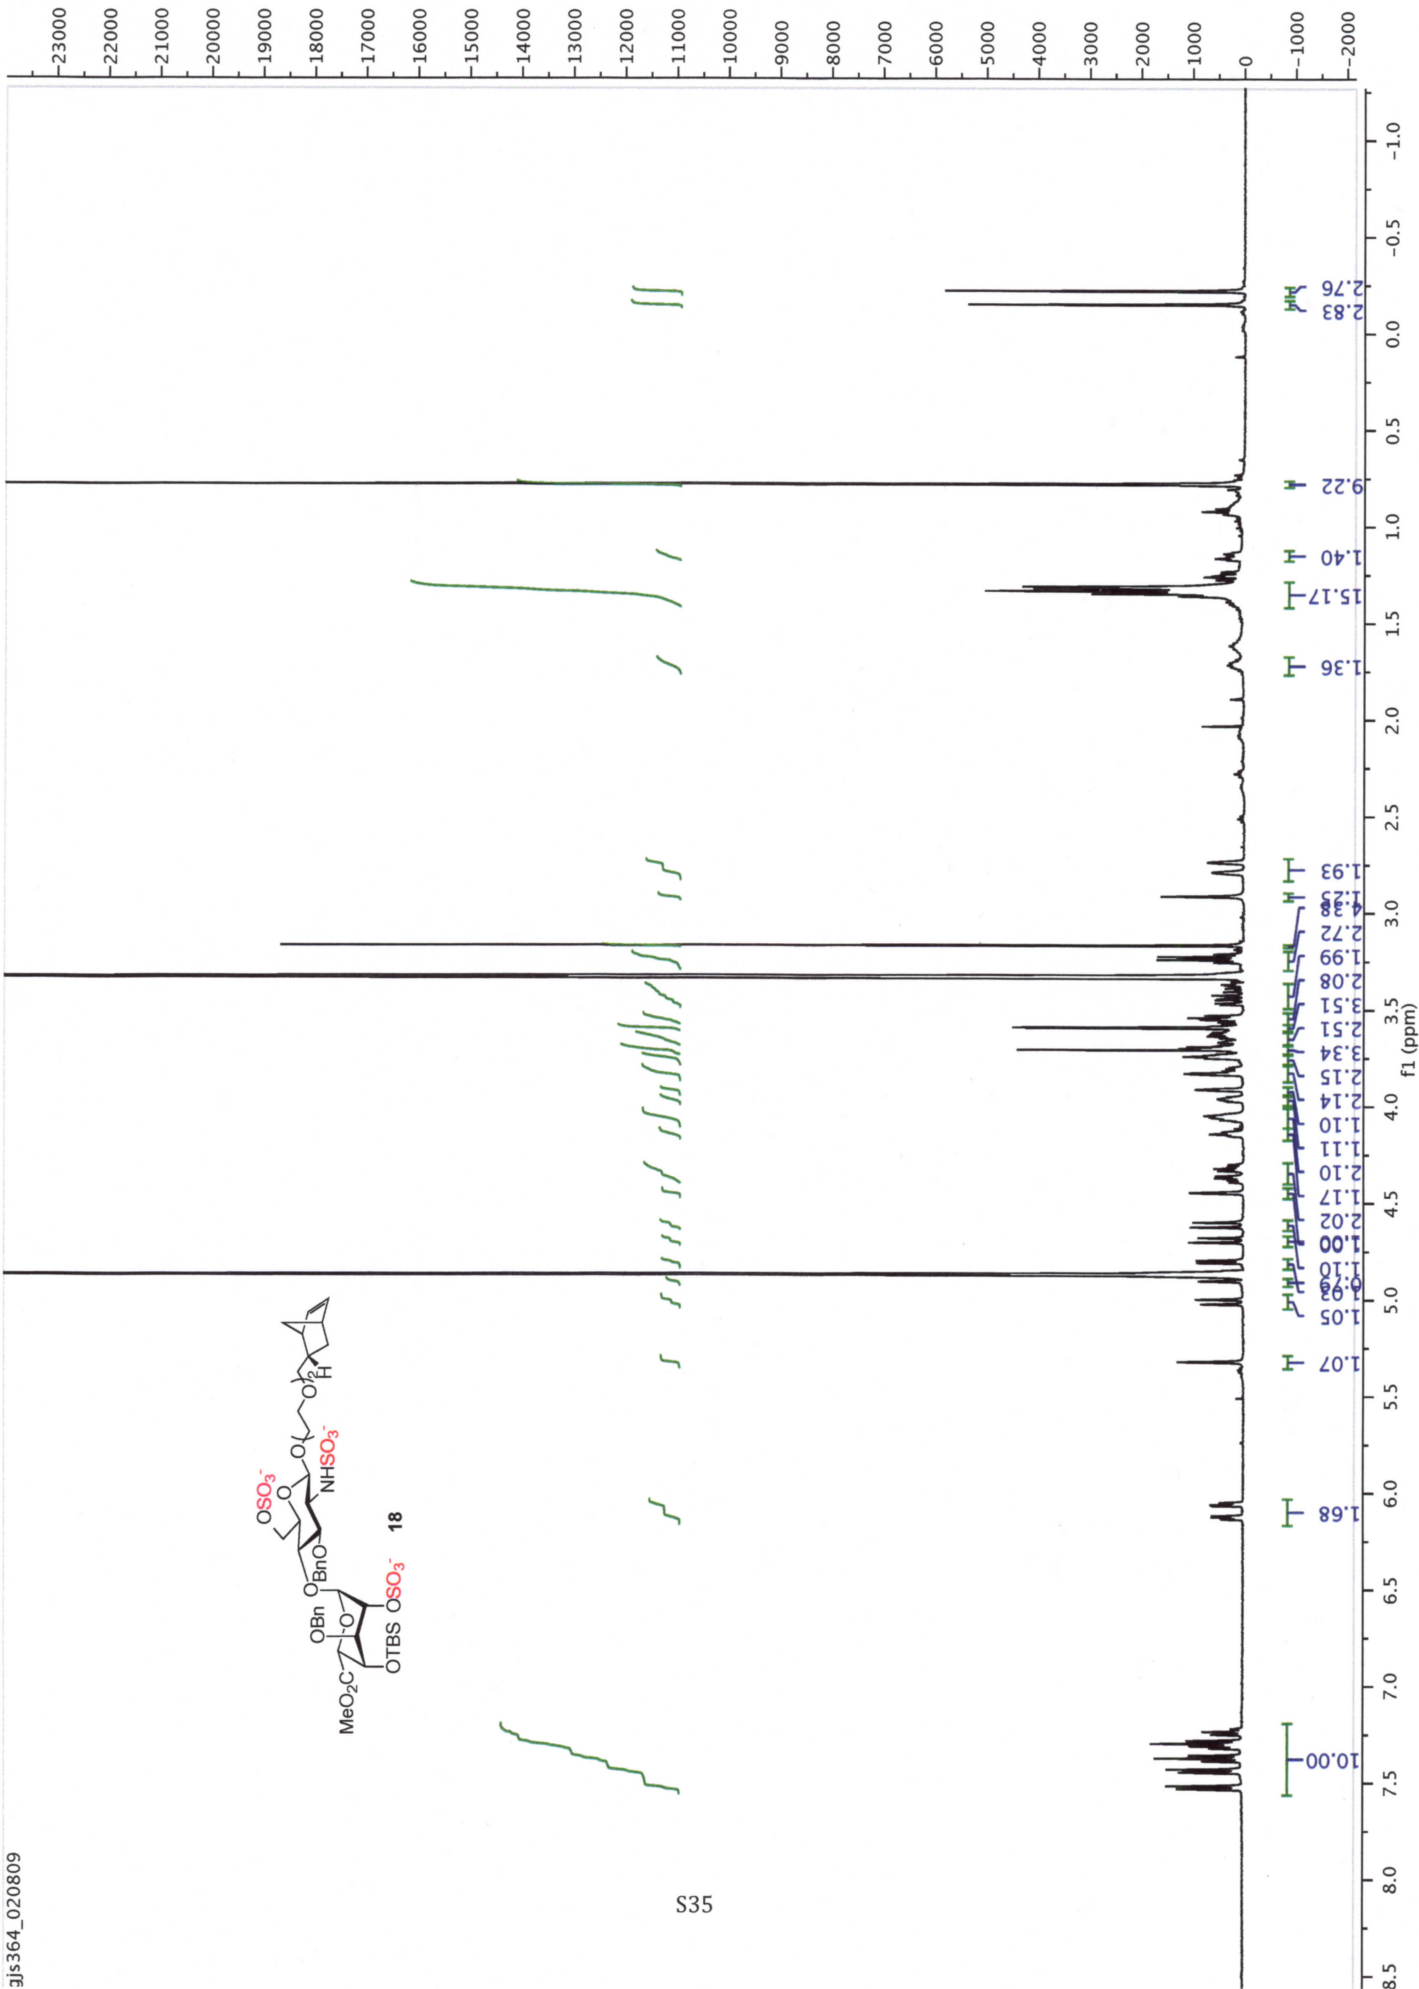

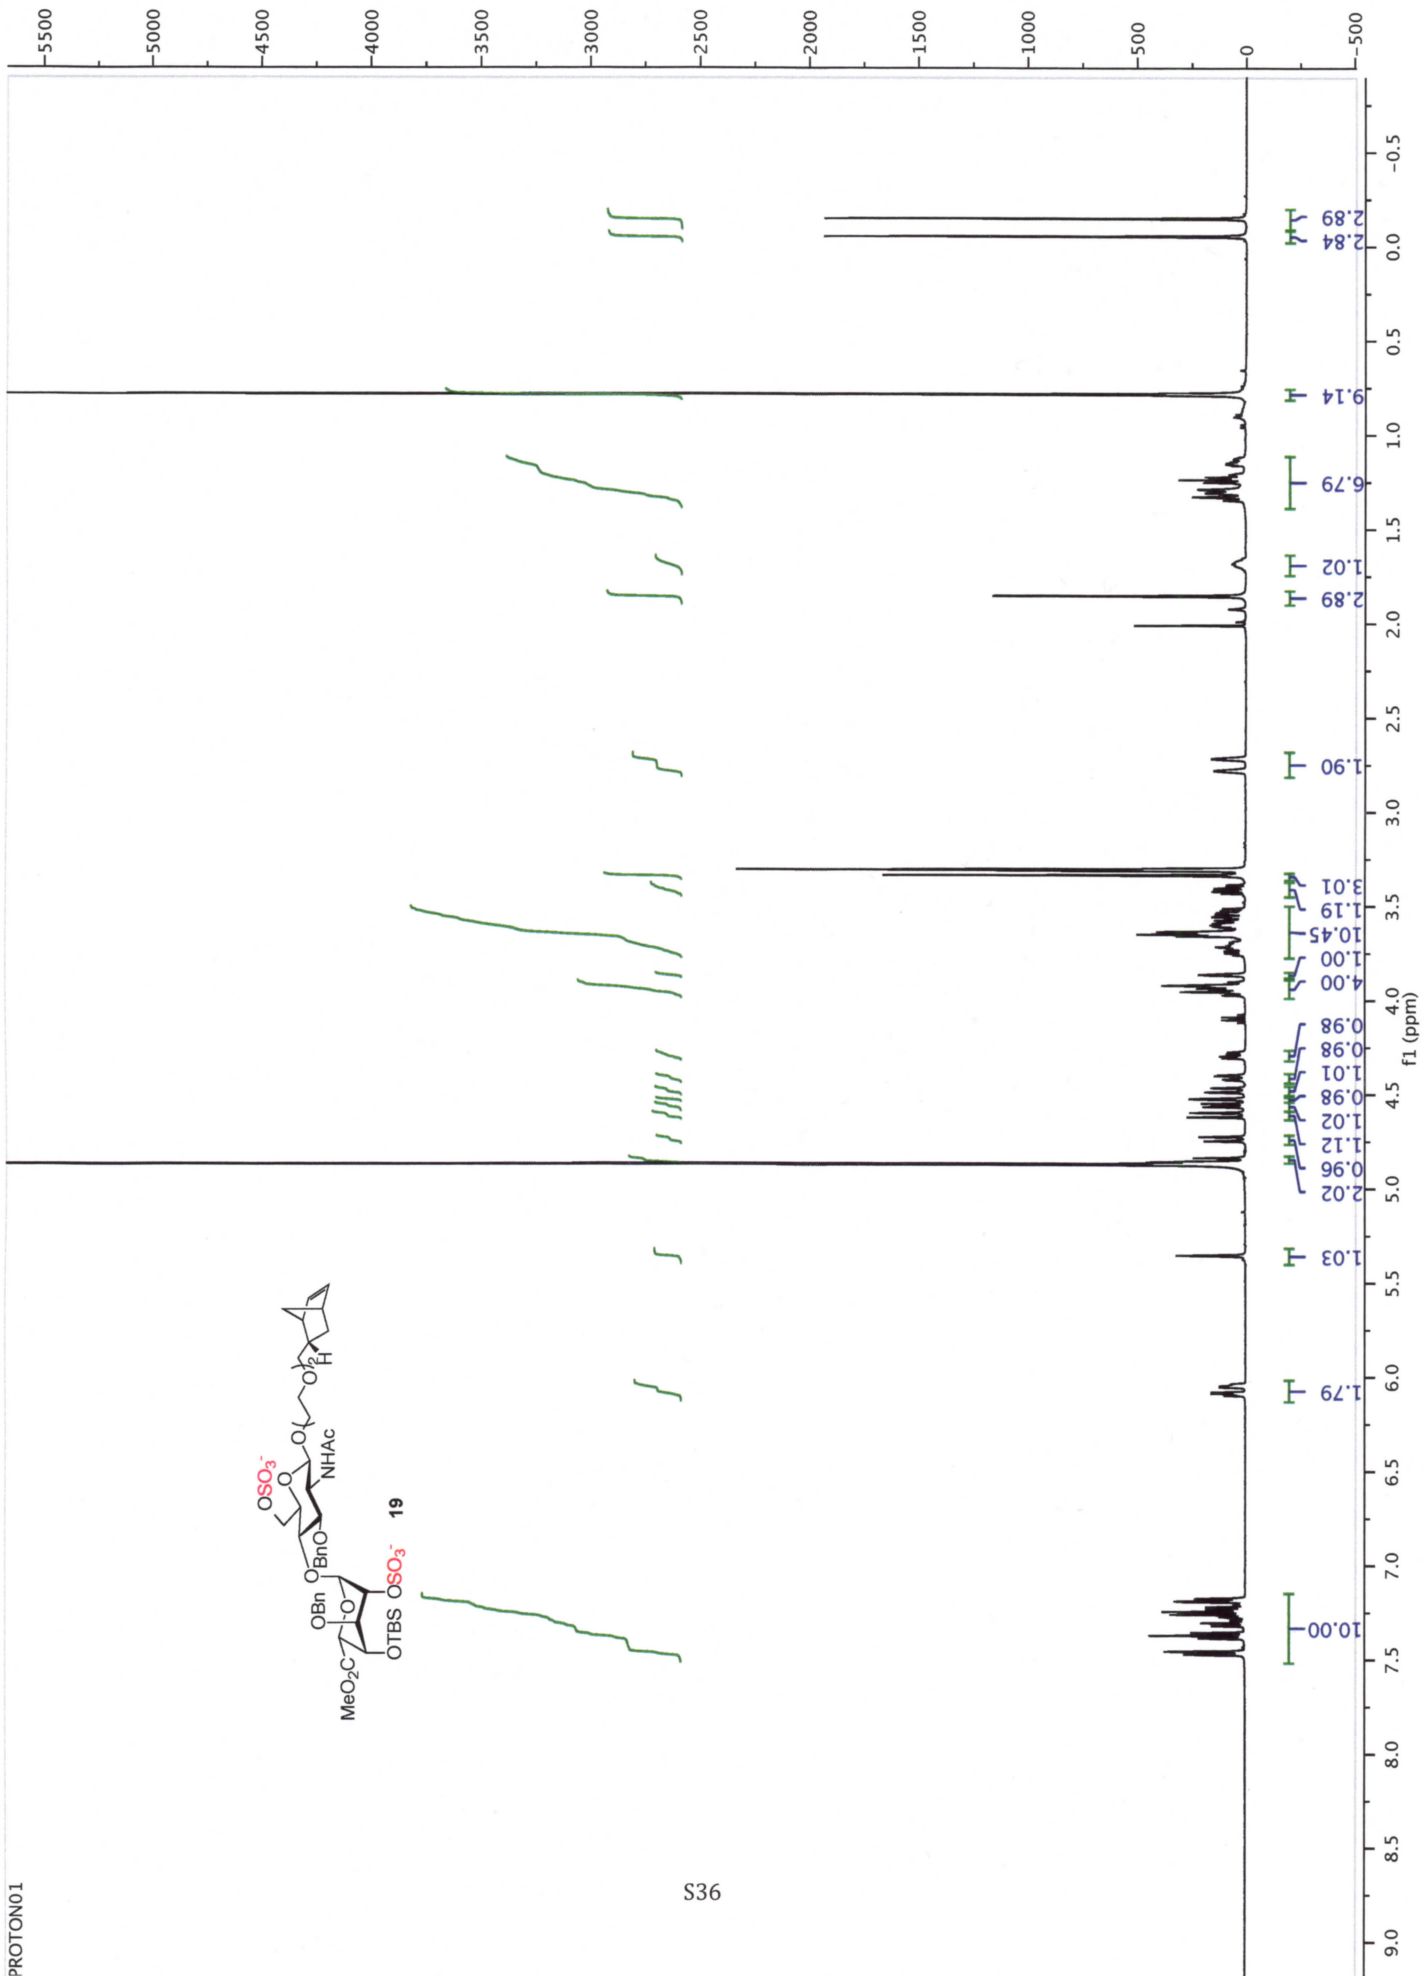



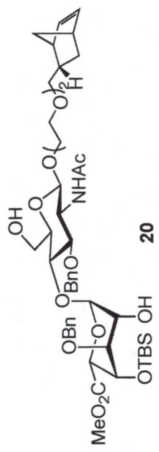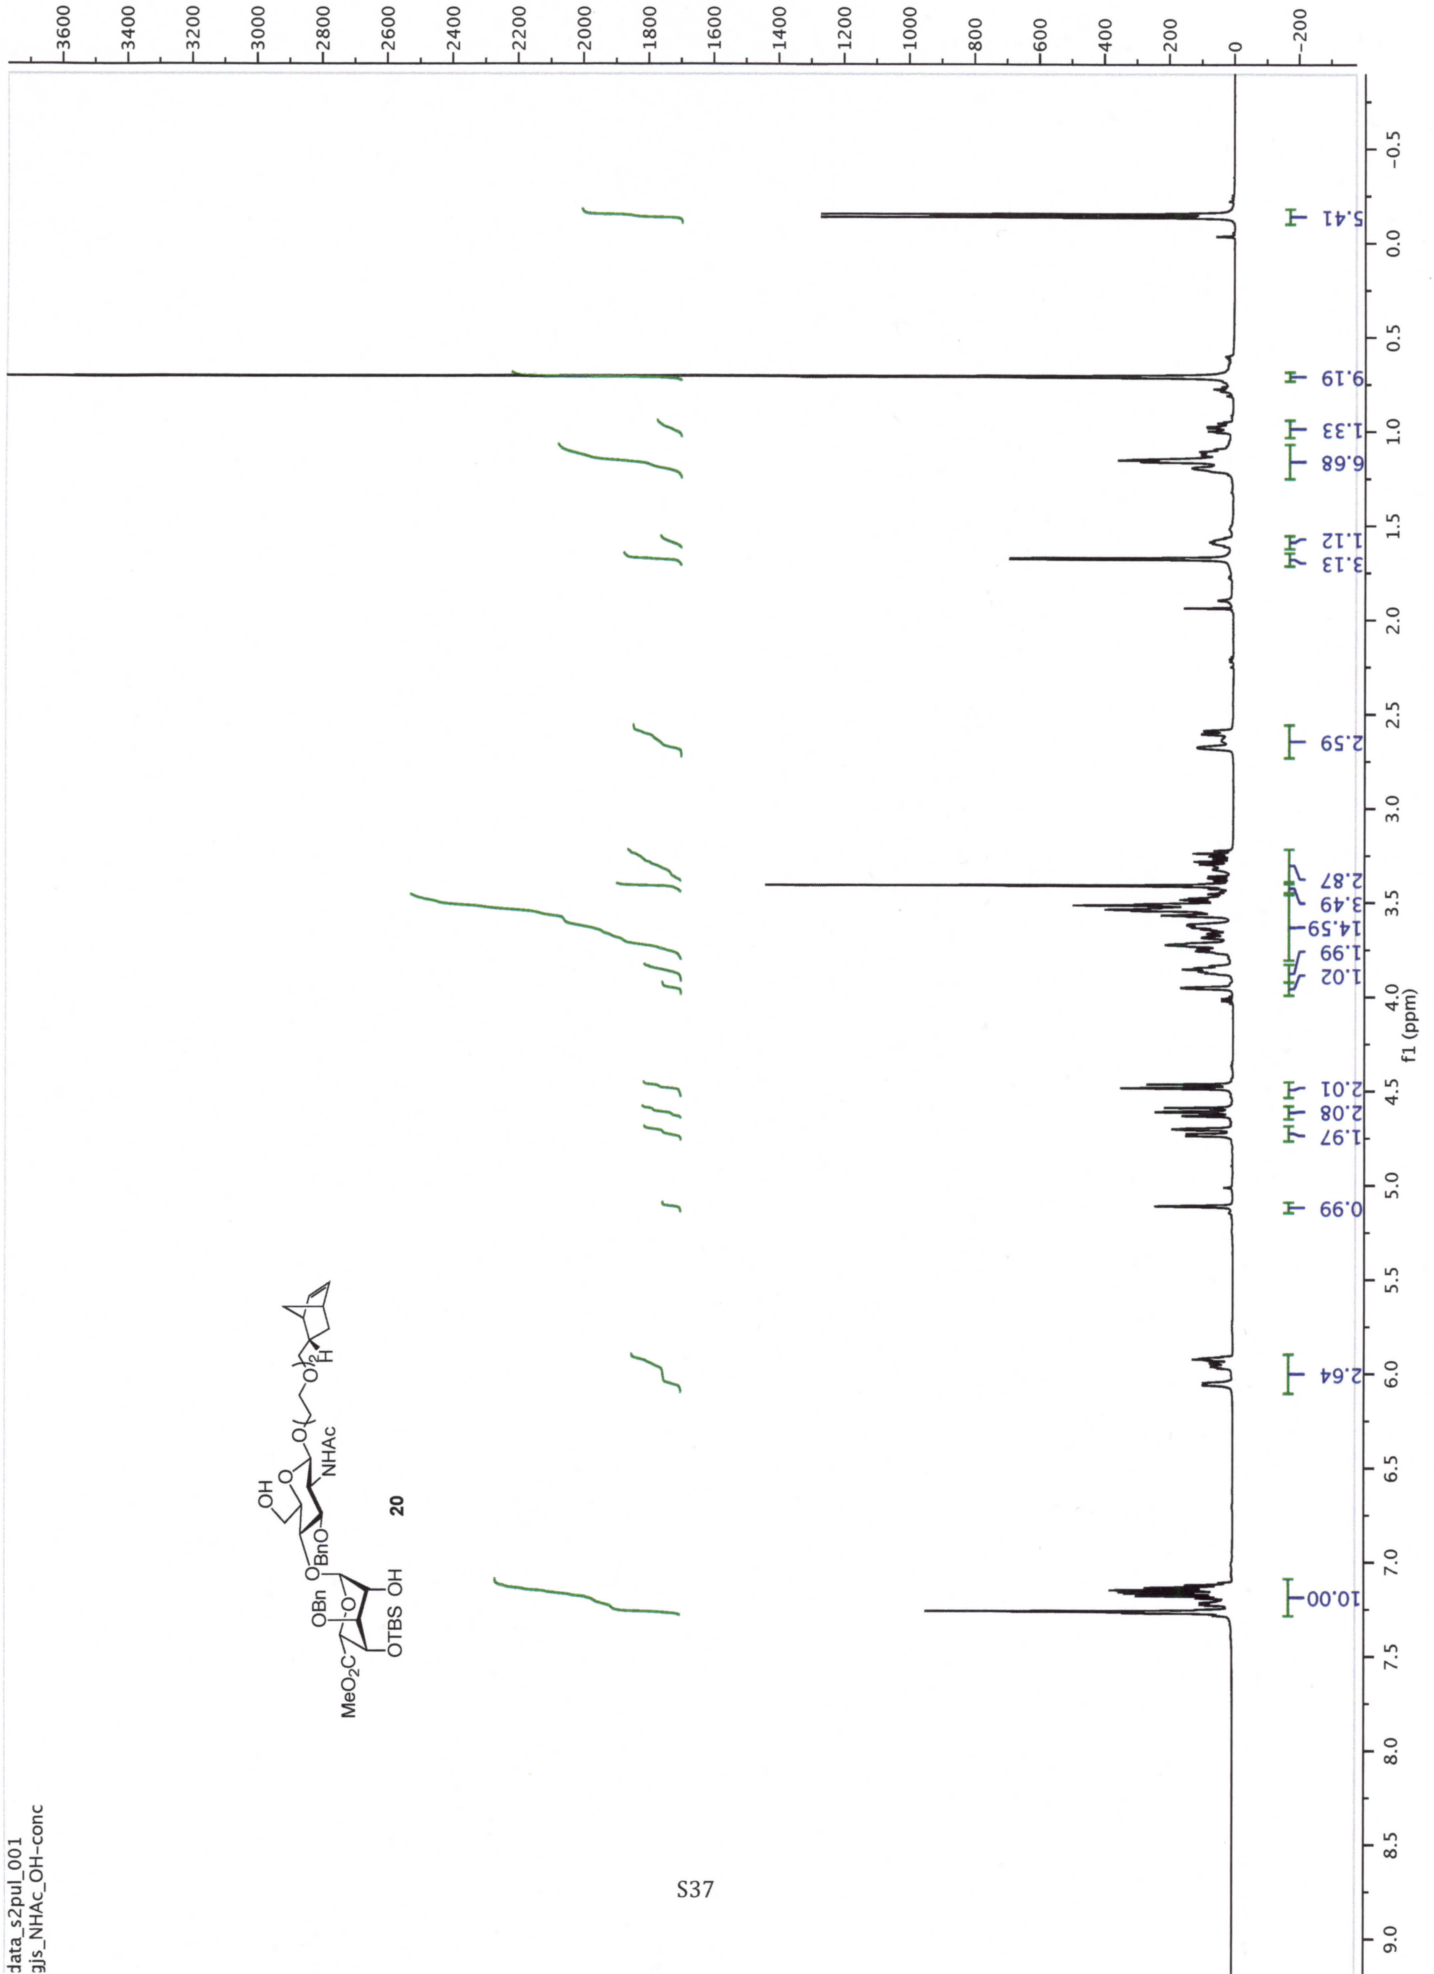

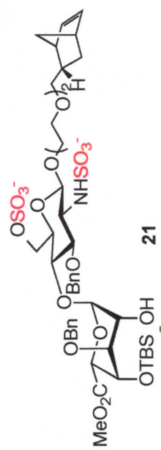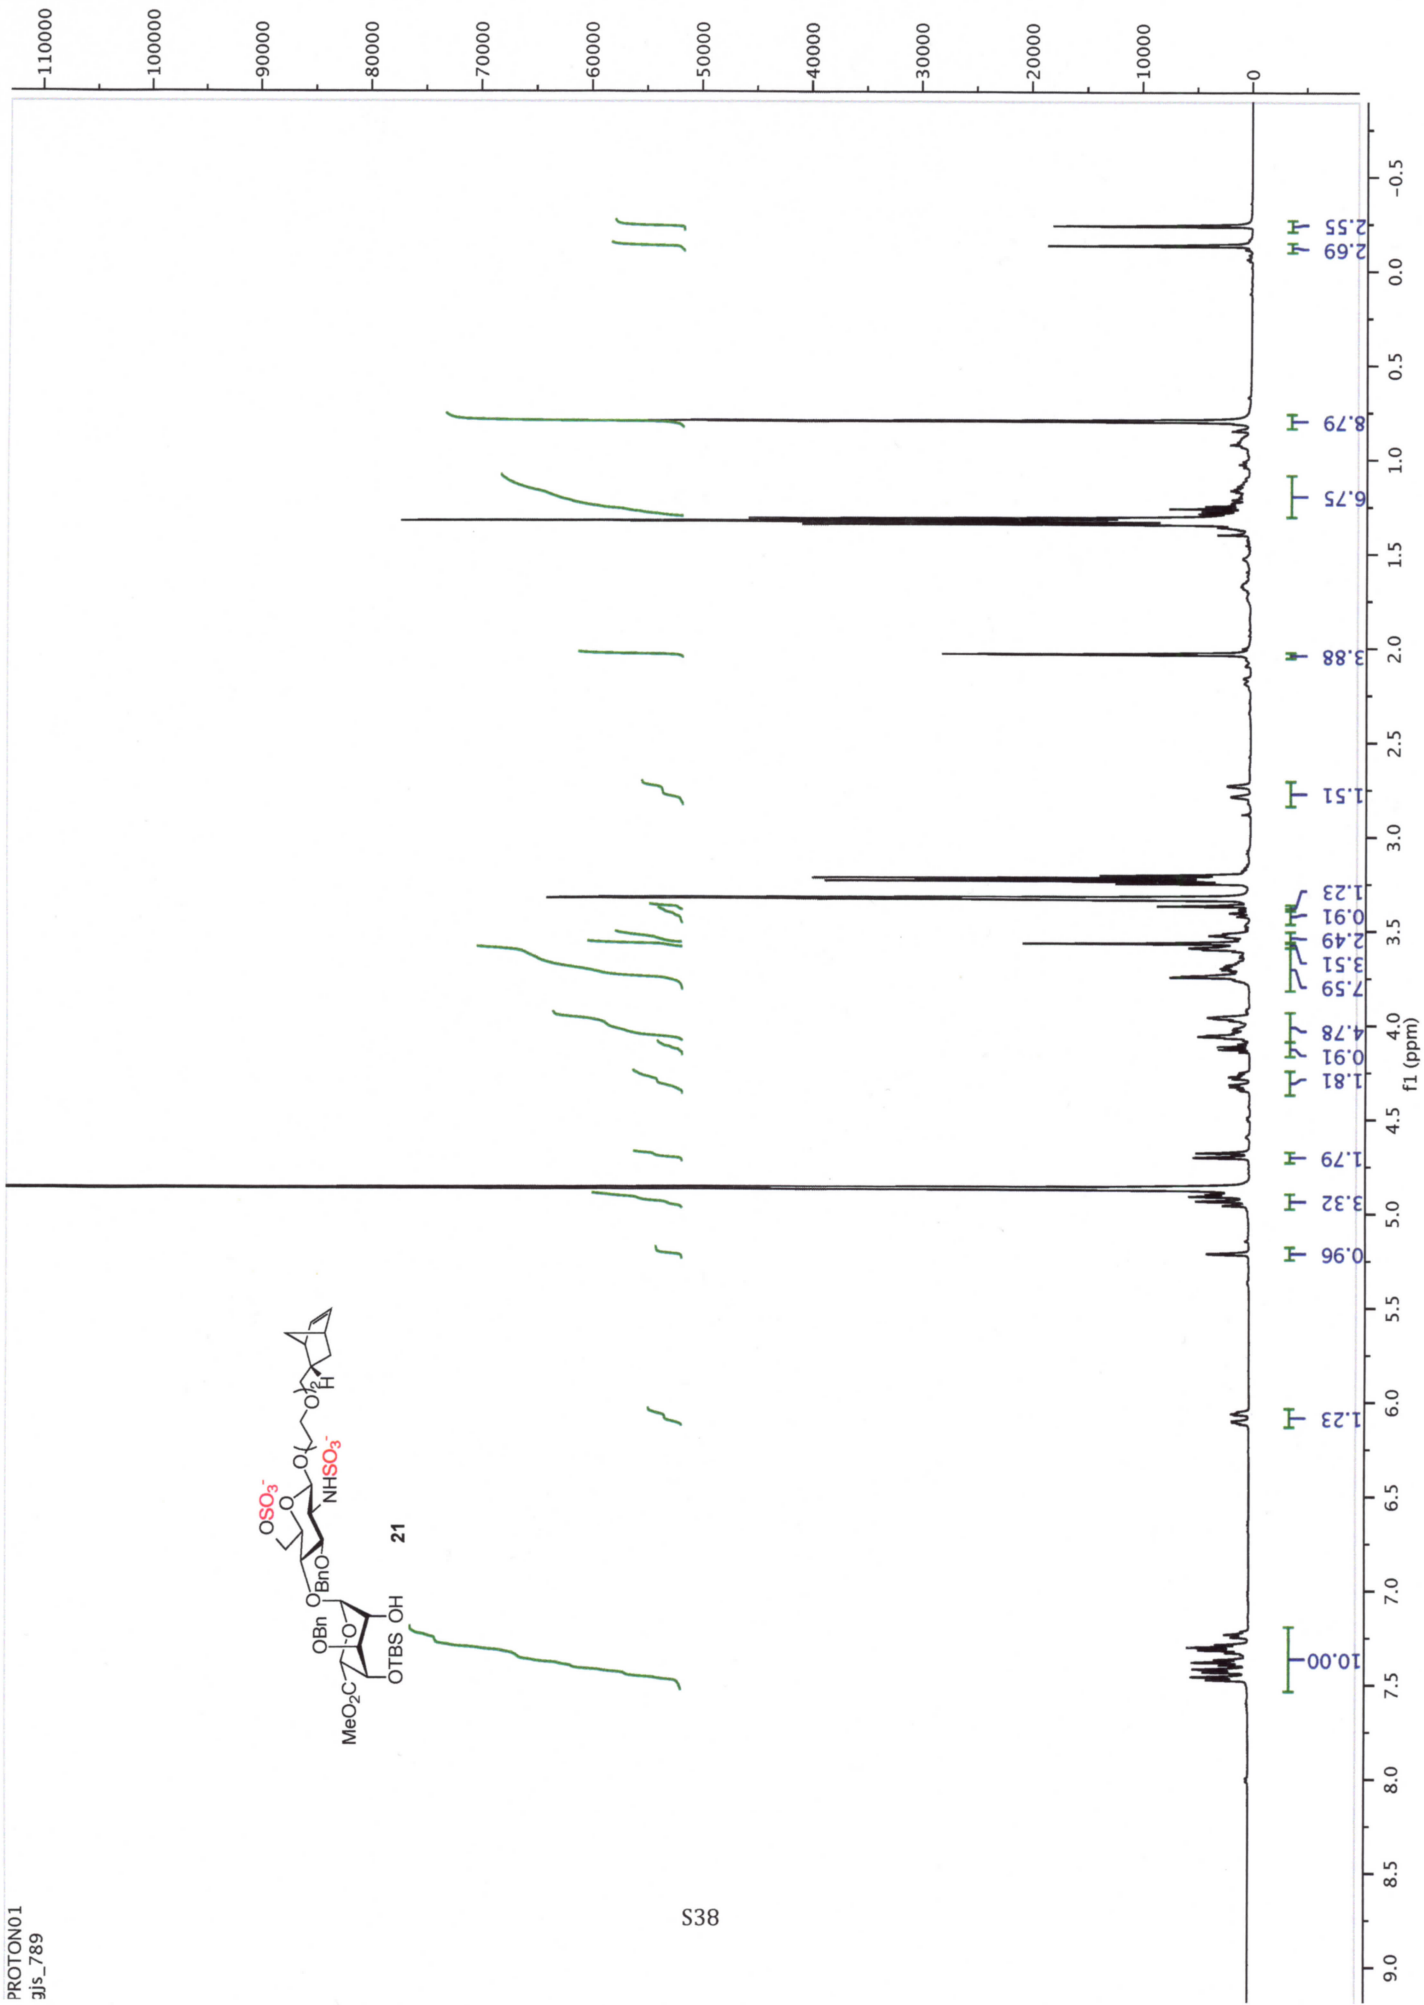

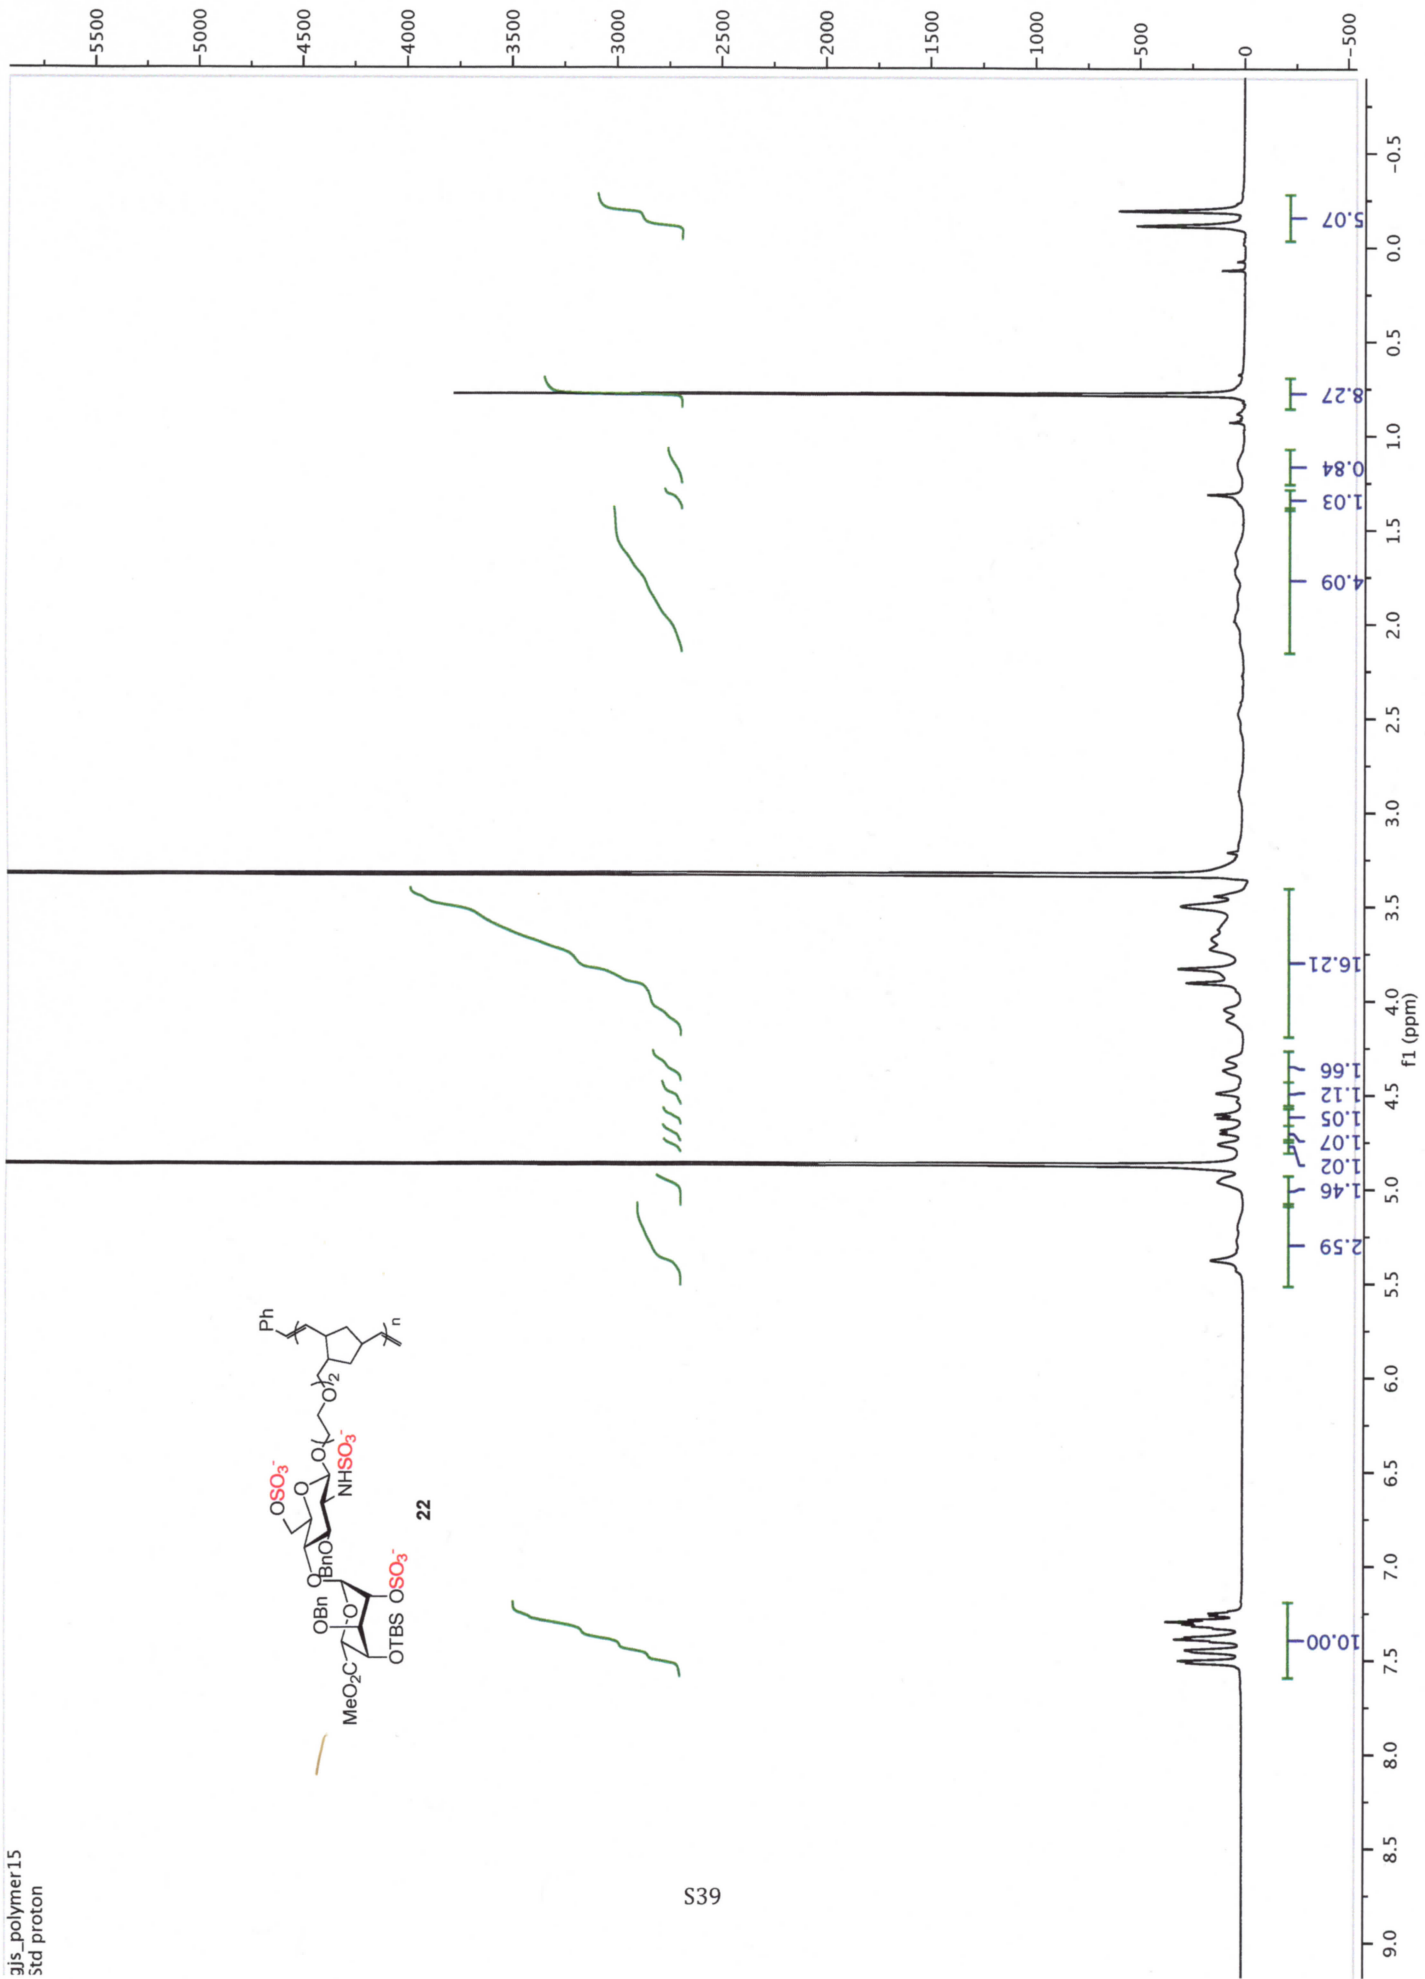

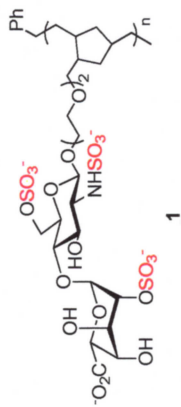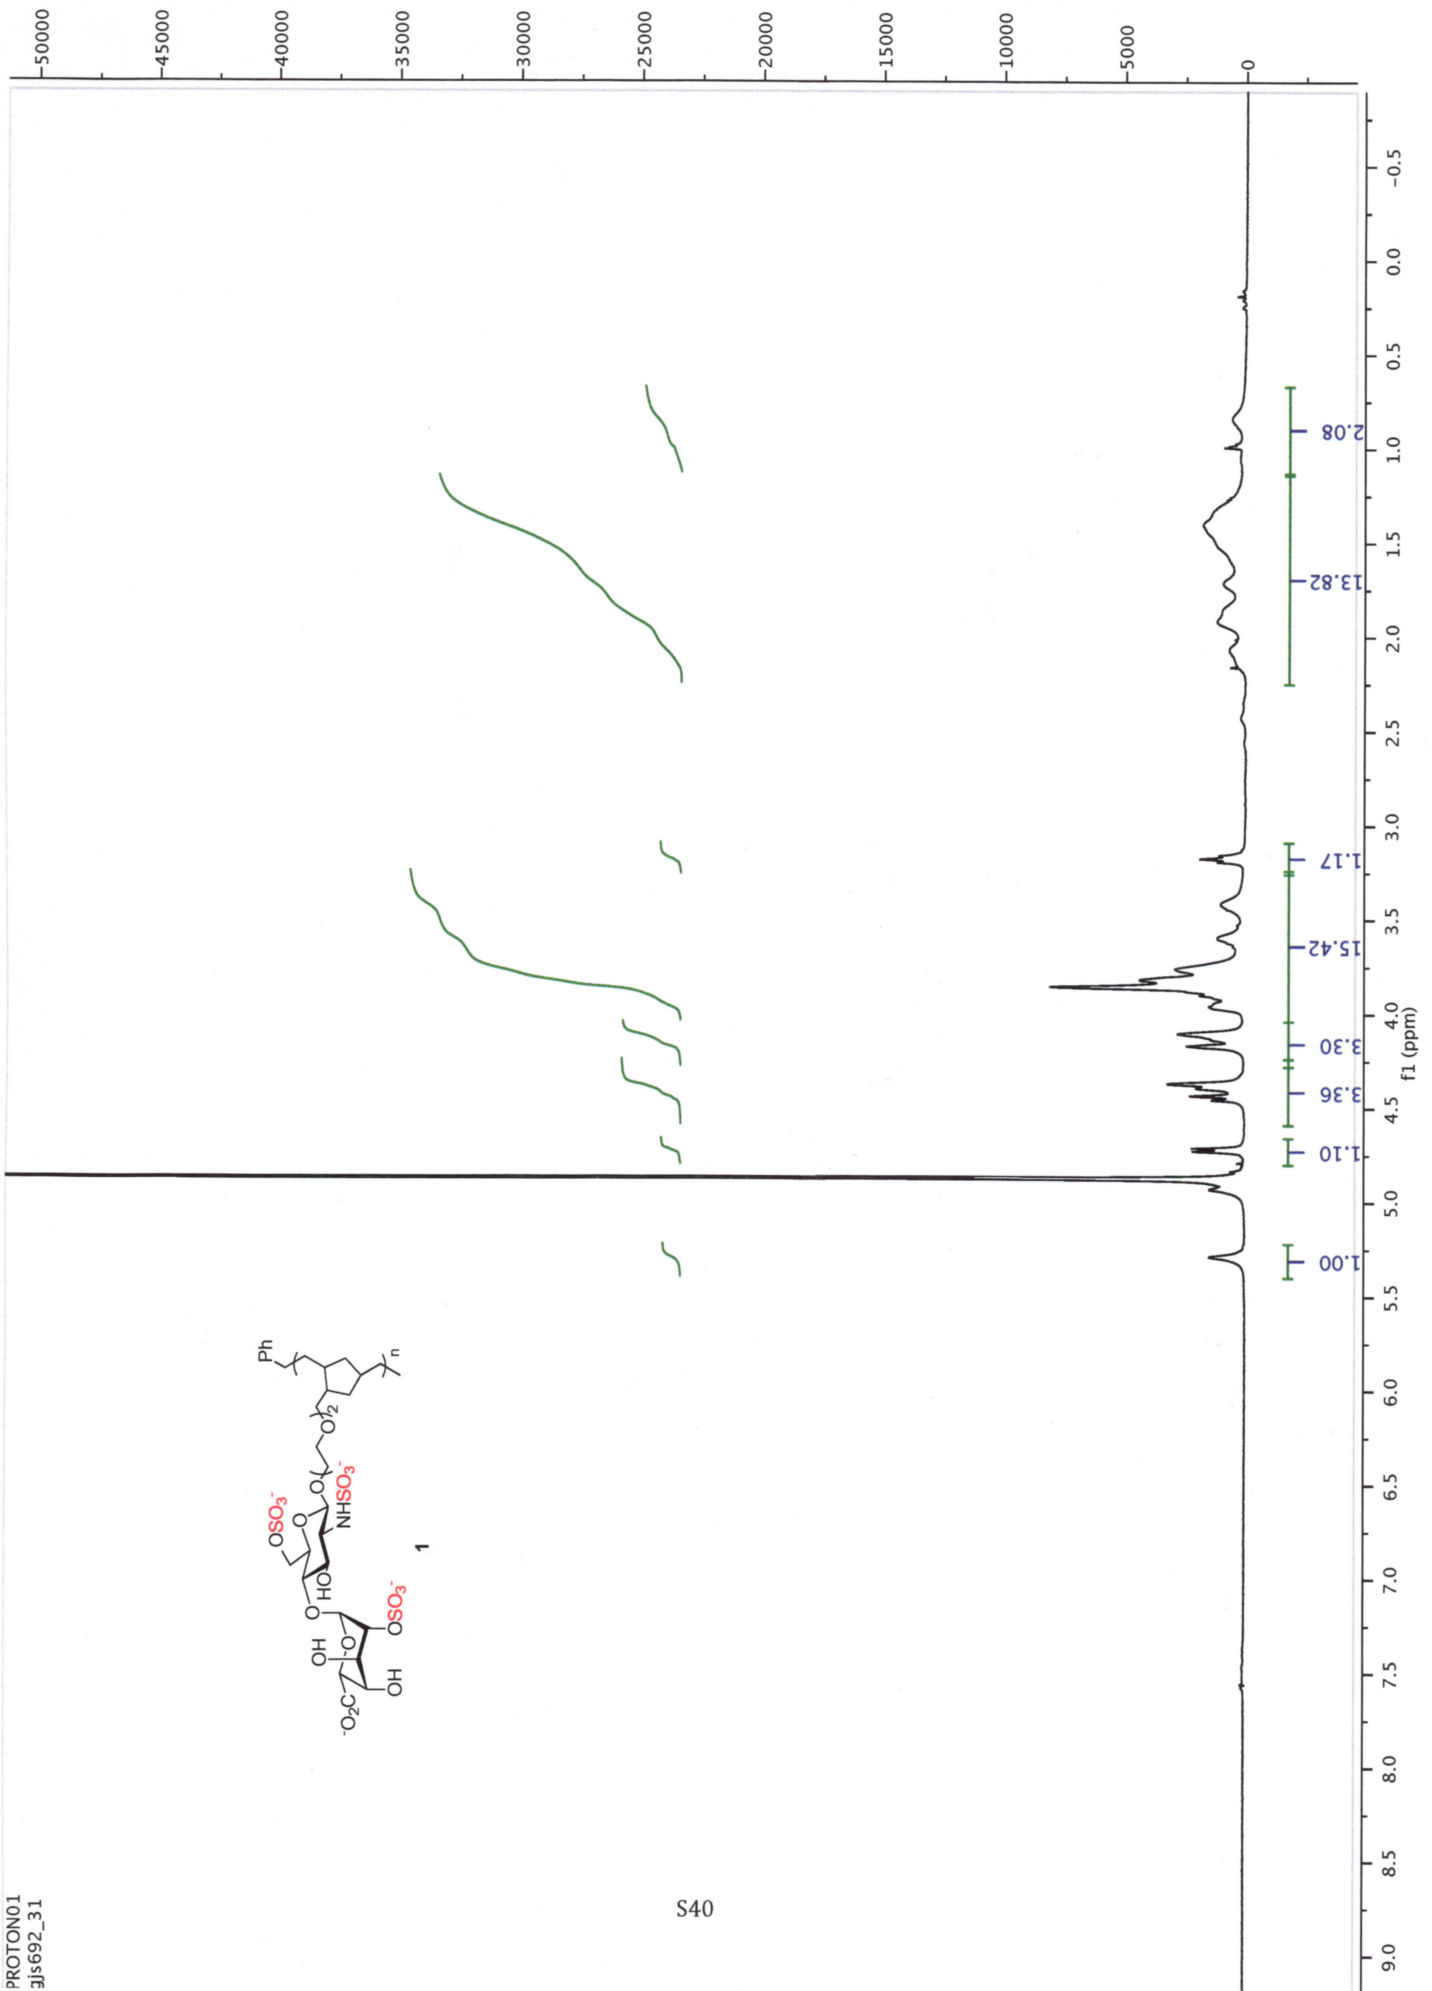

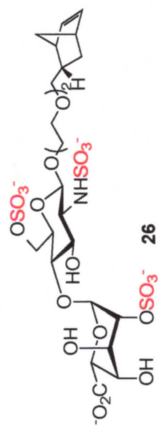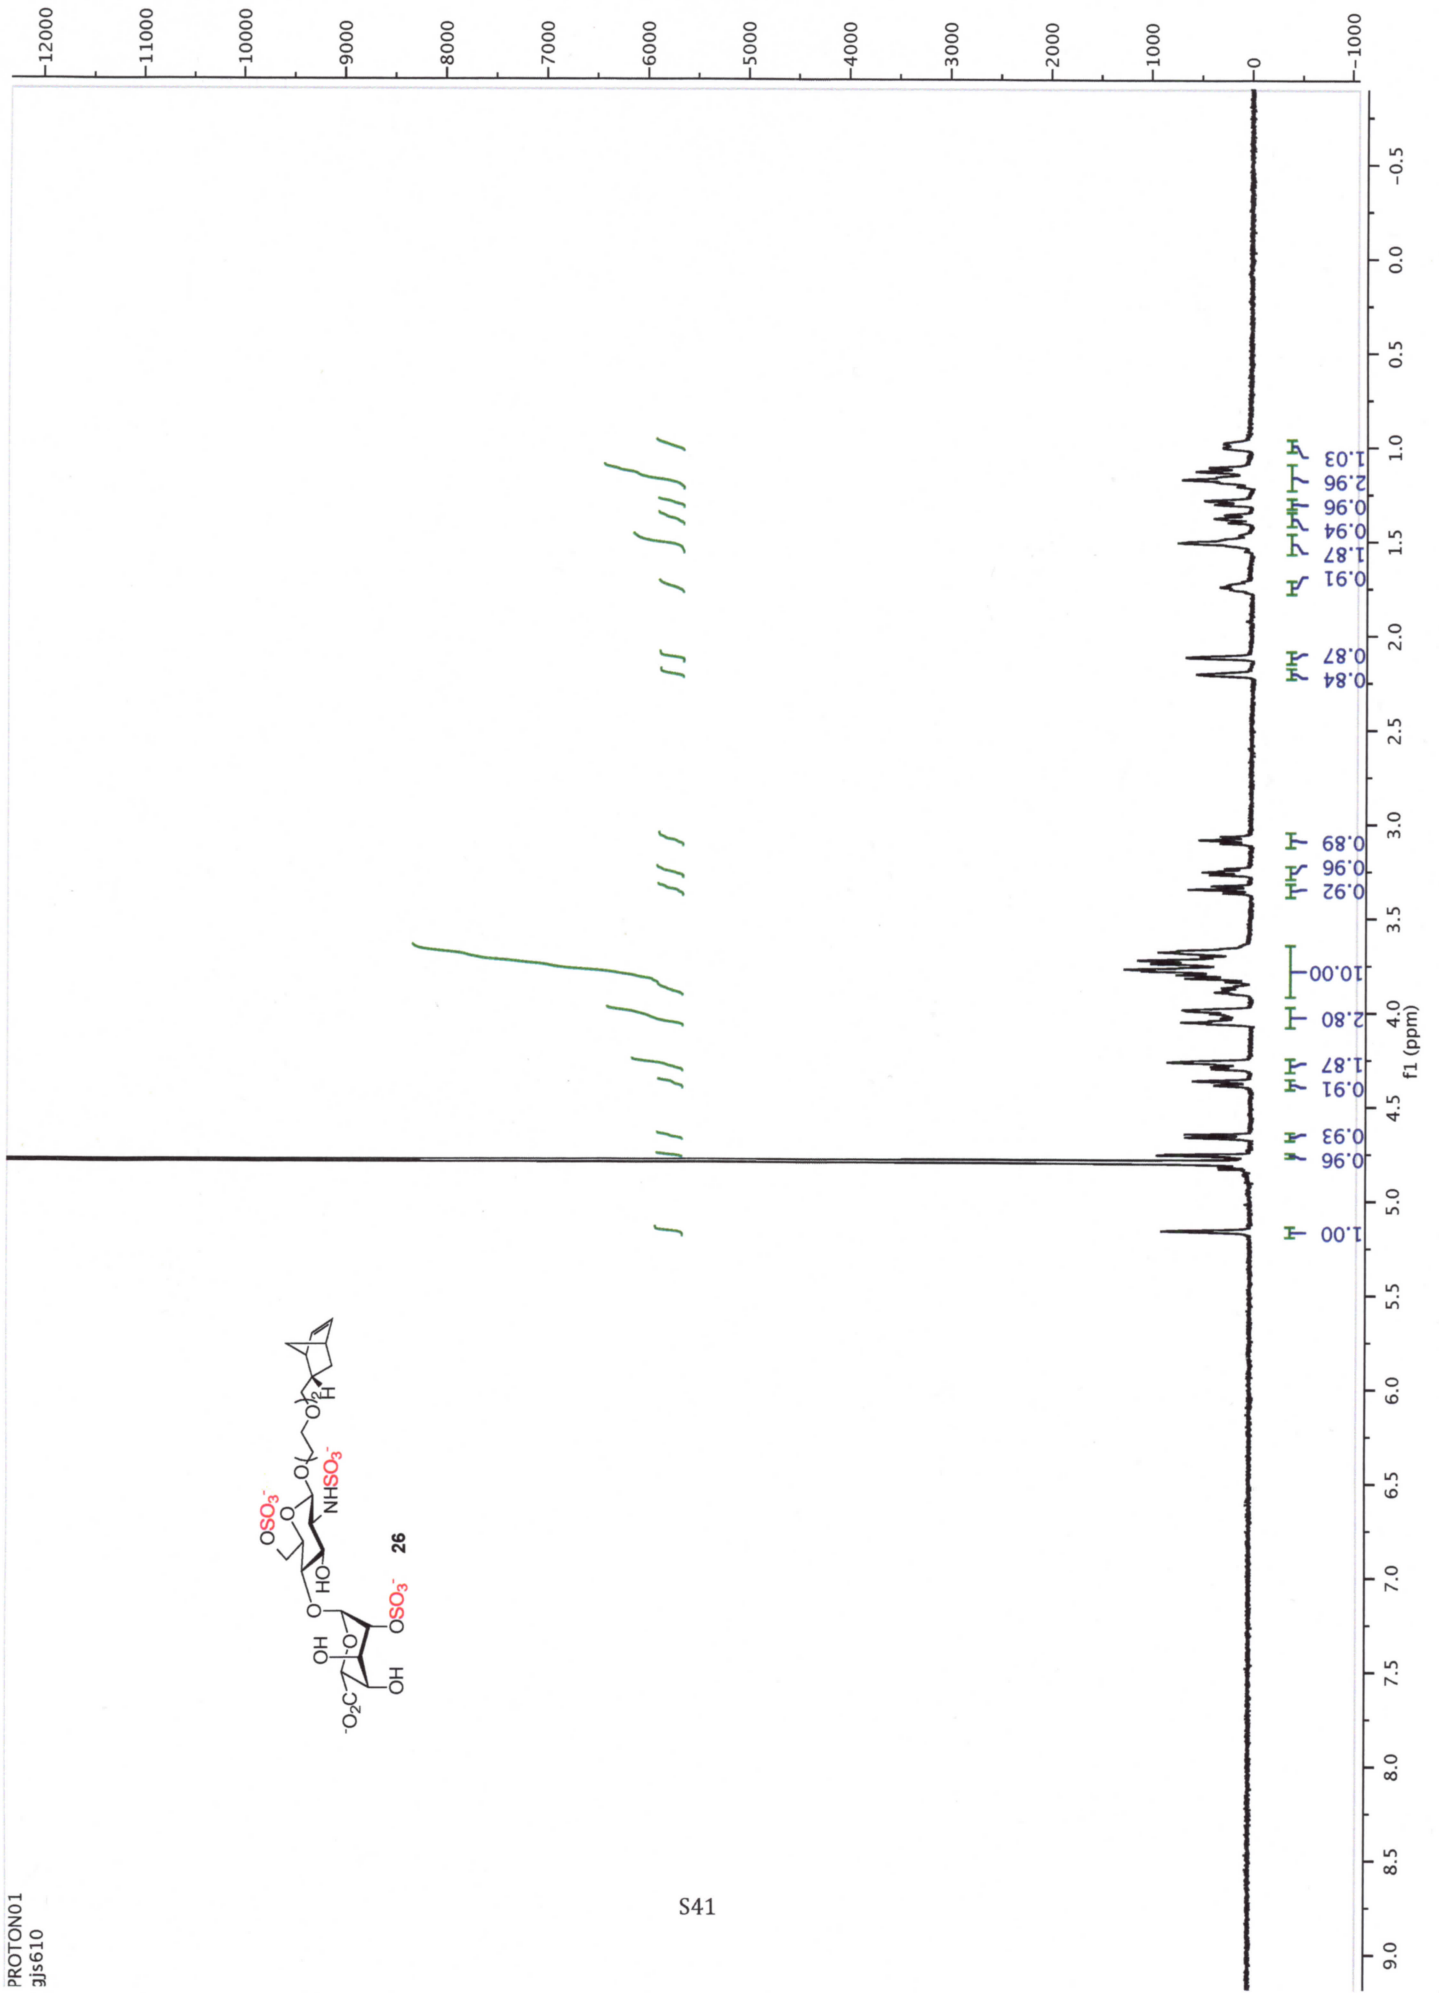



gCOSY01  
gq610\_2

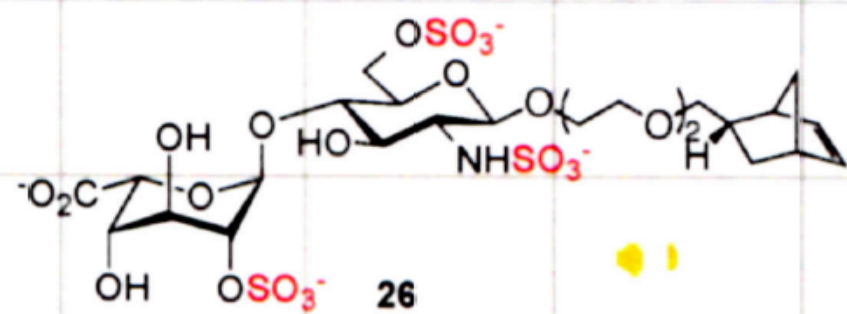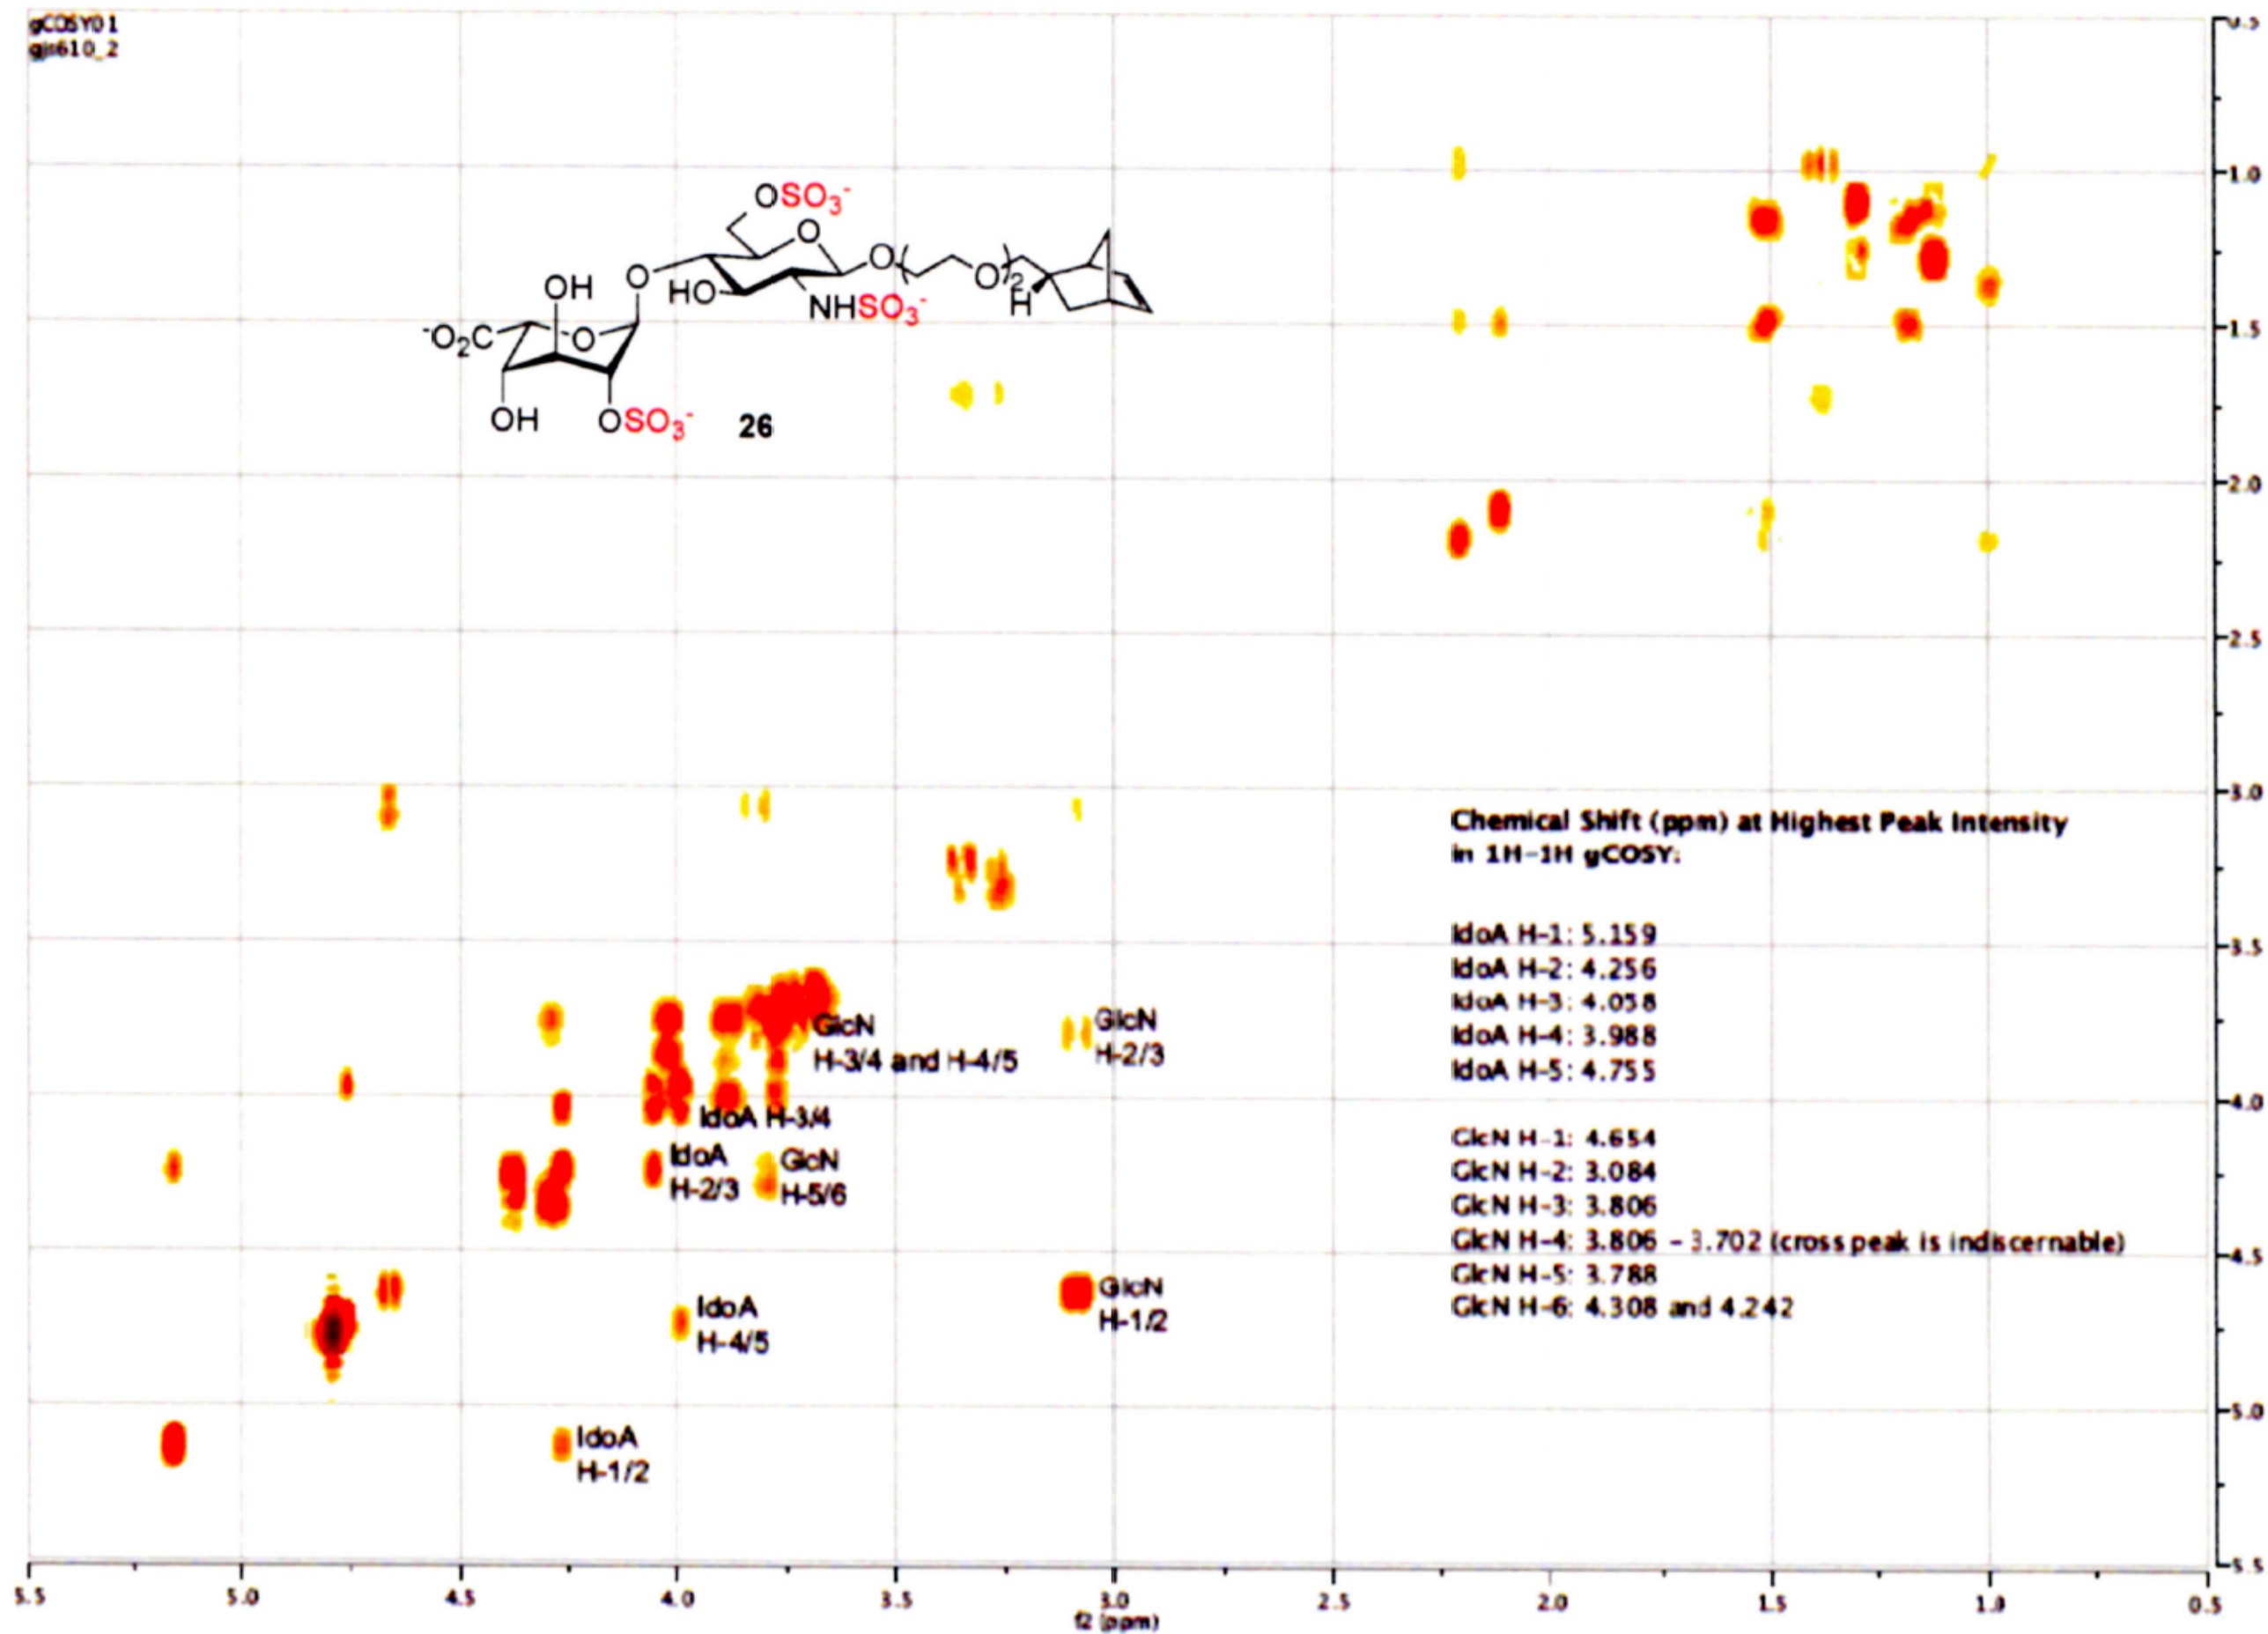

gq162\_sd salt\_gcosy

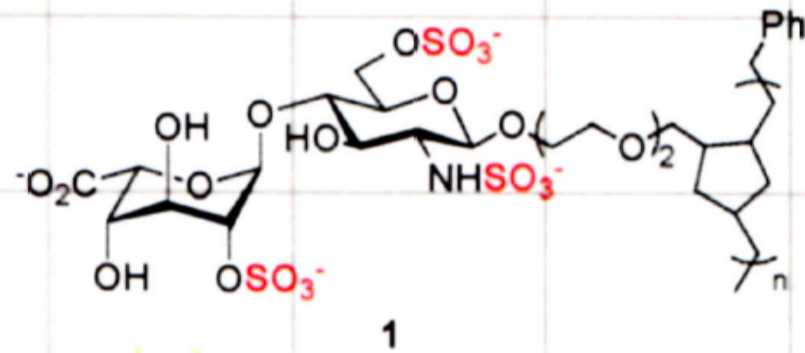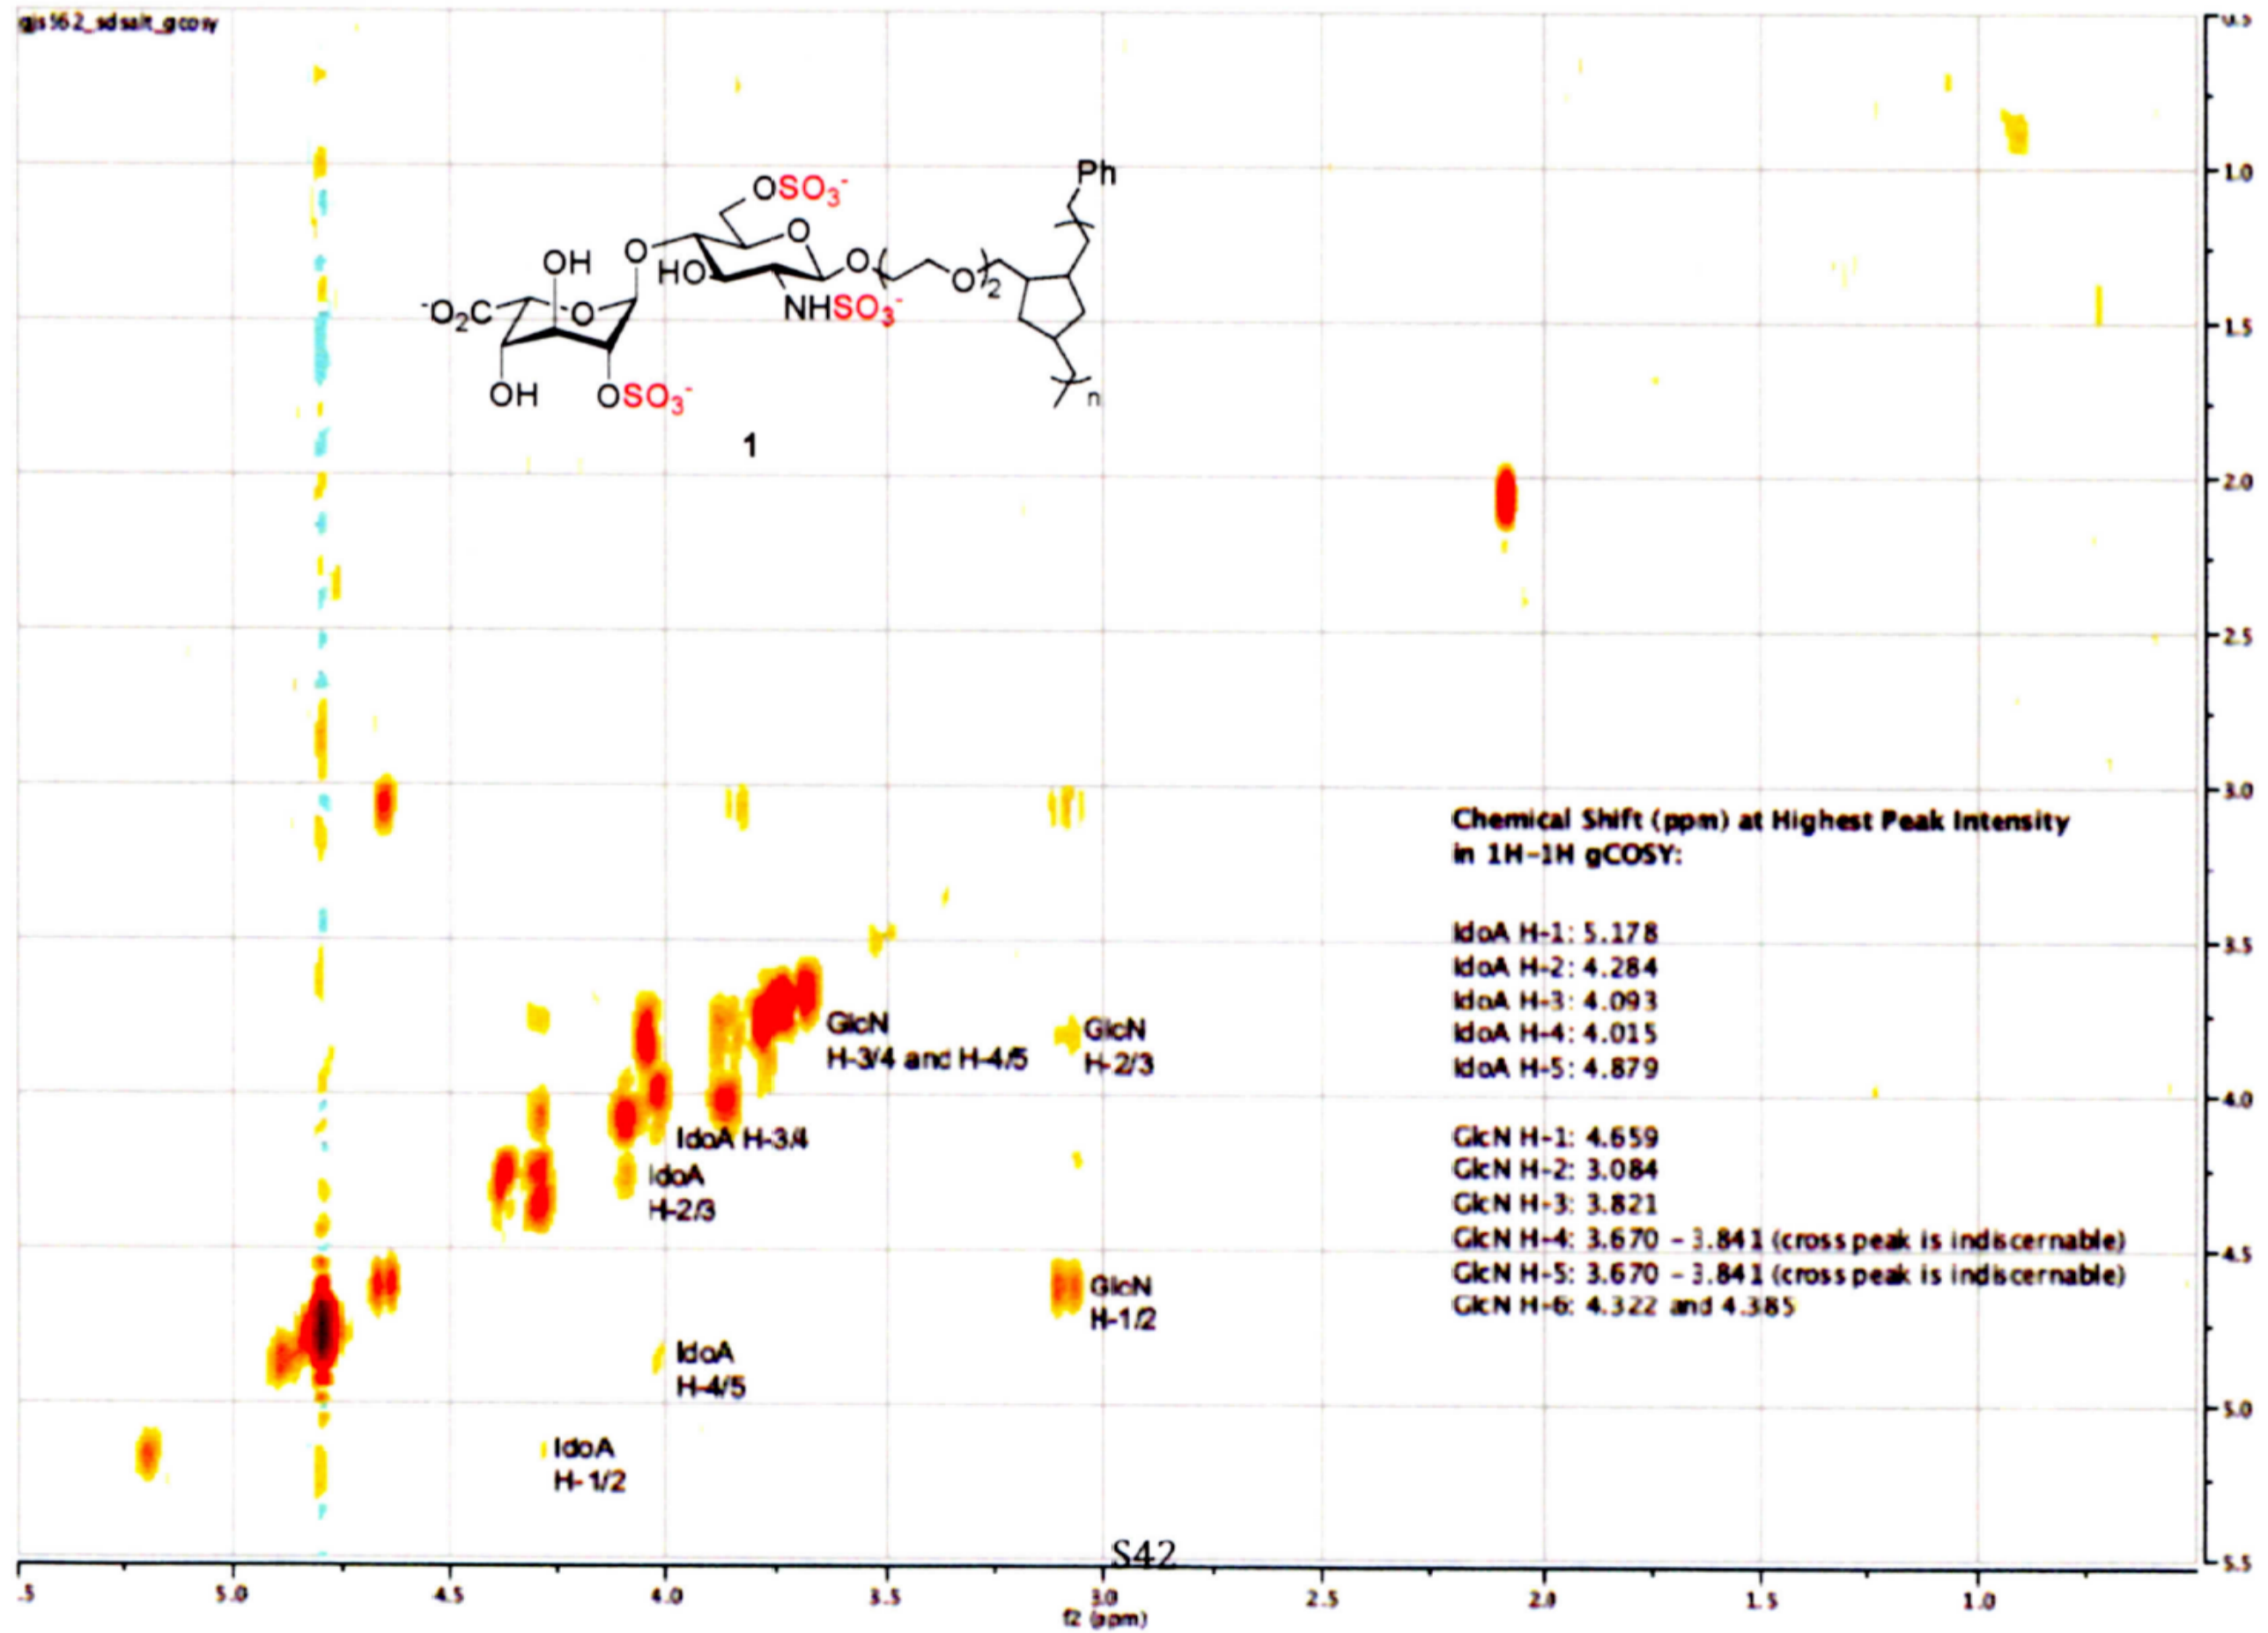

Supplement: ja4027727_si_001.pdf [file ja4027727_si_001.pdf]
